# Supplementary material for: Towards Asymmetrical Methylene Blue Analogues: Synthesis and Reactivity of 3-N′-Arylaminophenothiazines
Source: MDPI journal article supplement (doi:10.3390/molecules27093024), 2022-05-08
Supplement: s1 [file molecules-1716901-supplementary.pdf › molecules-1716901-supplementary.pdf]

Supplementary information

# Towards asymmetrical Methylene Blue analogues: synthesis and reactivity of 3-*N'*-arylaminophenothiazines

Alena Khadieva, Mansur Rayanov, Ksenia Shibaeva, Alexandr Piskunov, Pavel Padnya, Ivan Stoikov

## Content

|                                                                           |    |
|---------------------------------------------------------------------------|----|
| Figure S1. <sup>1</sup> H NMR spectrum of the compound 10.                | 3  |
| Figure S2. <sup>1</sup> H NMR spectrum of the compound 11.                | 3  |
| Figure S3. <sup>1</sup> H NMR spectrum of leuco form of the compound 11.  | 4  |
| Figure S4. <sup>1</sup> H NMR spectrum of the compound 12.                | 4  |
| Figure S5. <sup>1</sup> H NMR spectrum of leuco form of the compound 12.  | 5  |
| Figure S6. <sup>1</sup> H NMR spectrum of the compound 13.                | 5  |
| Figure S7. <sup>1</sup> H NMR spectrum of the compound 14.                | 6  |
| Figure S8. <sup>1</sup> H NMR spectrum of the compound 15.                | 6  |
| Figure S9. <sup>1</sup> H NMR spectrum of the compound 16.                | 7  |
| Figure S10. <sup>1</sup> H NMR spectrum of leuco form of the compound 16. | 7  |
| Figure S11. <sup>1</sup> H NMR spectrum of leuco form of the compound 17. | 8  |
| Figure S12. <sup>1</sup> H NMR spectrum of leuco form of the compound 18. | 8  |
| Figure S13. <sup>1</sup> H NMR spectrum of leuco form of the compound 19. | 9  |
| Figure S14. <sup>1</sup> H NMR spectrum of leuco form of the compound 20. | 9  |
| Figure S15. <sup>1</sup> H NMR spectrum of the compound 21.               | 10 |
| Figure S16. <sup>1</sup> H NMR spectrum of the compound 22.               | 10 |
| Figure S17. <sup>1</sup> H NMR spectrum of the compound 23.               | 11 |
| Figure S18. <sup>1</sup> H NMR spectrum of the compound 24.               | 11 |
| Figure S19. <sup>1</sup> H NMR spectrum of the compound 25.               | 12 |
| Figure S20. <sup>1</sup> H NMR spectrum of leuco form of the compound 25. | 12 |
| Figure S21. <sup>13</sup> C NMR spectrum of the compound 10.              | 13 |
| Figure S22. <sup>13</sup> C NMR spectrum of the compound 11.              | 13 |
| Figure S23. <sup>13</sup> C NMR spectrum of the compound 12.              | 14 |
| Figure S24. <sup>13</sup> C NMR spectrum of the compound 13.              | 14 |
| Figure S25. <sup>13</sup> C NMR spectrum of the compound 14.              | 15 |
| Figure S26. <sup>13</sup> C NMR spectrum of the compound 15.              | 15 |
| Figure S27. <sup>13</sup> C NMR spectrum of the compound 16.              | 16 |
| Figure S28. <sup>13</sup> C NMR spectrum of the compound 17.              | 16 |
| Figure S29. <sup>13</sup> C NMR spectrum of the compound 18.              | 17 |
| Figure S30. <sup>13</sup> C NMR spectrum of the compound 19.              | 17 |
| Figure S31. <sup>13</sup> C NMR spectrum of the compound 20.              | 18 |
| Figure S32. <sup>13</sup> C NMR spectrum of the compound 21.              | 18 |
| Figure S33. <sup>13</sup> C NMR spectrum of the compound 22.              | 19 |
| Figure S34. <sup>13</sup> C NMR spectrum of the compound 23.              | 19 |
| Figure S35. <sup>13</sup> C NMR spectrum of the compound 24.              | 20 |

|                                                                                                                                                                                         |    |
|-----------------------------------------------------------------------------------------------------------------------------------------------------------------------------------------|----|
| Figure S36. $^{13}\text{C}$ NMR spectrum of the compound 25.                                                                                                                            | 20 |
| Figure S37. FT-IR spectrum of the compound 10.                                                                                                                                          | 21 |
| Figure S38. FT-IR spectrum of the compound 11.                                                                                                                                          | 21 |
| Figure S39. FT-IR spectrum of the compound 12.                                                                                                                                          | 22 |
| Figure S40. FT-IR spectrum of the compound 13.                                                                                                                                          | 22 |
| Figure S41. FT-IR spectrum of the compound 14.                                                                                                                                          | 23 |
| Figure S42. FT-IR spectrum of the compound 15.                                                                                                                                          | 23 |
| Figure S43. FT-IR spectrum of the compound 16.                                                                                                                                          | 24 |
| Figure S44. FT-IR spectrum of the compound 17.                                                                                                                                          | 24 |
| Figure S45. FT-IR spectrum of the compound 18.                                                                                                                                          | 25 |
| Figure S46. FT-IR spectrum of the compound 19.                                                                                                                                          | 25 |
| Figure S47. FT-IR spectrum of the compound 20.                                                                                                                                          | 26 |
| Figure S48. FT-IR spectrum of the compound 21.                                                                                                                                          | 26 |
| Figure S49. FT-IR spectrum of the compound 22.                                                                                                                                          | 27 |
| Figure S50. FT-IR spectrum of the compound 23.                                                                                                                                          | 27 |
| Figure S51. FT-IR spectrum of the compound 24.                                                                                                                                          | 28 |
| Figure S52. FT-IR spectrum of the compound 25.                                                                                                                                          | 28 |
| Figure S53. HRMS spectrum of the compound 10.                                                                                                                                           | 29 |
| Figure S54. HRMS spectrum of the compound 11.                                                                                                                                           | 29 |
| Figure S55. HRMS spectrum of the compound 12.                                                                                                                                           | 30 |
| Figure S56. HRMS spectrum of the compound 13.                                                                                                                                           | 30 |
| Figure S57. HRMS spectrum of the compound 14.                                                                                                                                           | 31 |
| Figure S58. HRMS spectrum of the compound 15.                                                                                                                                           | 31 |
| Figure S59. HRMS spectrum of the compound 16.                                                                                                                                           | 32 |
| Figure S60. HRMS spectrum of the compound 17.                                                                                                                                           | 32 |
| Figure S61. HRMS spectrum of the compound 18.                                                                                                                                           | 33 |
| Figure S62. HRMS spectrum of the compound 19.                                                                                                                                           | 33 |
| Figure S63. HRMS spectrum of the compound 20.                                                                                                                                           | 34 |
| Figure S64. HRMS spectrum of the compound 21.                                                                                                                                           | 34 |
| Figure S65. HRMS spectrum of the compound 22.                                                                                                                                           | 35 |
| Figure S66. HRMS spectrum of the compound 23.                                                                                                                                           | 35 |
| Figure S67. HRMS spectrum of the compound 24.                                                                                                                                           | 36 |
| Figure S68. HRMS spectrum of the compound 25.                                                                                                                                           | 36 |
| Figure S69. UV-Vis spectra of the compounds <b>10</b> , <b>11</b> , <b>12</b> , <b>16</b> , <b>22</b> , and <b>23</b> (THF, $1 \times 10^{-5}$ M).                                      | 36 |
| Figure S70. Calculated (TD-DFT M06-HF/6-311++G(d,p)/IEFPCM) UV-Vis absorption spectra of the compounds <b>10</b> , <b>11</b> , <b>12</b> , <b>16</b> , <b>22</b> , and <b>23</b> in THF | 36 |
| Table S1. Absolute energies, minimum frequencies and calculated atomic coordinates for cations 1, 10-16 (DFT B3LYP/6-311++G(d,p)).                                                      | 38 |

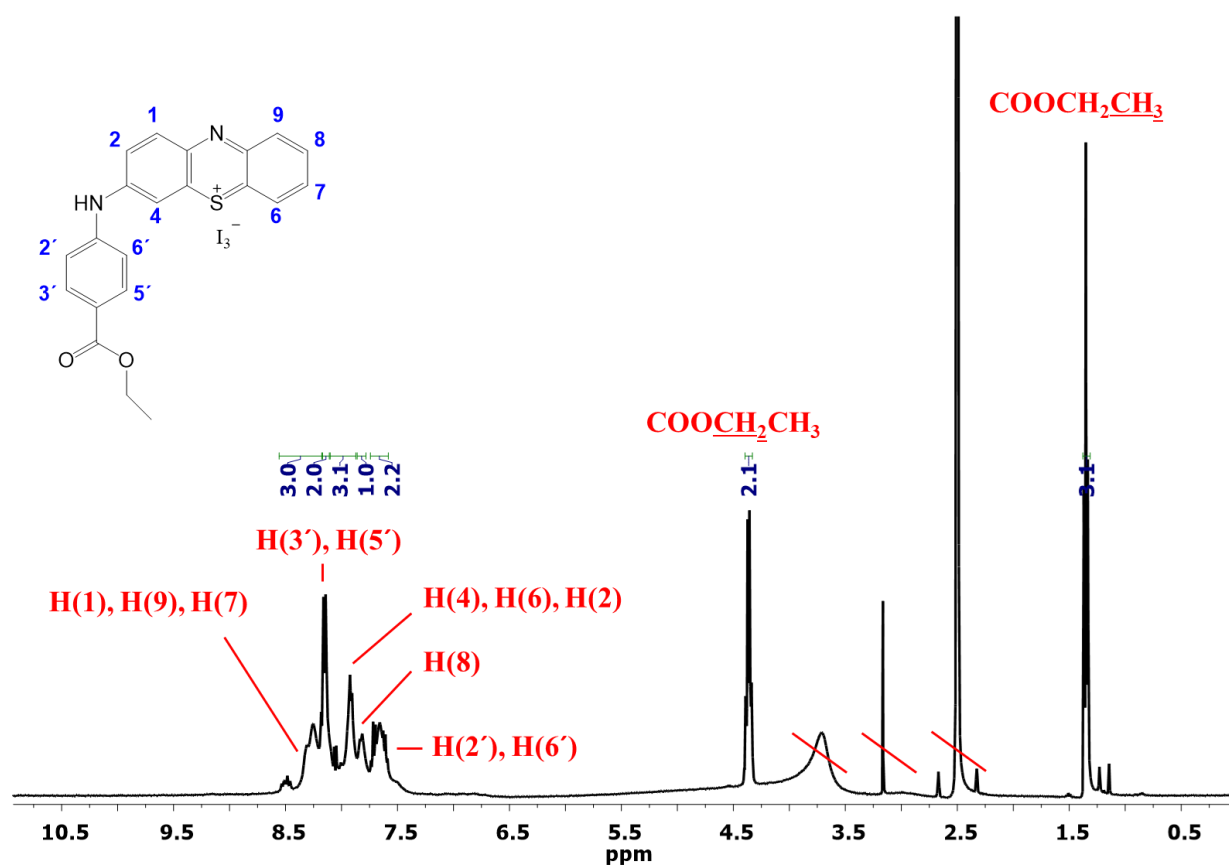

Figure S1.  $^1\text{H}$  NMR spectrum of the compound **10**,  $\text{DMSO}-d_6$ , 300 K, 400 MHz.

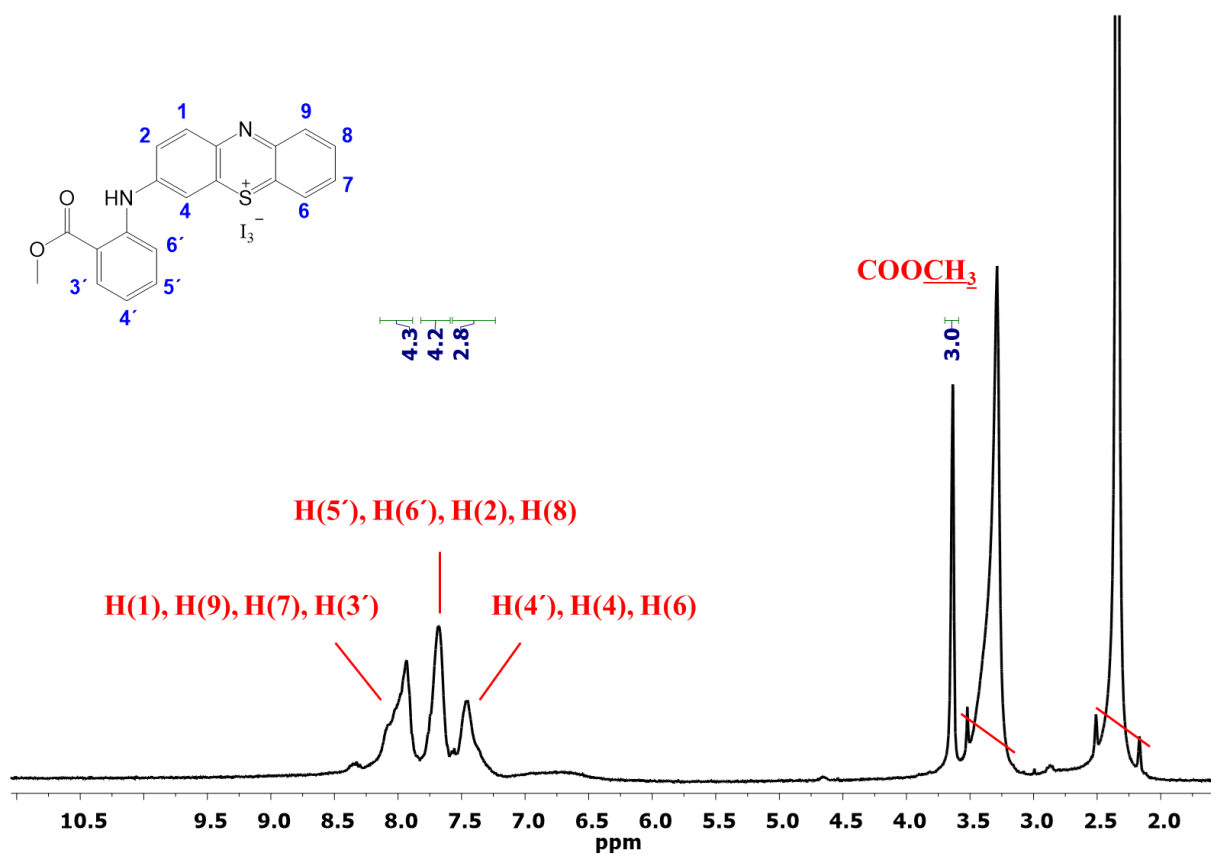

Figure S2.  $^1\text{H}$  NMR spectrum of the compound **11**,  $\text{DMSO}-d_6$ , 300 K, 400 MHz.

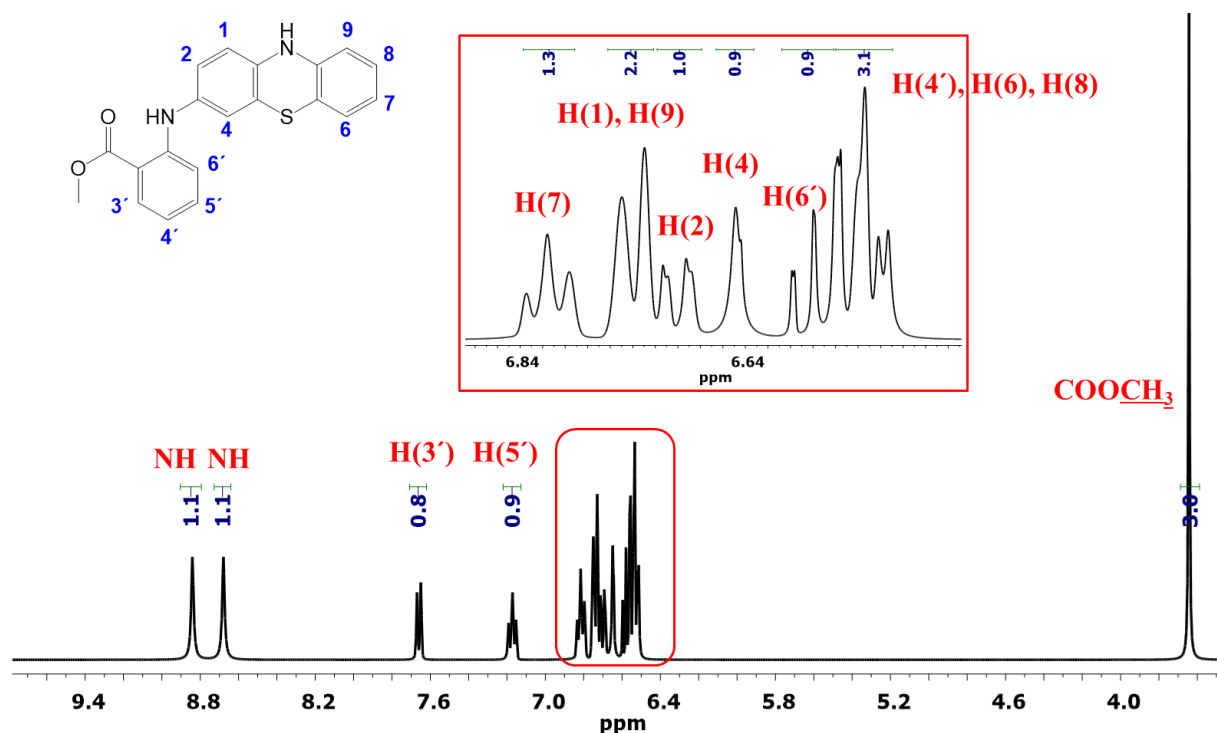

Figure S3.  $^1\text{H}$  NMR spectrum of leuco form of the compound 11, DMSO- $d_6$  + 2 %  $\text{N}_2\text{H}_4\cdot\text{H}_2\text{O}$ , 300 K, 400 MHz.

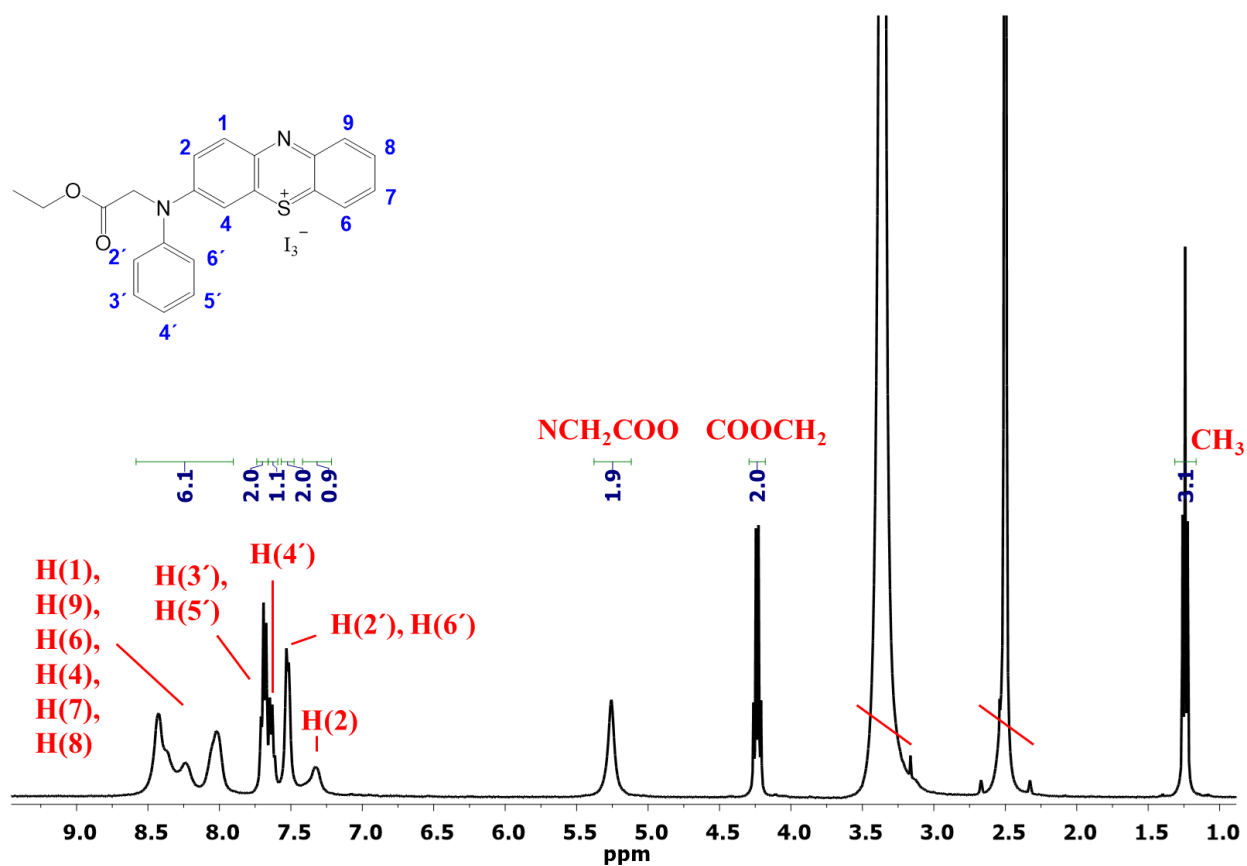

Figure S4.  $^1\text{H}$  NMR spectrum of the compound 12, DMSO- $d_6$ , 300 K, 400 MHz.

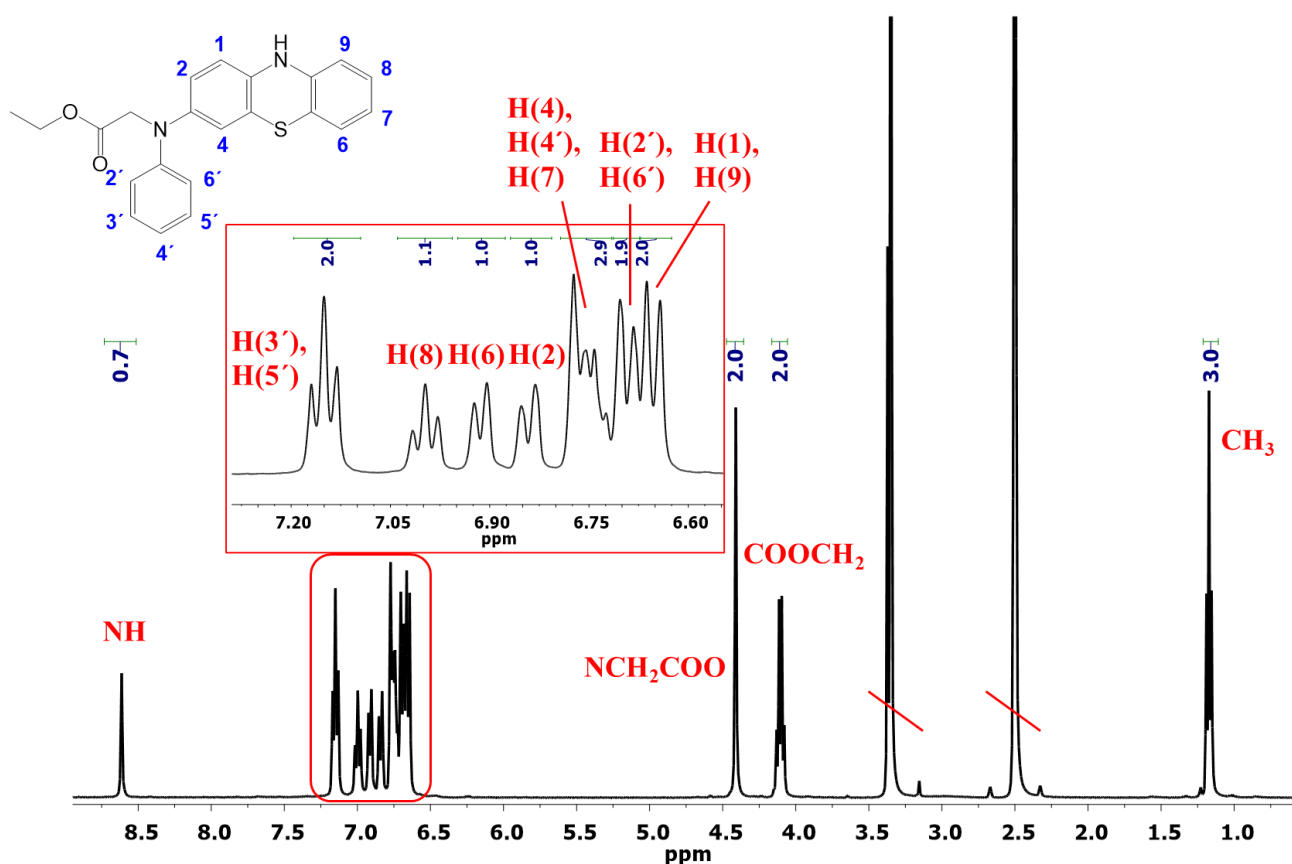

Figure S5. <sup>1</sup>H NMR spectrum of leuco form of the compound 12, DMSO-*d*<sub>6</sub> + 2 % N<sub>2</sub>H<sub>4</sub>·H<sub>2</sub>O, 300 K, 400 MHz.

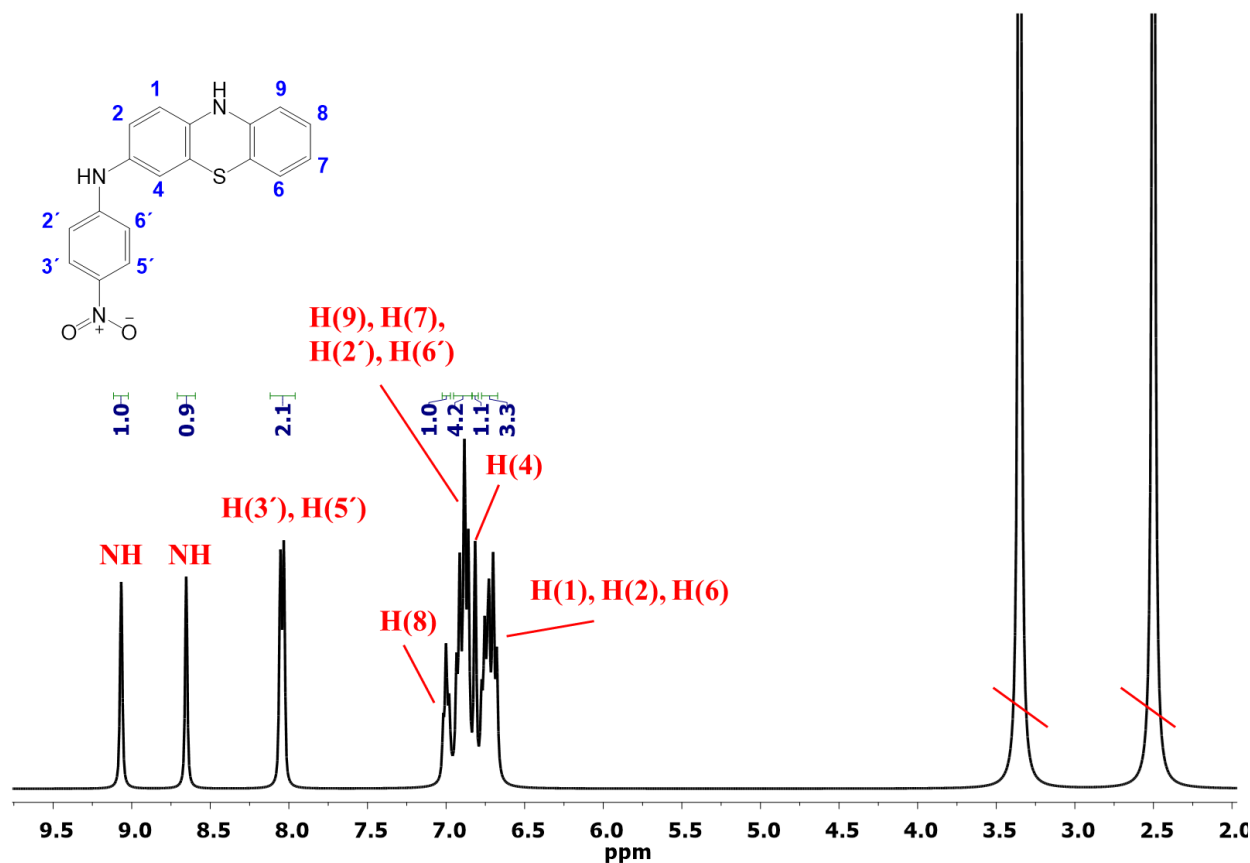

Figure S6. <sup>1</sup>H NMR spectrum of the compound 13, DMSO-*d*<sub>6</sub>, 300 K, 400 MHz.

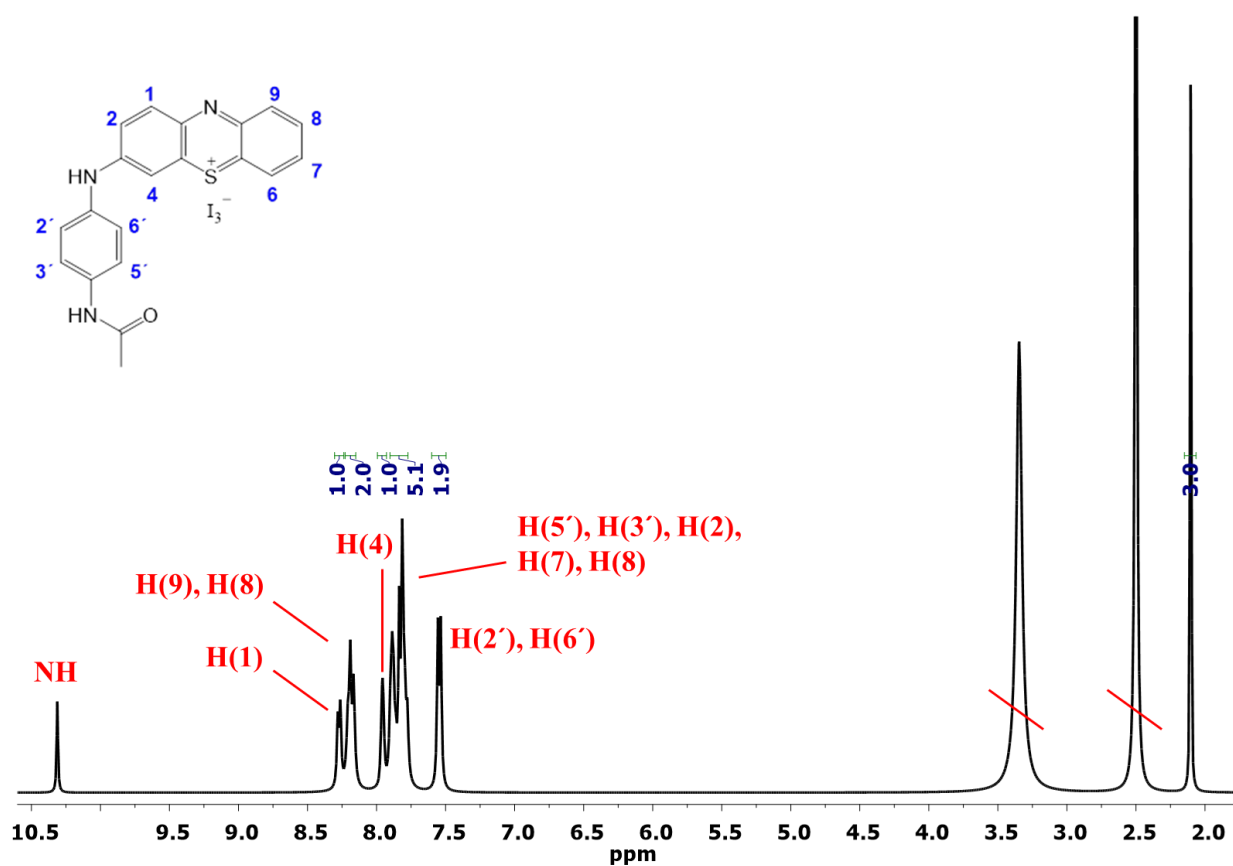

Figure S7.  $^1\text{H}$  NMR spectrum of the compound **14**, DMSO- $d_6$ , 300 K, 400 MHz.

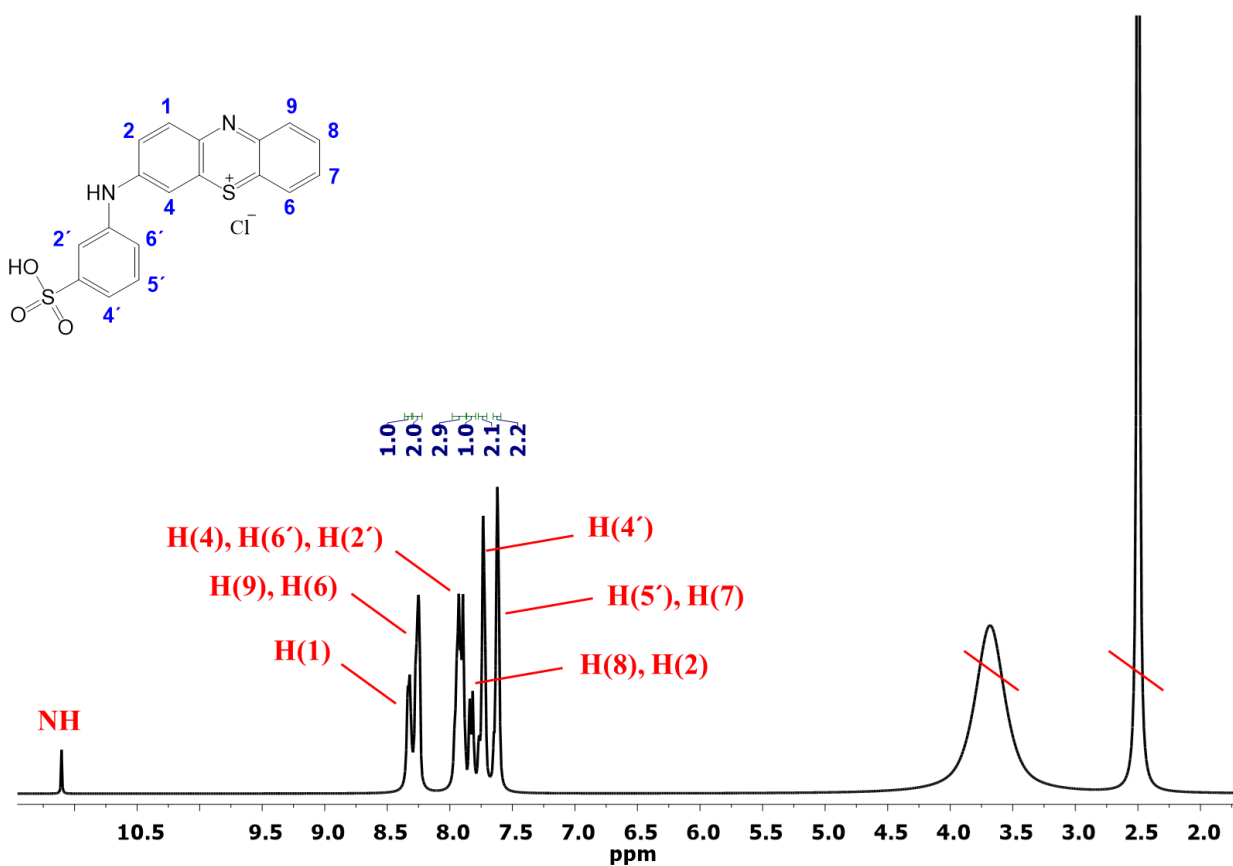

Figure S8.  $^1\text{H}$  NMR spectrum of the compound **15**, DMSO- $d_6$ , 300 K, 400 MHz.

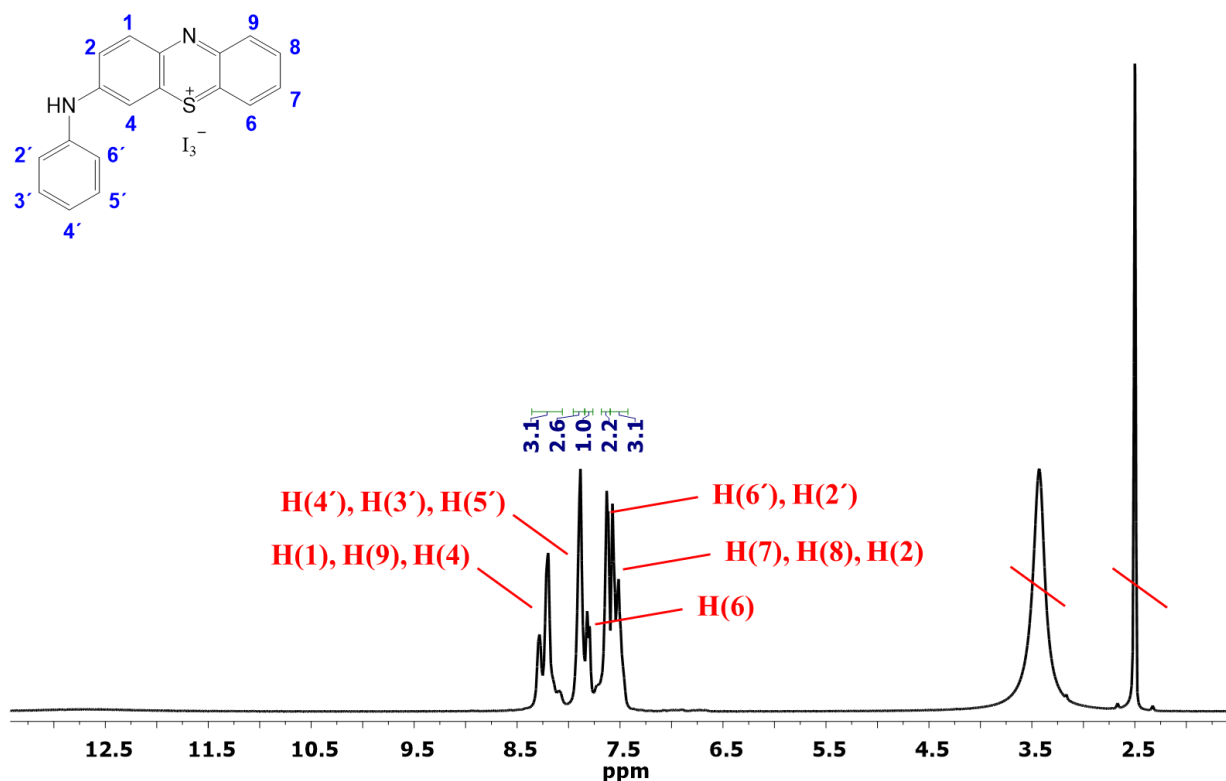

Figure S9.  $^1\text{H}$  NMR spectrum of the compound **16**,  $\text{DMSO-}d_6$ , 300 K, 400 MHz.

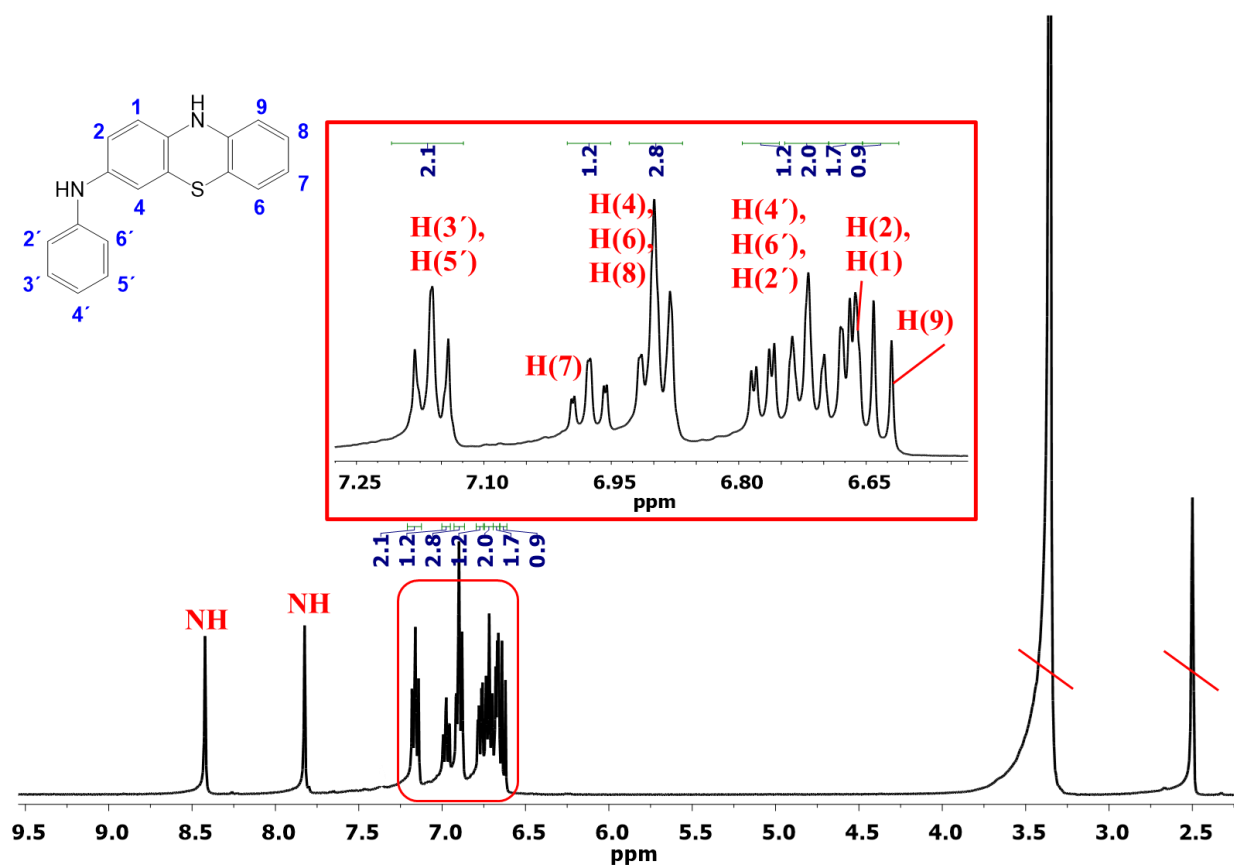

Figure S10.  $^1\text{H}$  NMR spectrum of leuco form of the compound **16**,  $\text{DMSO-}d_6 + 2\% \text{N}_2\text{H}_4 \cdot \text{H}_2\text{O}$ , 300 K, 400 MHz.

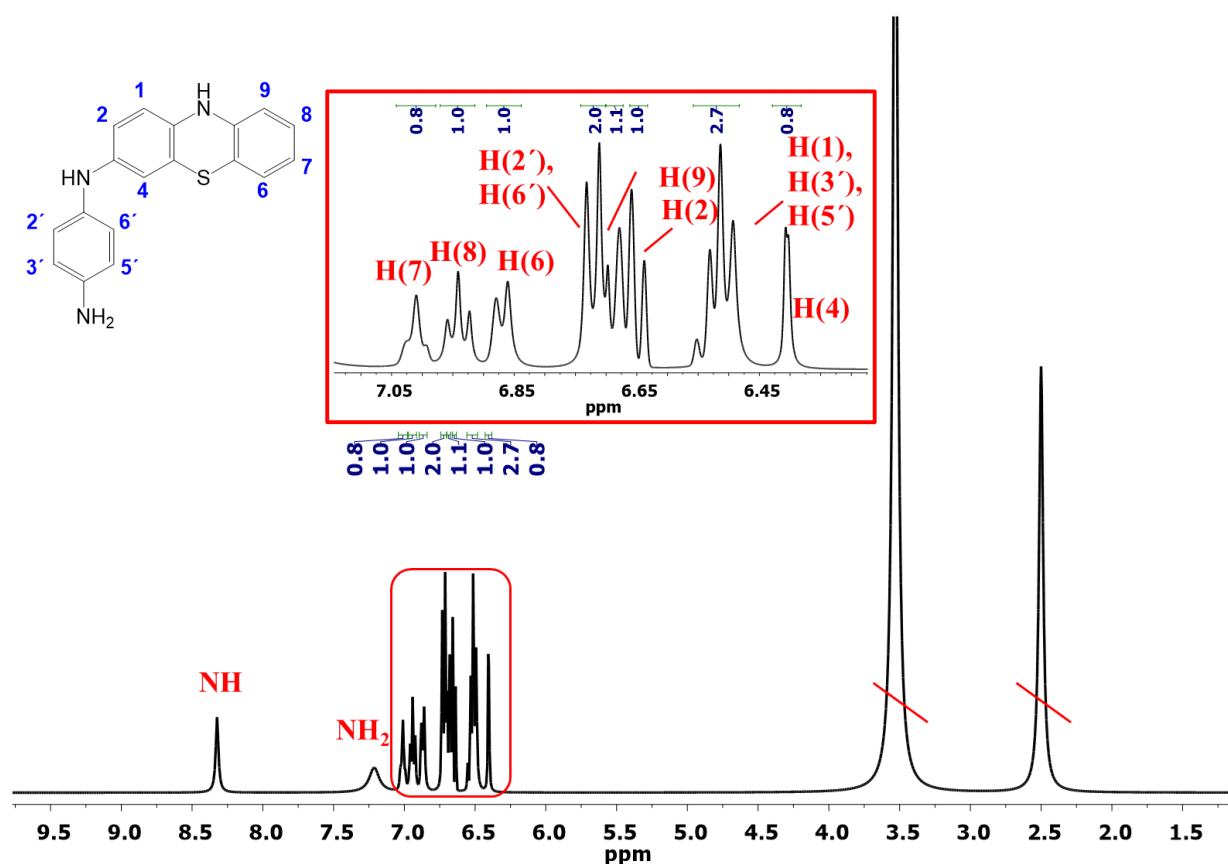

Figure S11.  $^1\text{H}$  NMR spectrum of leuco form of the compound 17, DMSO- $d_6$  + 2 %  $\text{N}_2\text{H}_4\cdot\text{H}_2\text{O}$ , 300 K, 400 MHz.

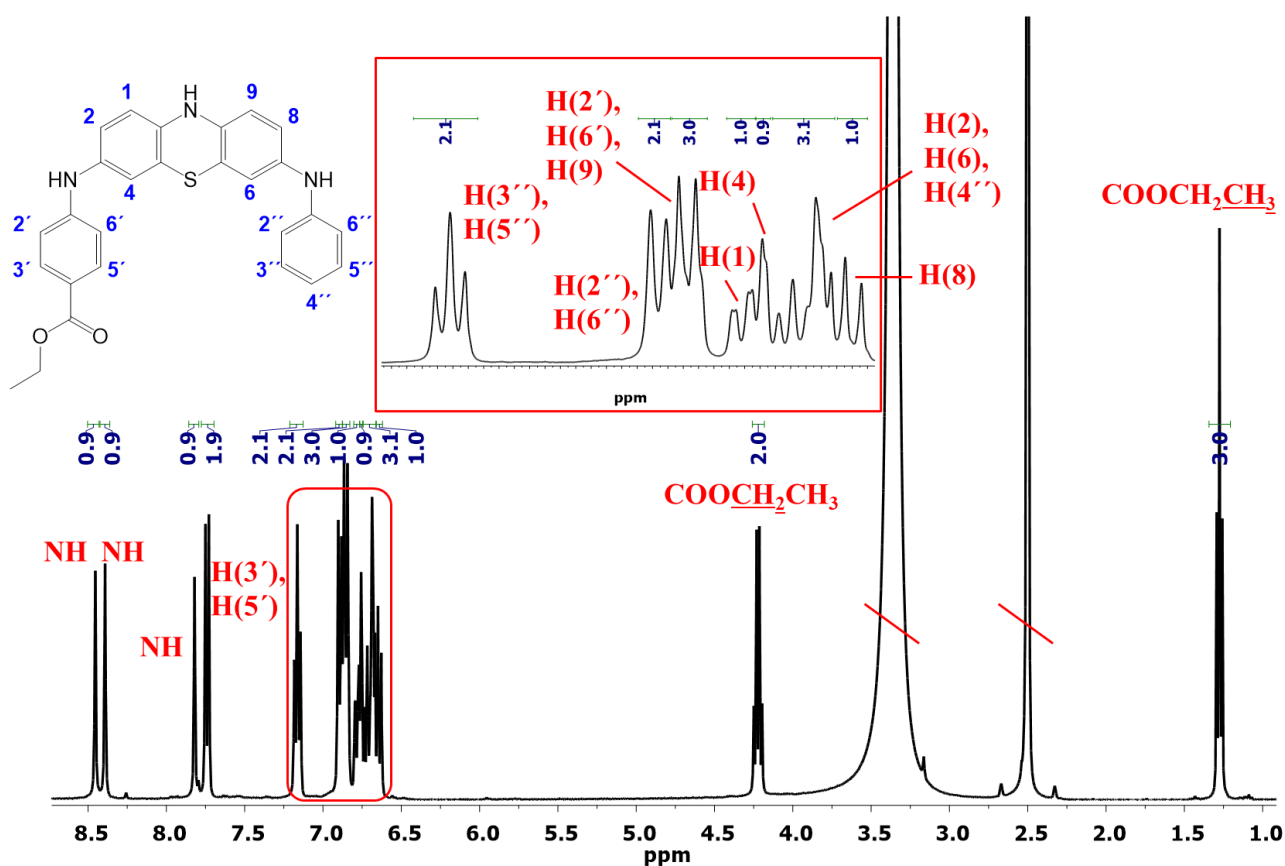

Figure S12.  $^1\text{H}$  NMR spectrum of leuco form of the compound 18, DMSO- $d_6$  + 2 %  $\text{N}_2\text{H}_4\cdot\text{H}_2\text{O}$ , 300 K, 400 MHz.



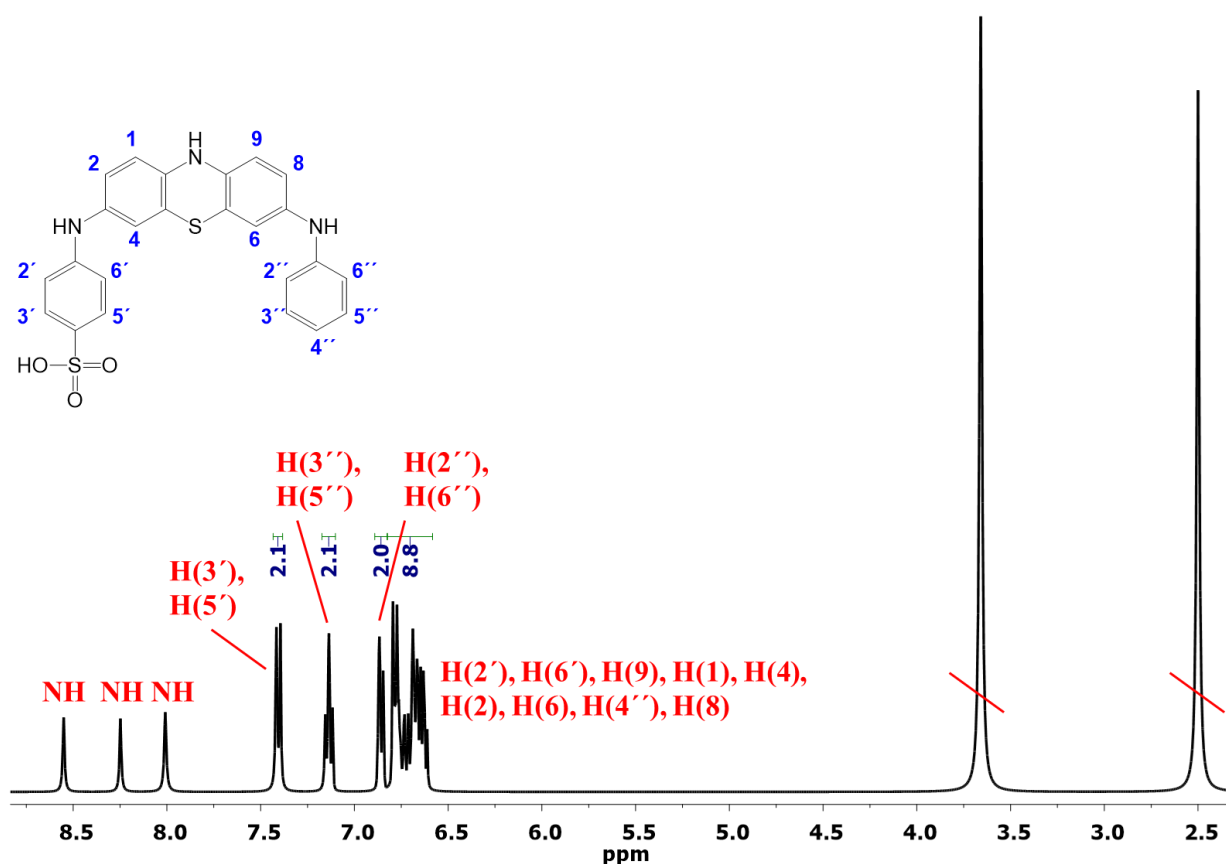

Figure S13.  $^1\text{H}$  NMR spectrum of leuco form of the compound **19**, DMSO- $d_6$  + 2 %  $\text{N}_2\text{H}_4\cdot\text{H}_2\text{O}$ , 300 K, 400 MHz.

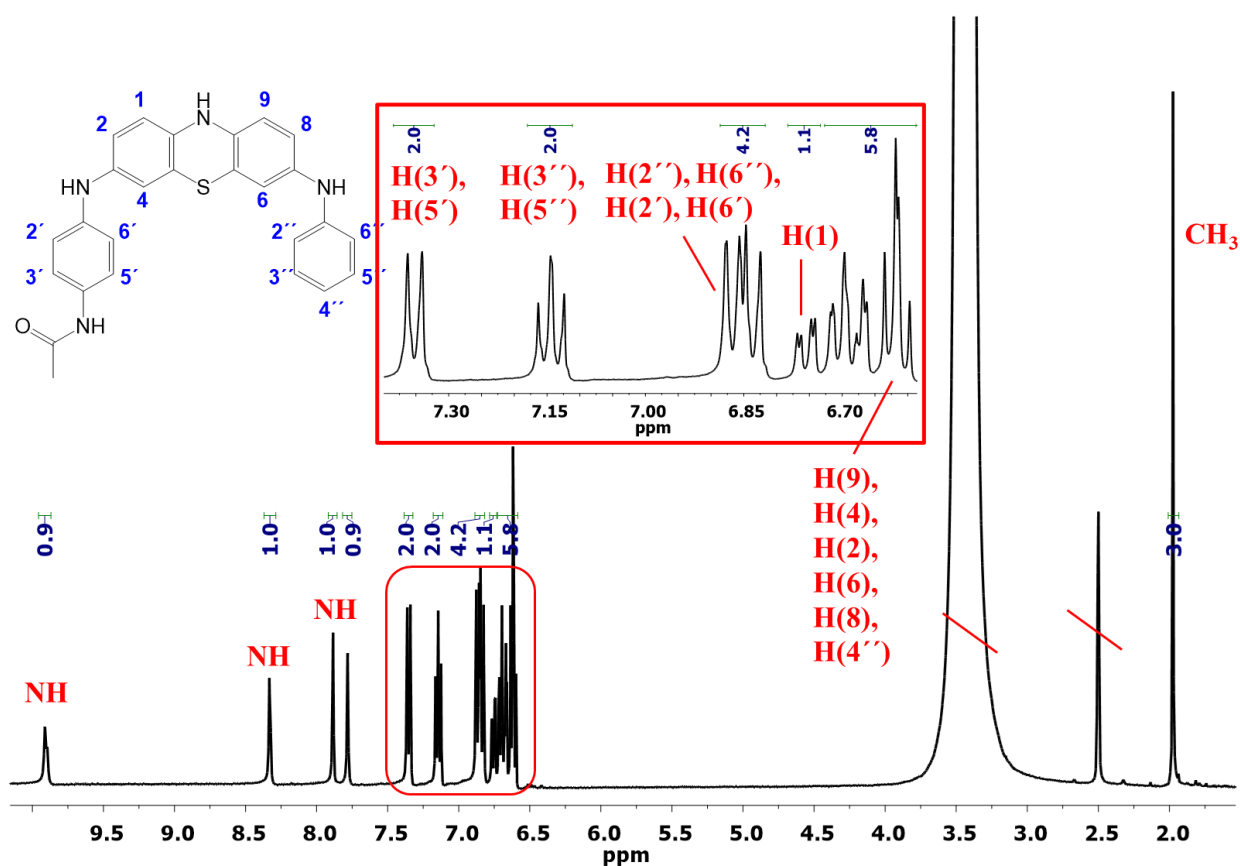

Figure S14.  $^1\text{H}$  NMR spectrum of leuco form of the compound **20**, DMSO- $d_6$  + 2 %  $\text{N}_2\text{H}_4\cdot\text{H}_2\text{O}$ , 300 K, 400 MHz.

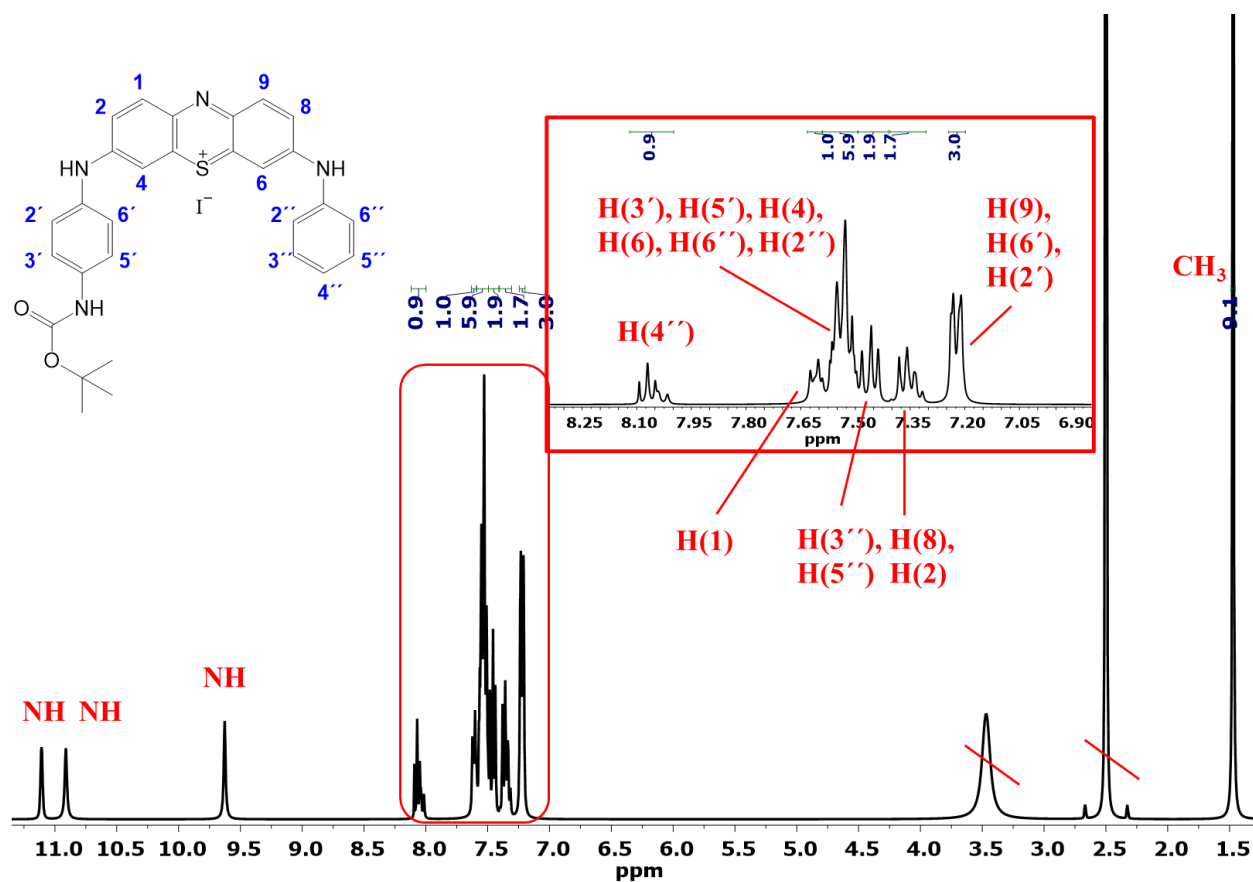

Figure S15. <sup>1</sup>H NMR spectrum of the compound **21**, DMSO-*d*<sub>6</sub>, 300 K, 400 MHz.

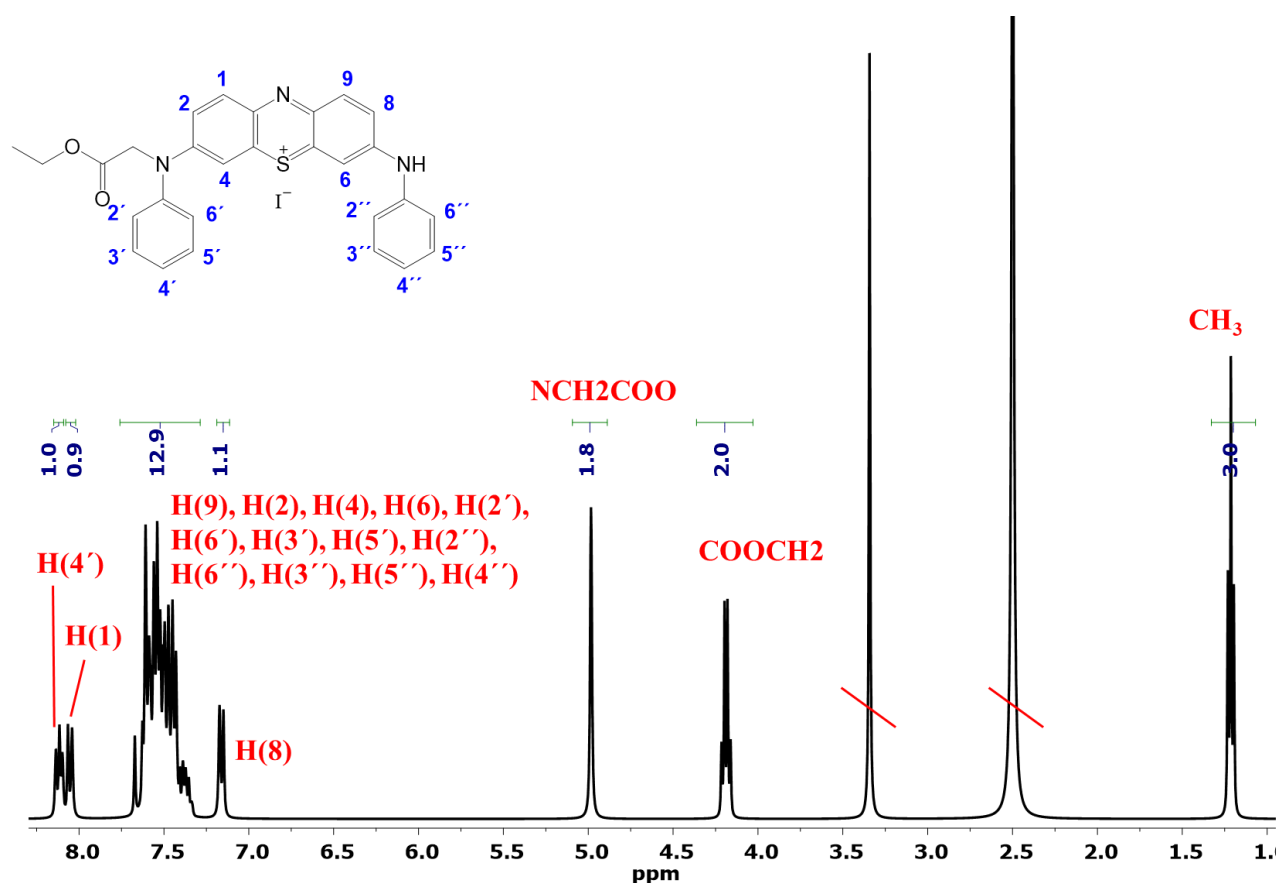

Figure S16. <sup>1</sup>H NMR spectrum of the compound **22**, DMSO-*d*<sub>6</sub>, 300 K, 400 MHz.

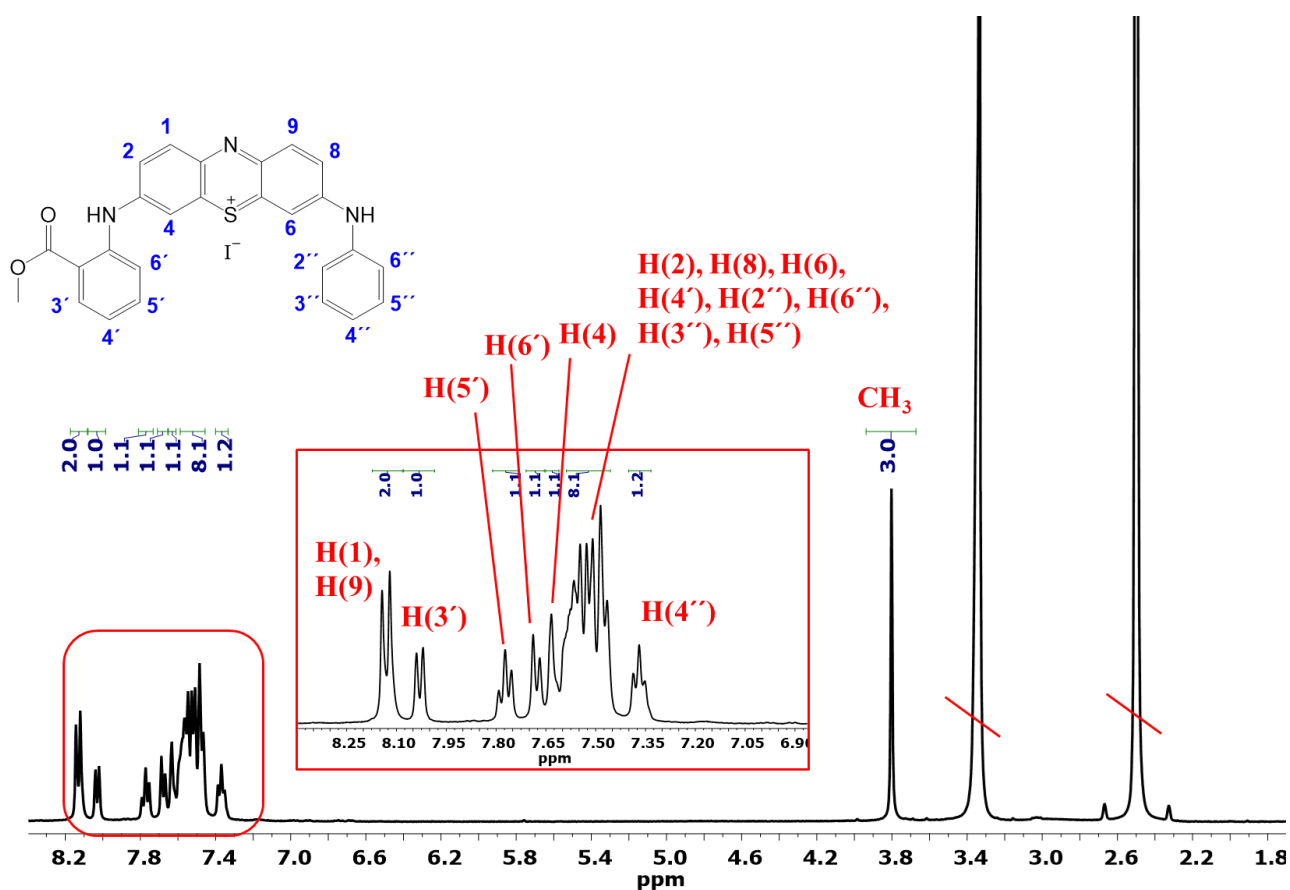

Figure S17. <sup>1</sup>H NMR spectrum of the compound 23, DMSO-*d*<sub>6</sub>, 300 K, 400 MHz.

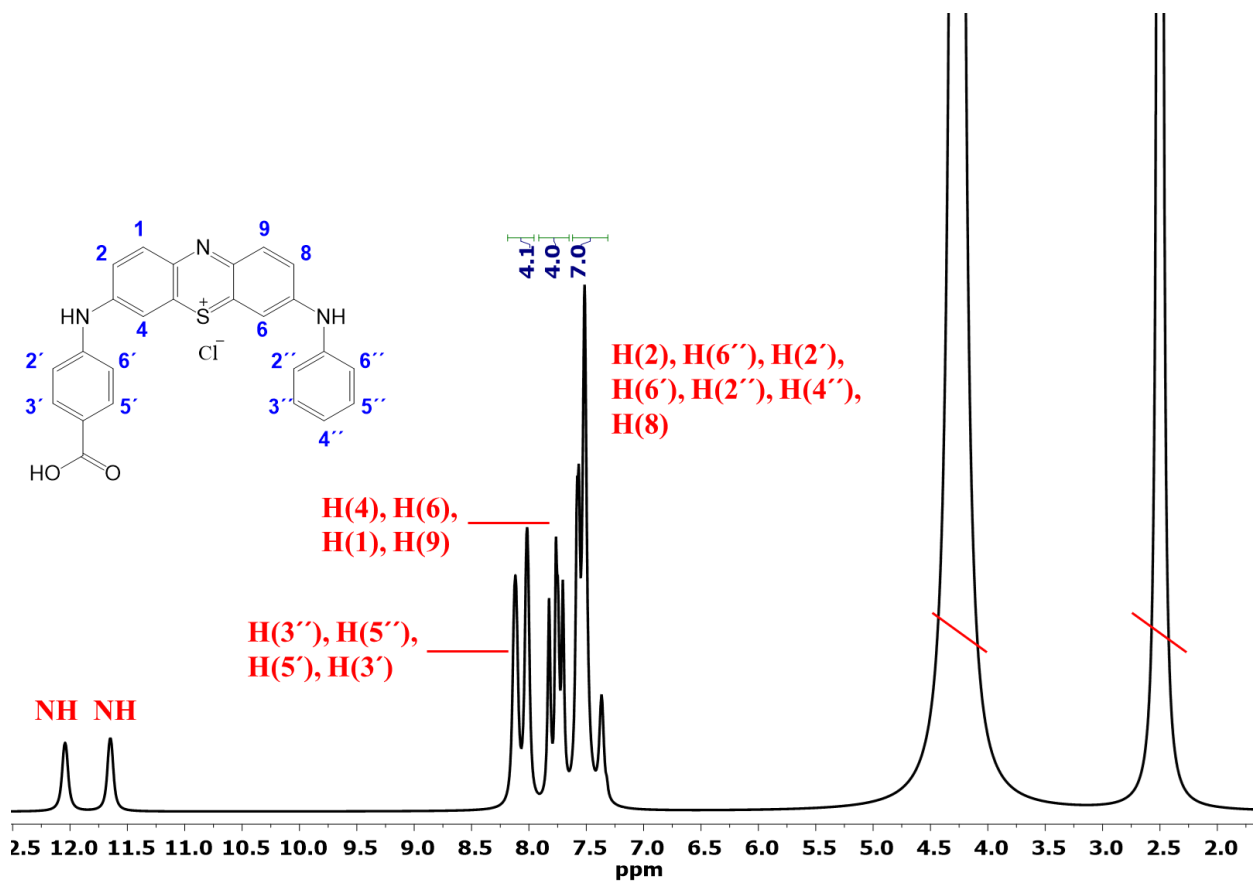

Figure S18. <sup>1</sup>H NMR spectrum of the compound 24, DMSO-*d*<sub>6</sub>, 300 K, 400 MHz.

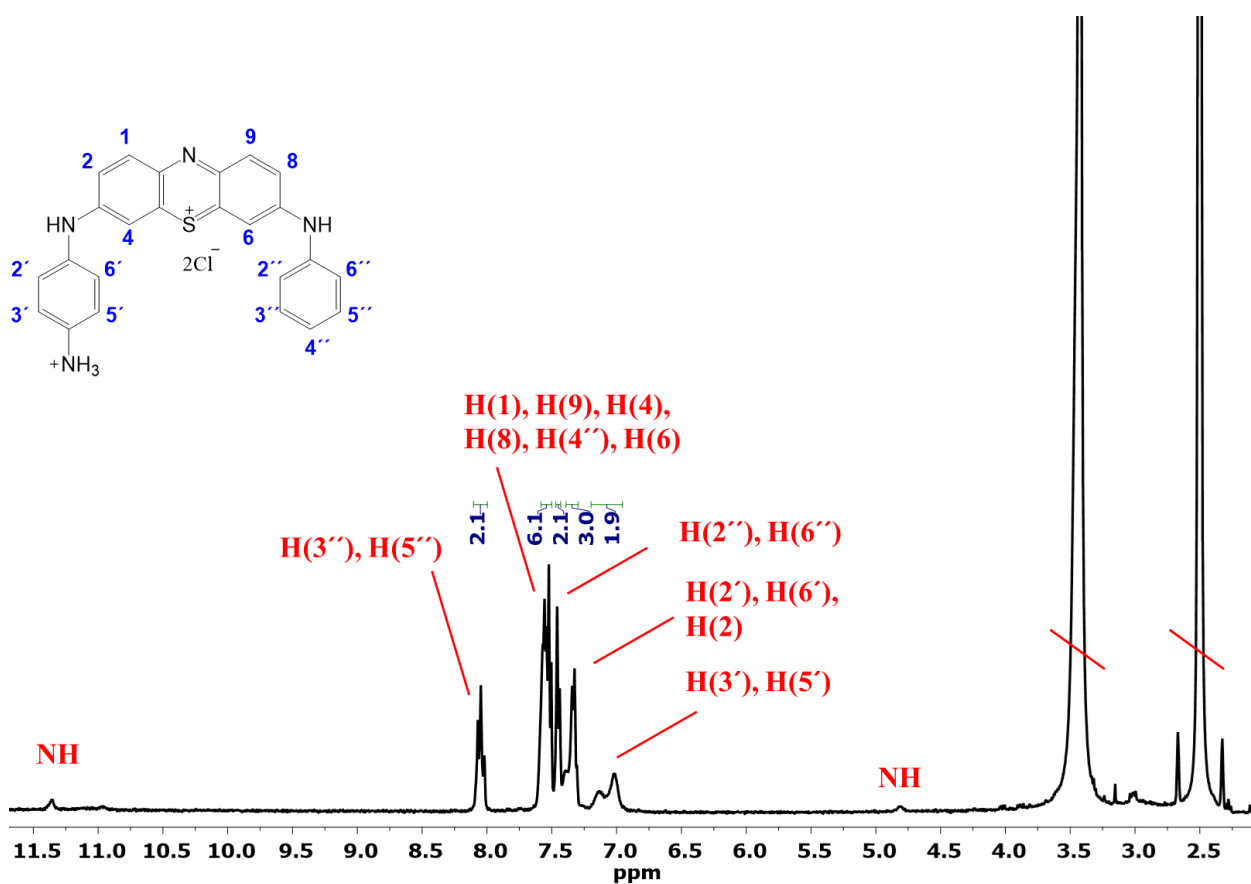

Figure S19.  $^1\text{H}$  NMR spectrum of the compound **25**,  $\text{DMSO-}d_6$ , 300 K, 400 MHz.

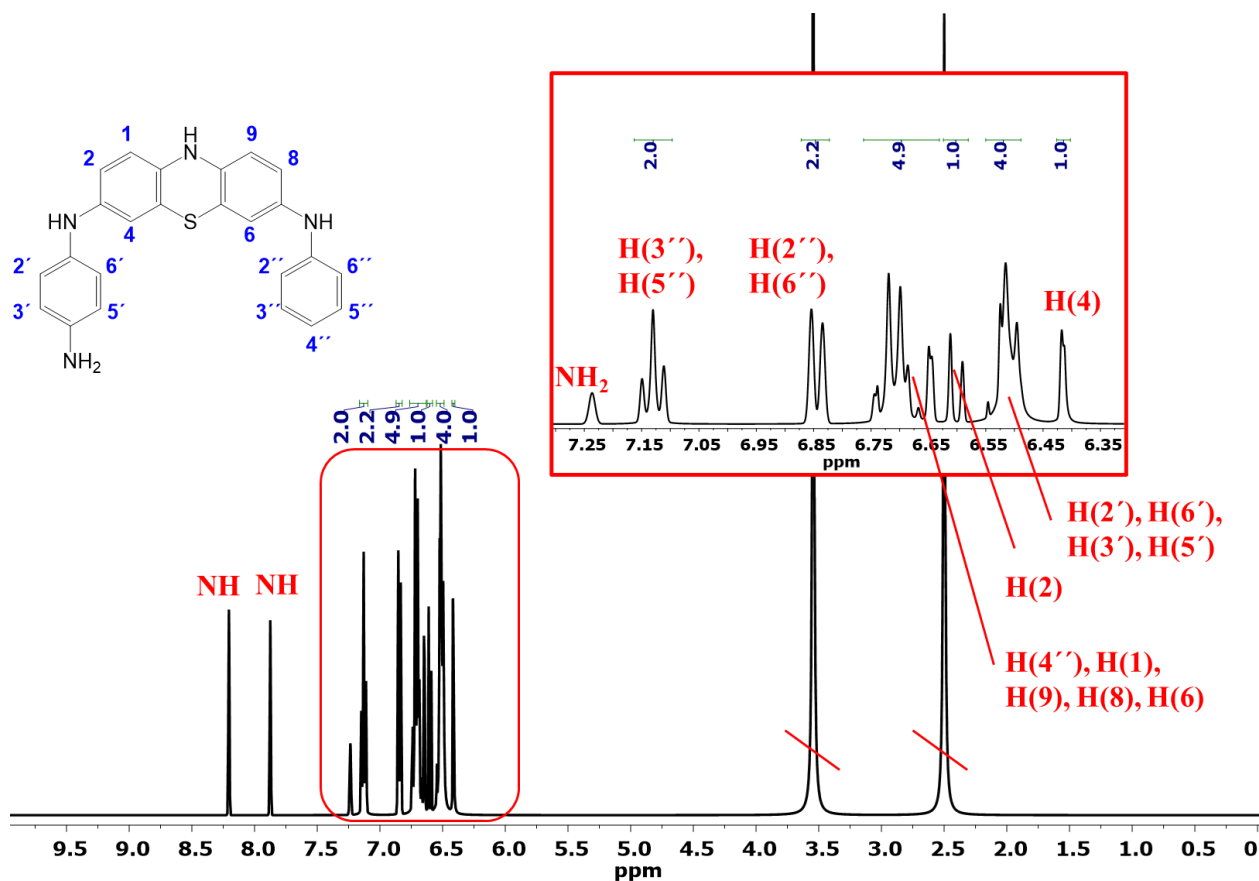

Figure S20.  $^1\text{H}$  NMR spectrum of leuco form of the compound **25**,  $\text{DMSO-}d_6 + 2\% \text{N}_2\text{H}_4 \cdot \text{H}_2\text{O}$ , 300 K, 400 MHz.

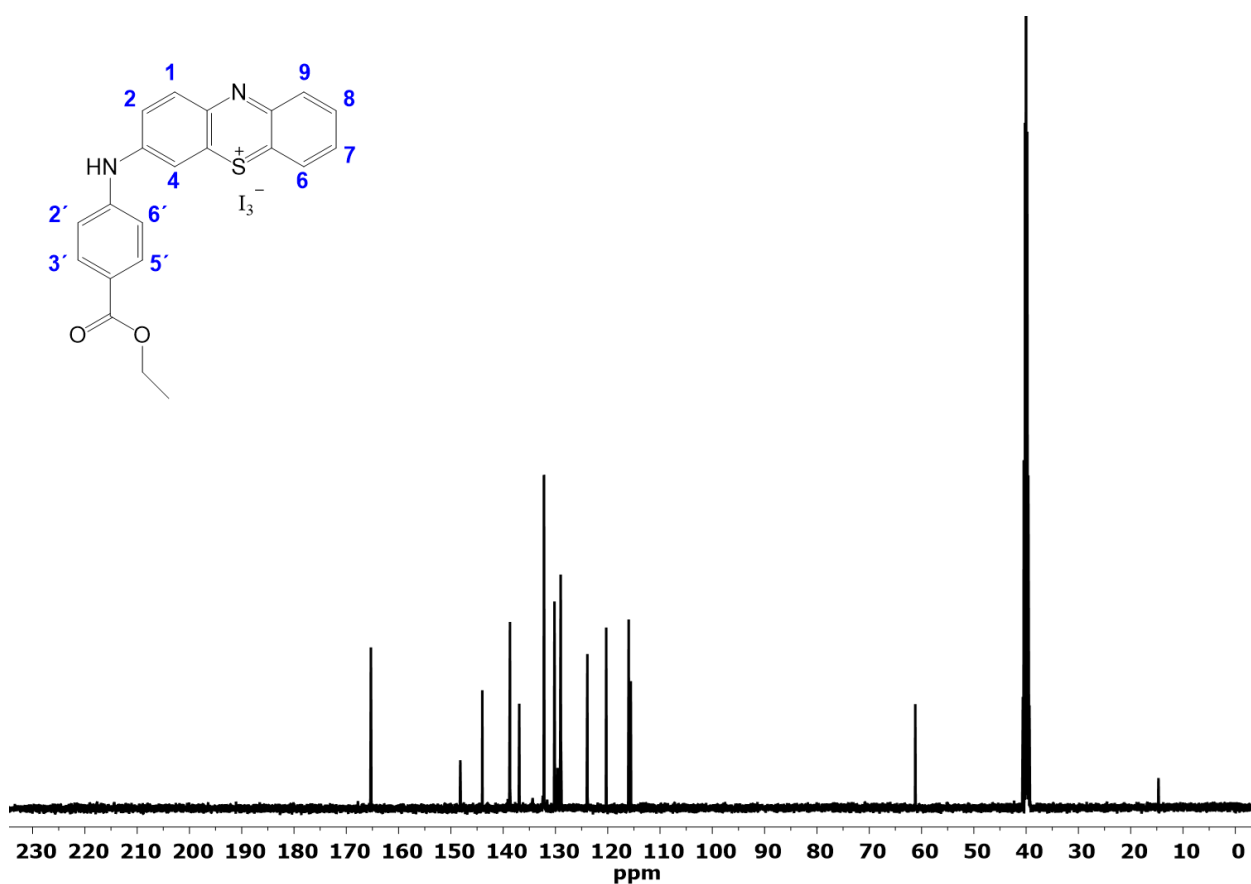

Figure S21. <sup>13</sup>C NMR spectrum of the compound **10**, DMSO-*d*<sub>6</sub>, 300 K, 100 MHz.

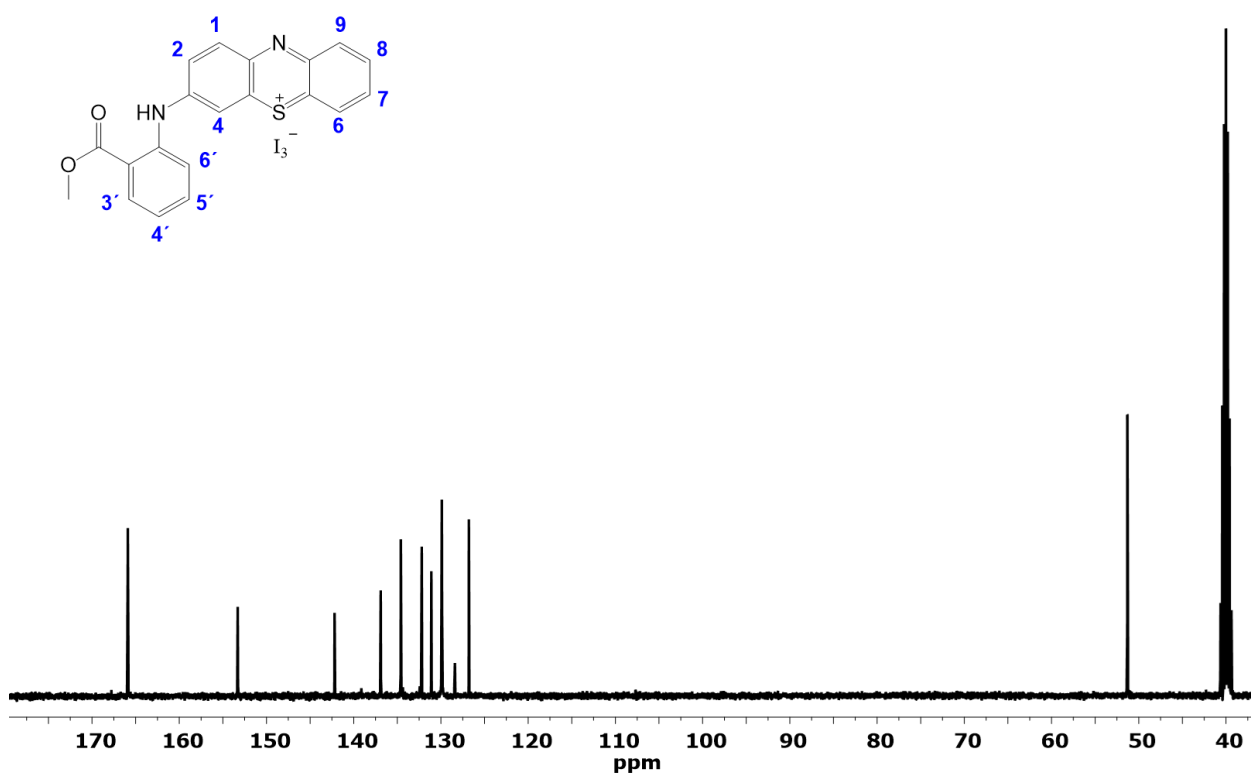

Figure S22. <sup>13</sup>C NMR spectrum of the compound **11**, DMSO-*d*<sub>6</sub>, 300 K, 100 MHz.

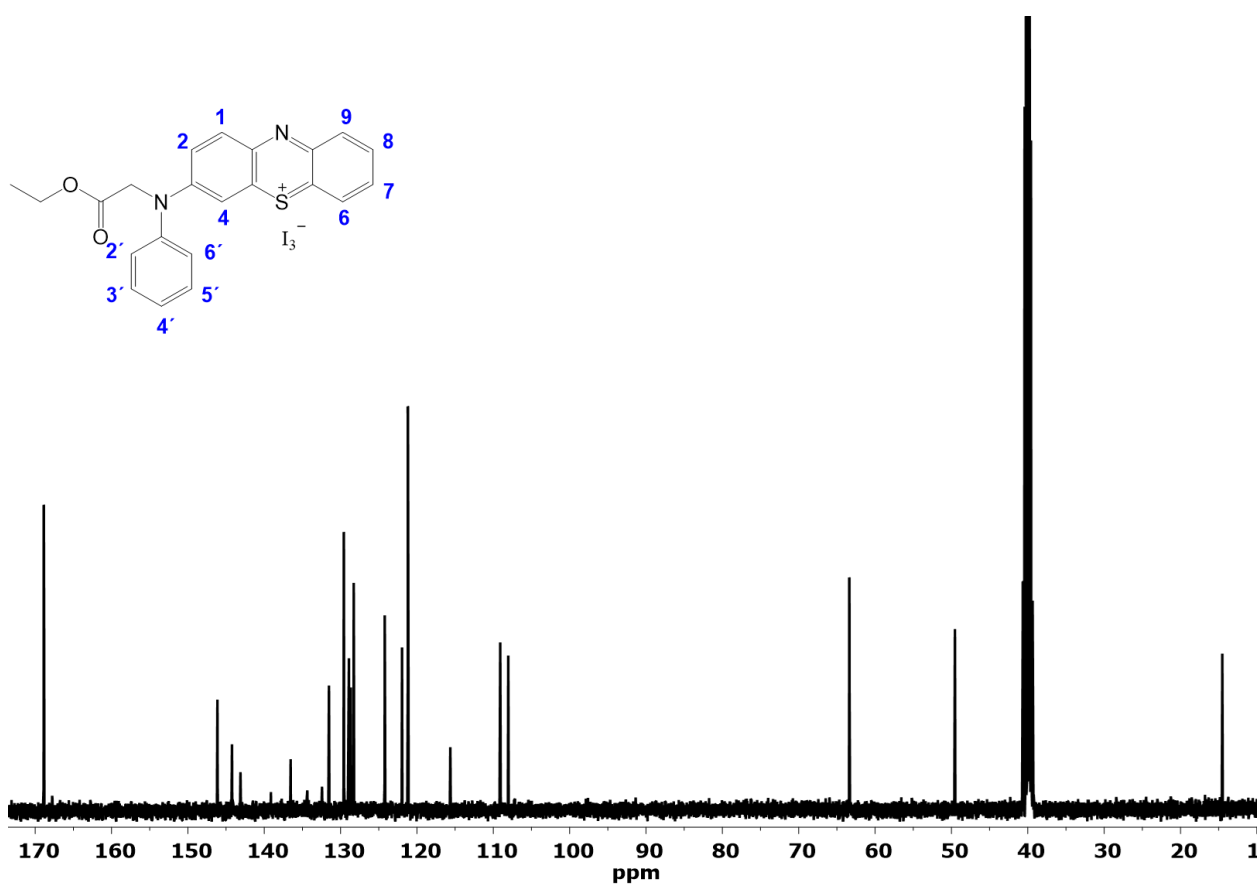

Figure S23. <sup>13</sup>C NMR spectrum of the compound **12**, DMSO-*d*<sub>6</sub>, 300 K, 100 MHz.

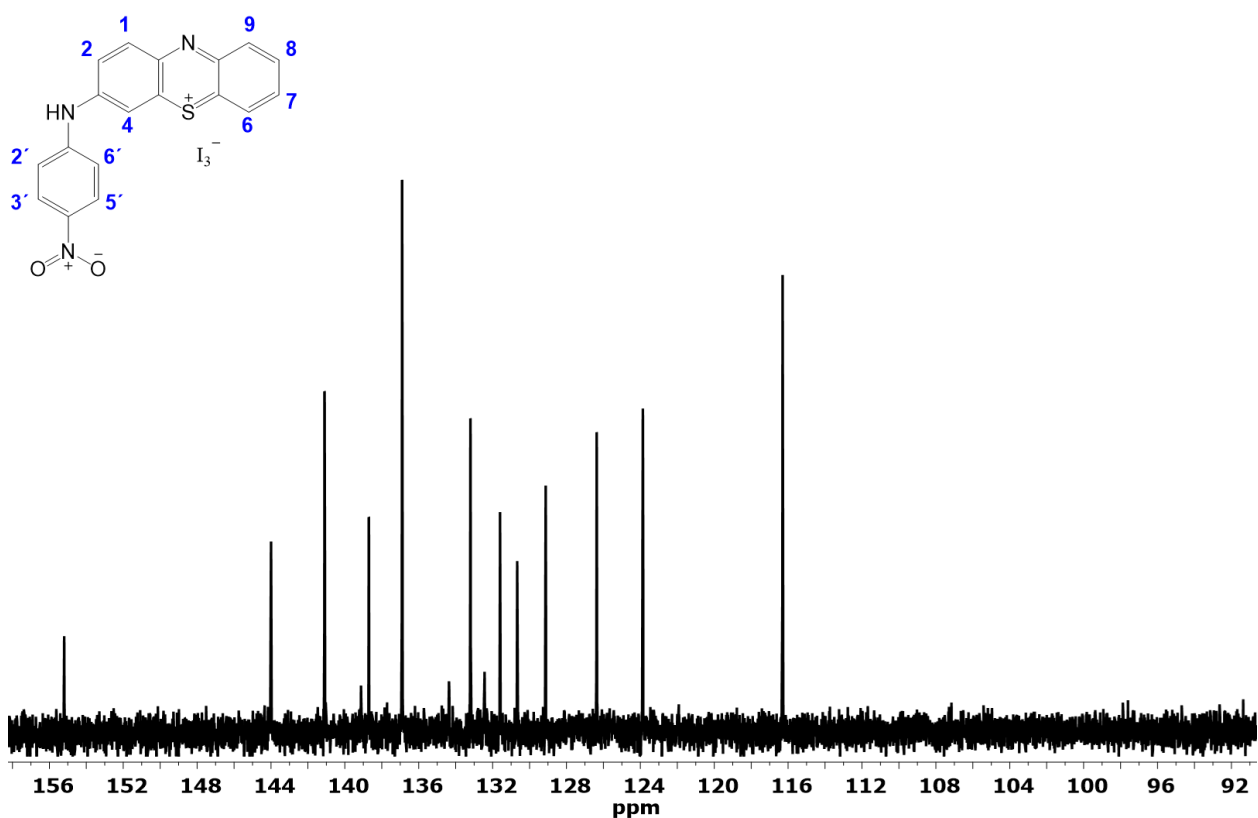

Figure S24. <sup>13</sup>C NMR spectrum of the compound **13**, DMSO-*d*<sub>6</sub>, 300 K, 100 MHz.

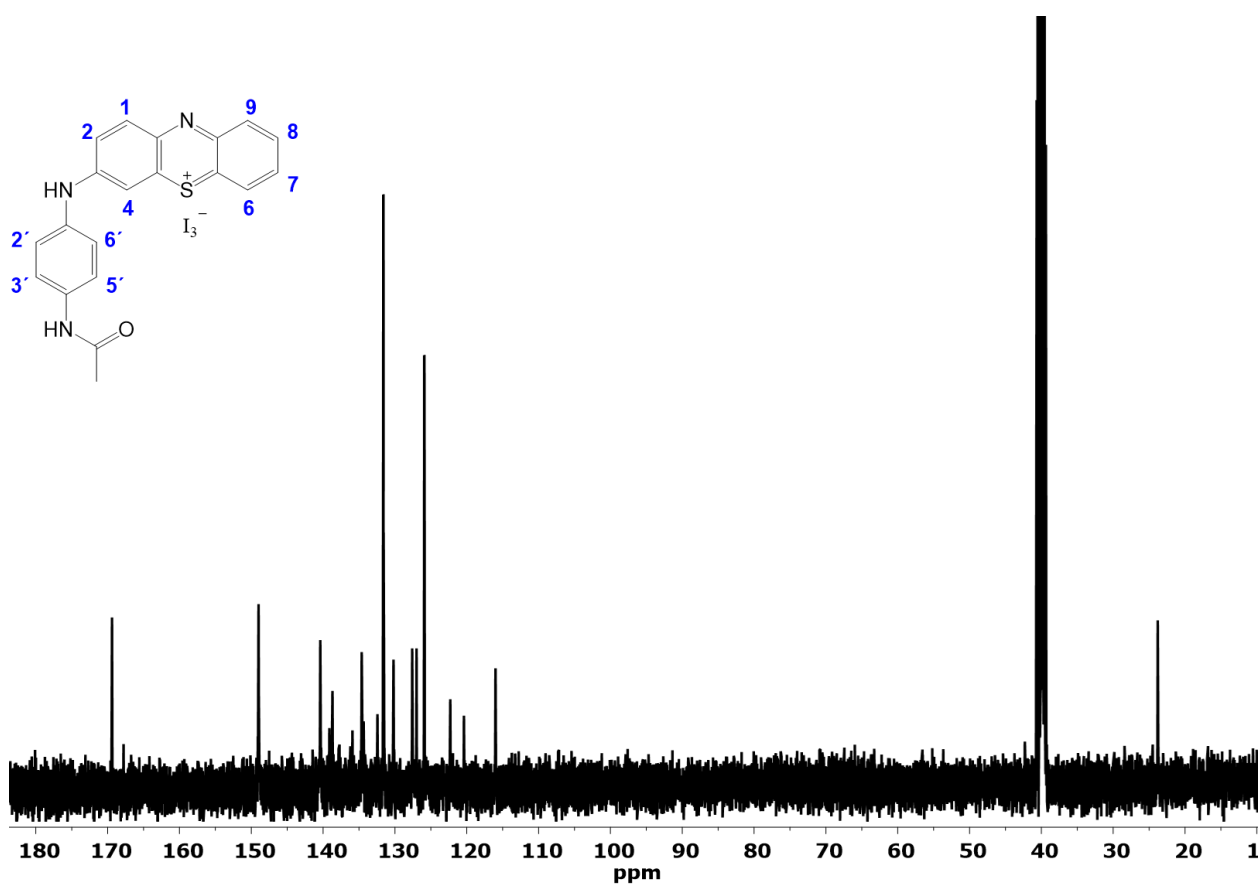

Figure S25. <sup>13</sup>C NMR spectrum of the compound **14**, DMSO-*d*<sub>6</sub>, 300 K, 100 MHz.

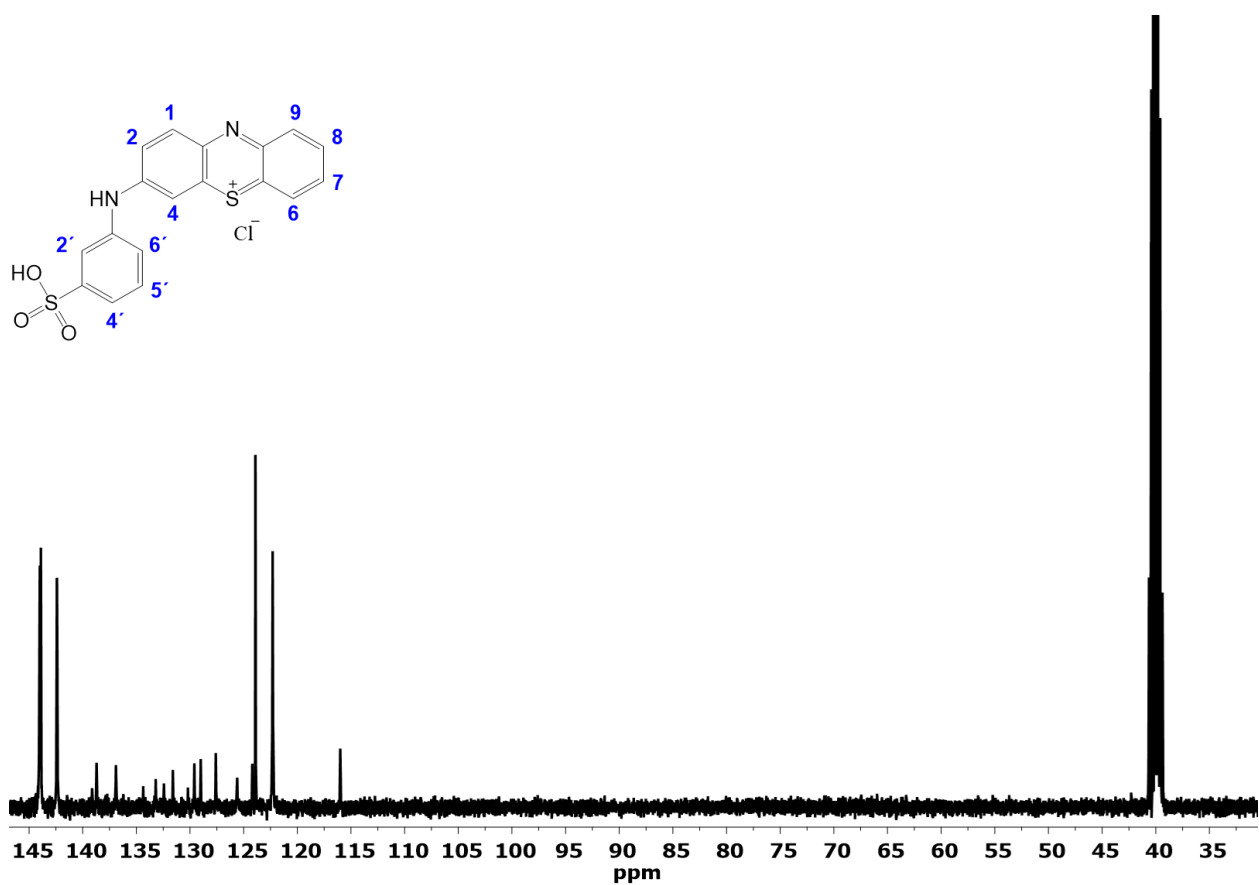

Figure S26. <sup>13</sup>C NMR spectrum of the compound **15**, DMSO-*d*<sub>6</sub>, 300 K, 100 MHz.

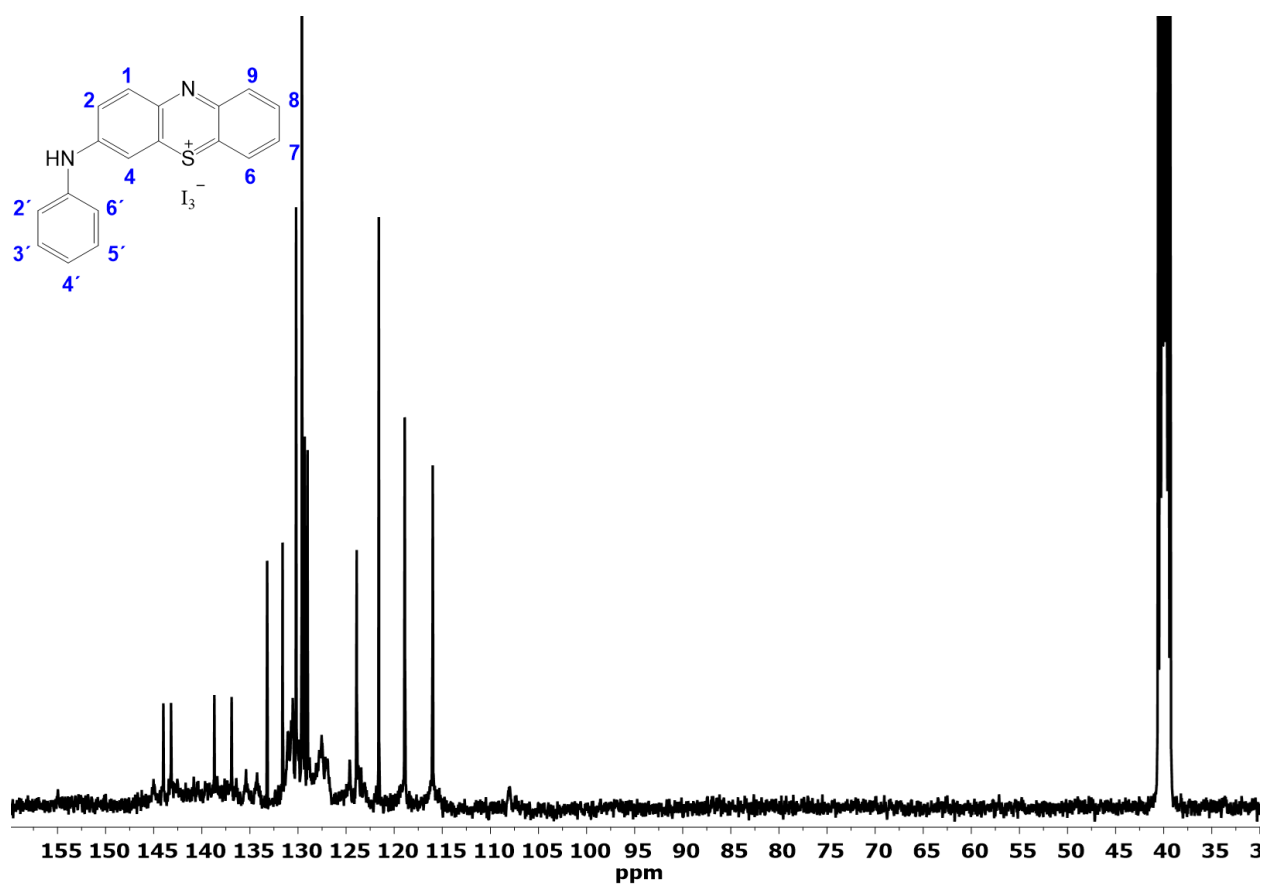

Figure S27.  $^{13}\text{C}$  NMR spectrum of the compound **16**,  $\text{DMSO-}d_6$ , 300 K, 100 MHz.

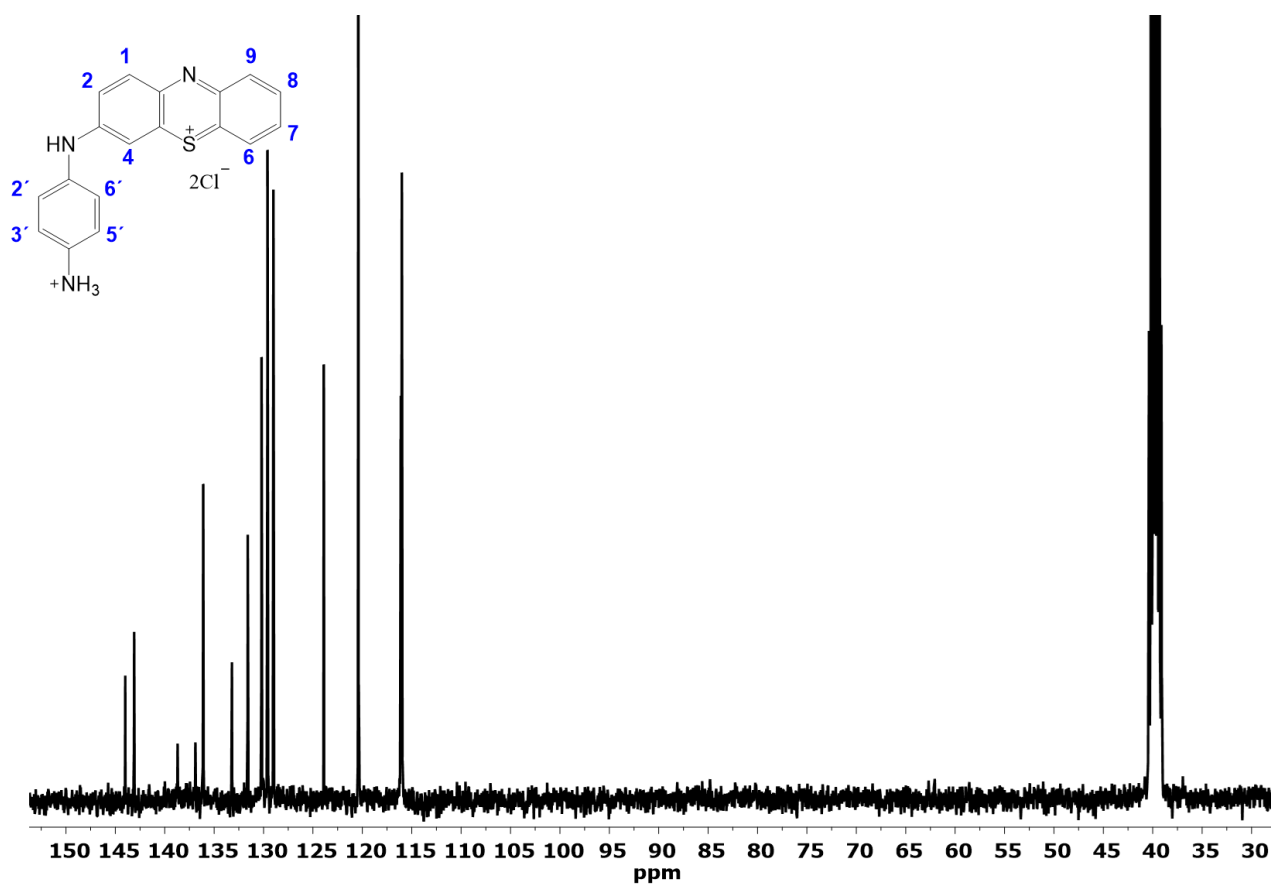

Figure S28.  $^{13}\text{C}$  NMR spectrum of the compound **17**,  $\text{DMSO-}d_6$ , 300 K, 100 MHz.



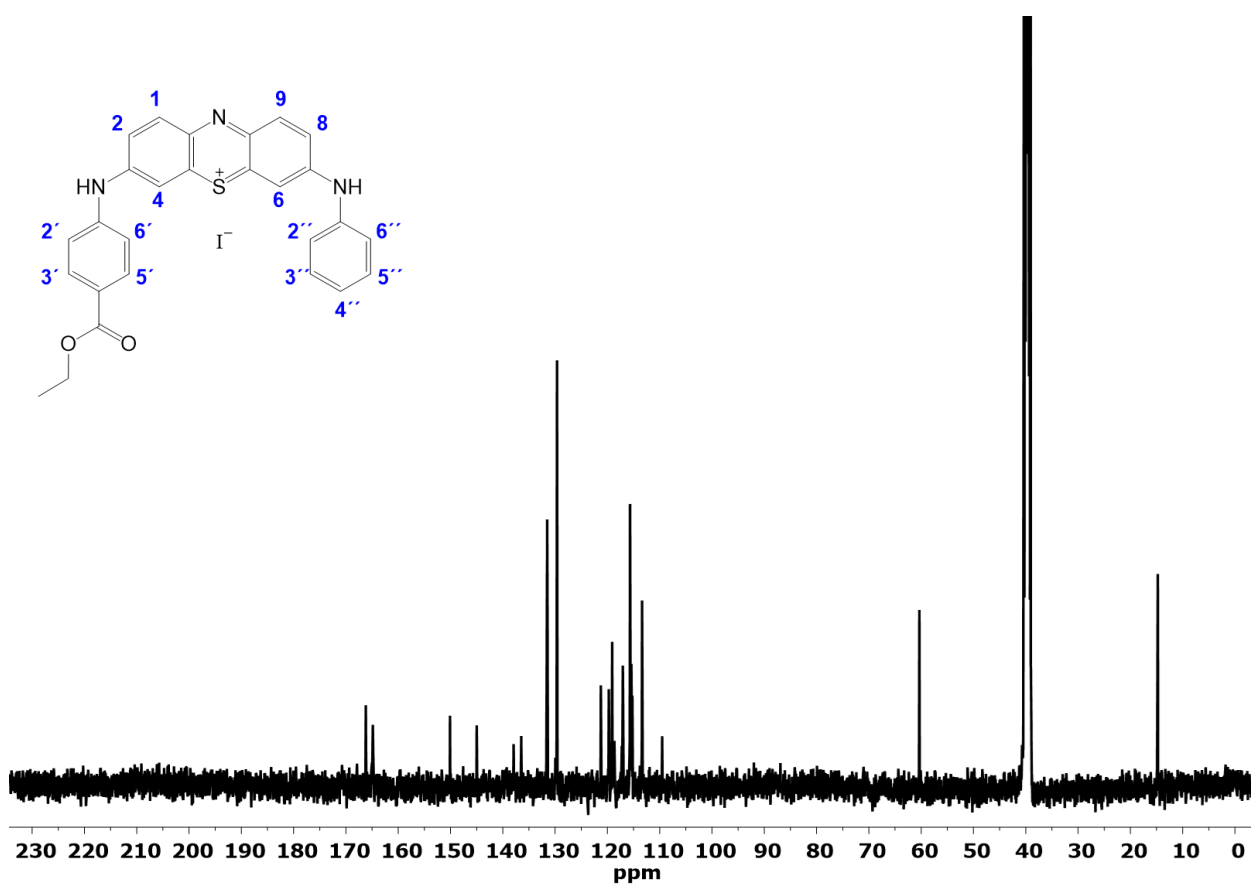

Figure S29.  $^{13}\text{C}$  NMR spectrum of the compound **18**,  $\text{DMSO}-d_6$ , 300 K, 100 MHz.

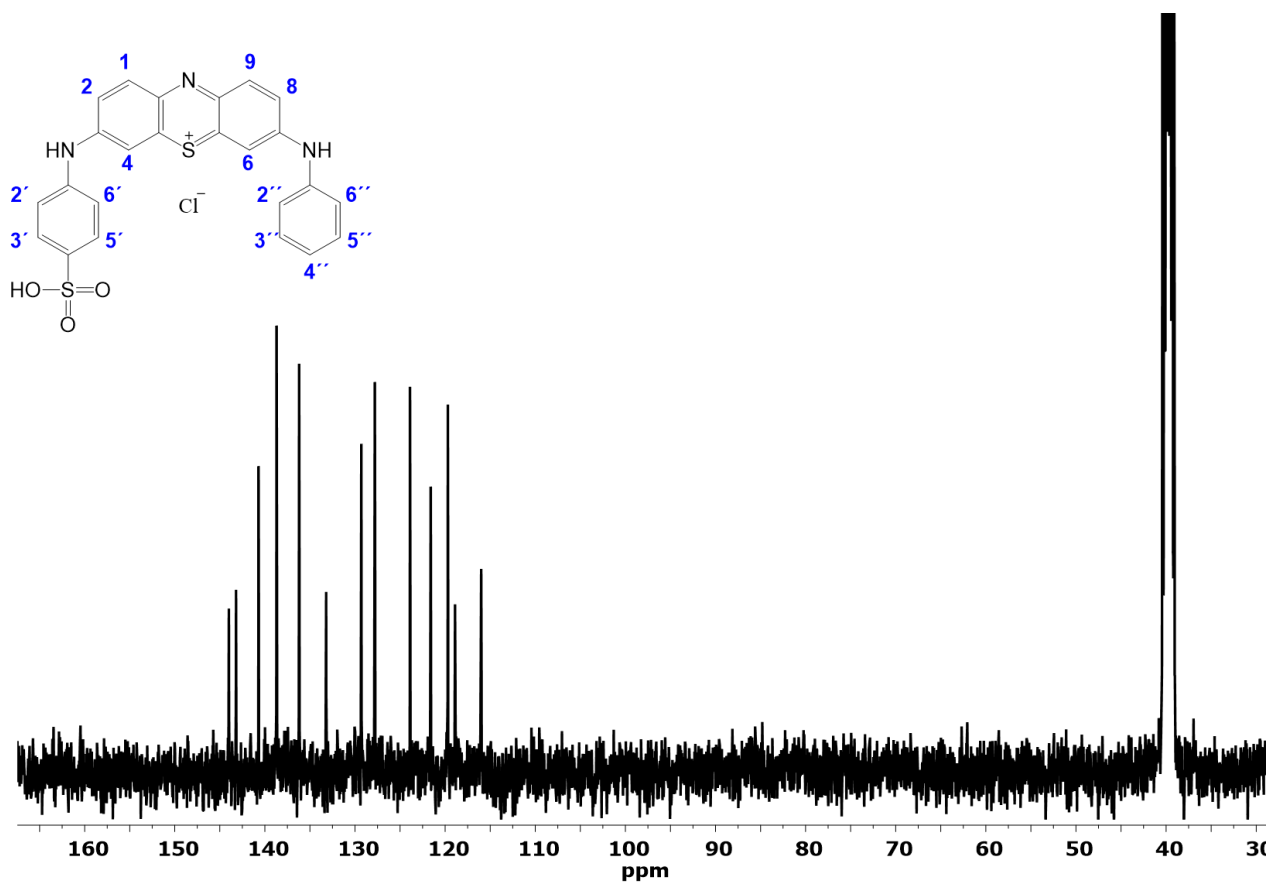

Figure S30.  $^{13}\text{C}$  NMR spectrum of the compound **19**,  $\text{DMSO}-d_6$ , 300 K, 100 MHz.

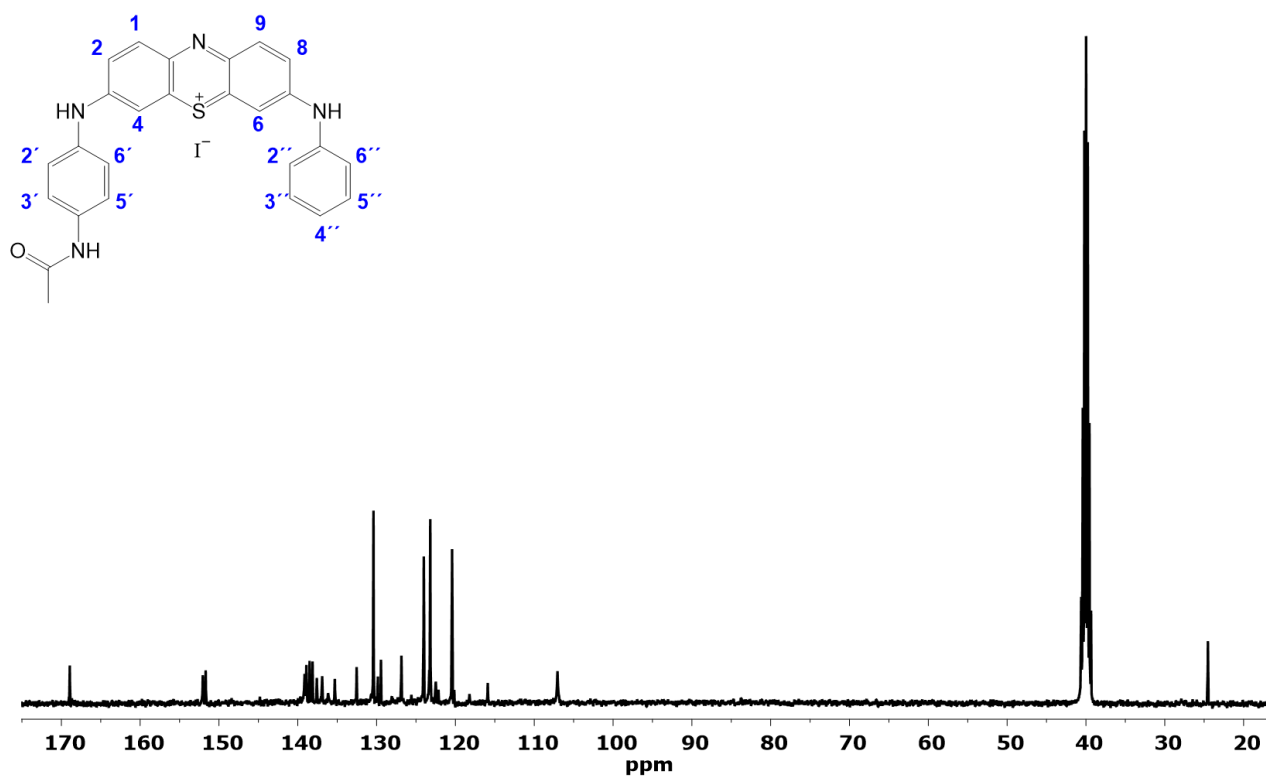

Figure S31.  $^{13}\text{C}$  NMR spectrum of the compound **20**,  $\text{DMSO-}d_6$ , 300 K, 100 MHz.

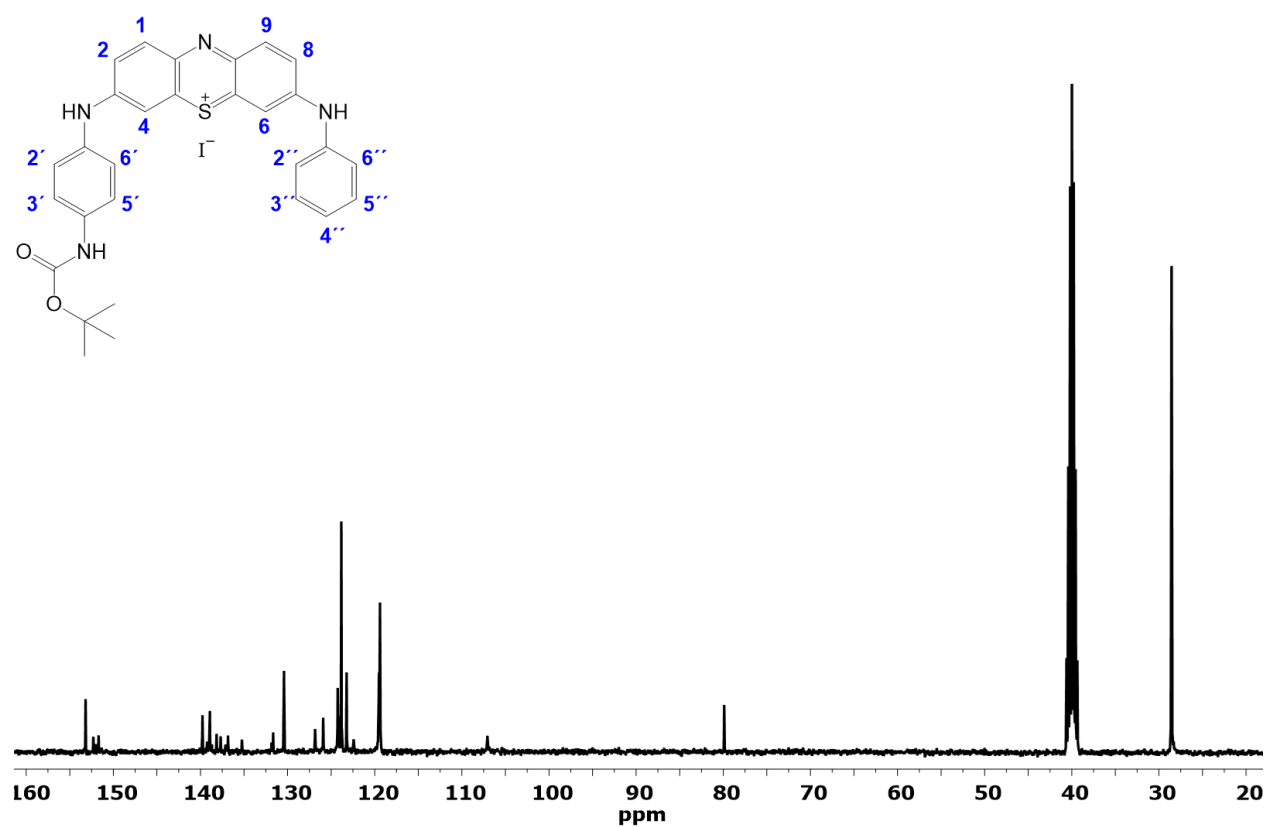

Figure S32.  $^{13}\text{C}$  NMR spectrum of the compound **21**,  $\text{DMSO-}d_6$ , 300 K, 100 MHz.

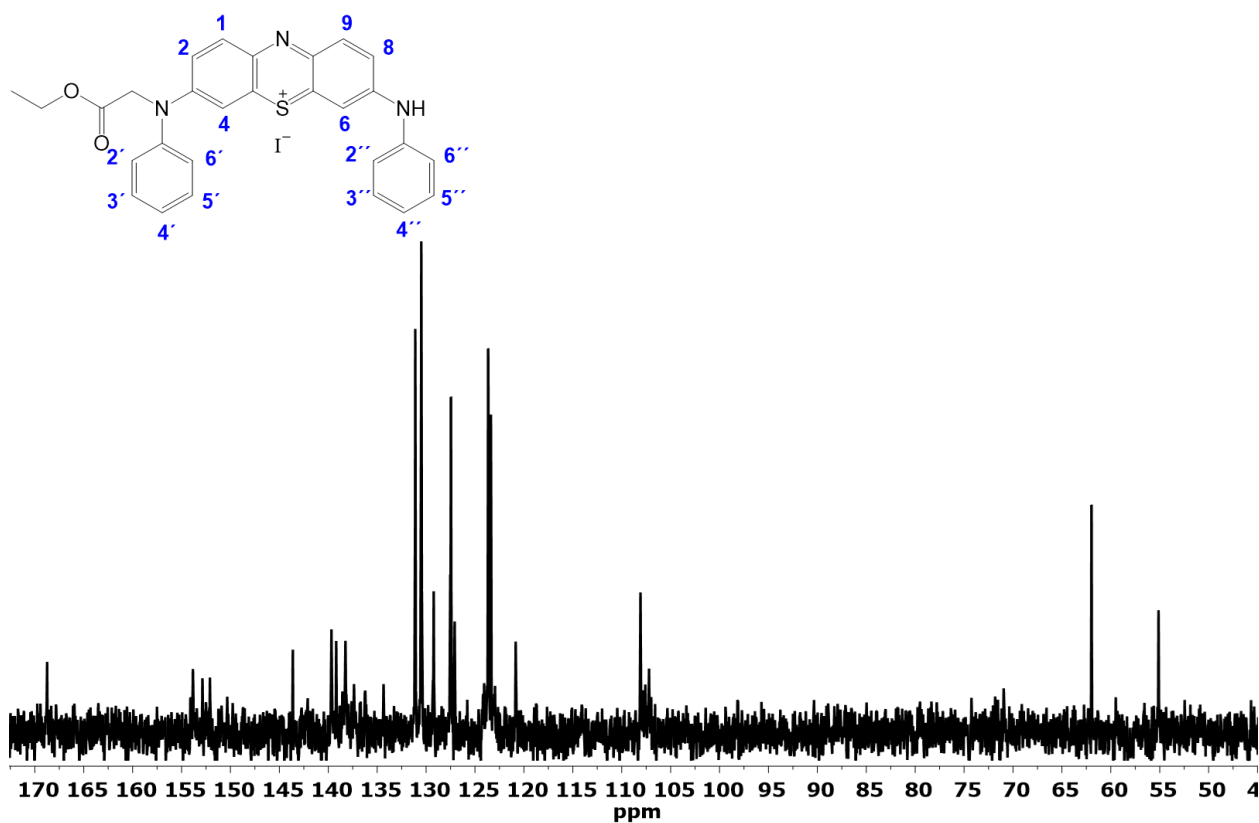

Figure S33.  $^{13}\text{C}$  NMR spectrum of the compound **22**,  $\text{DMSO-}d_6$ , 300 K, 100 MHz.

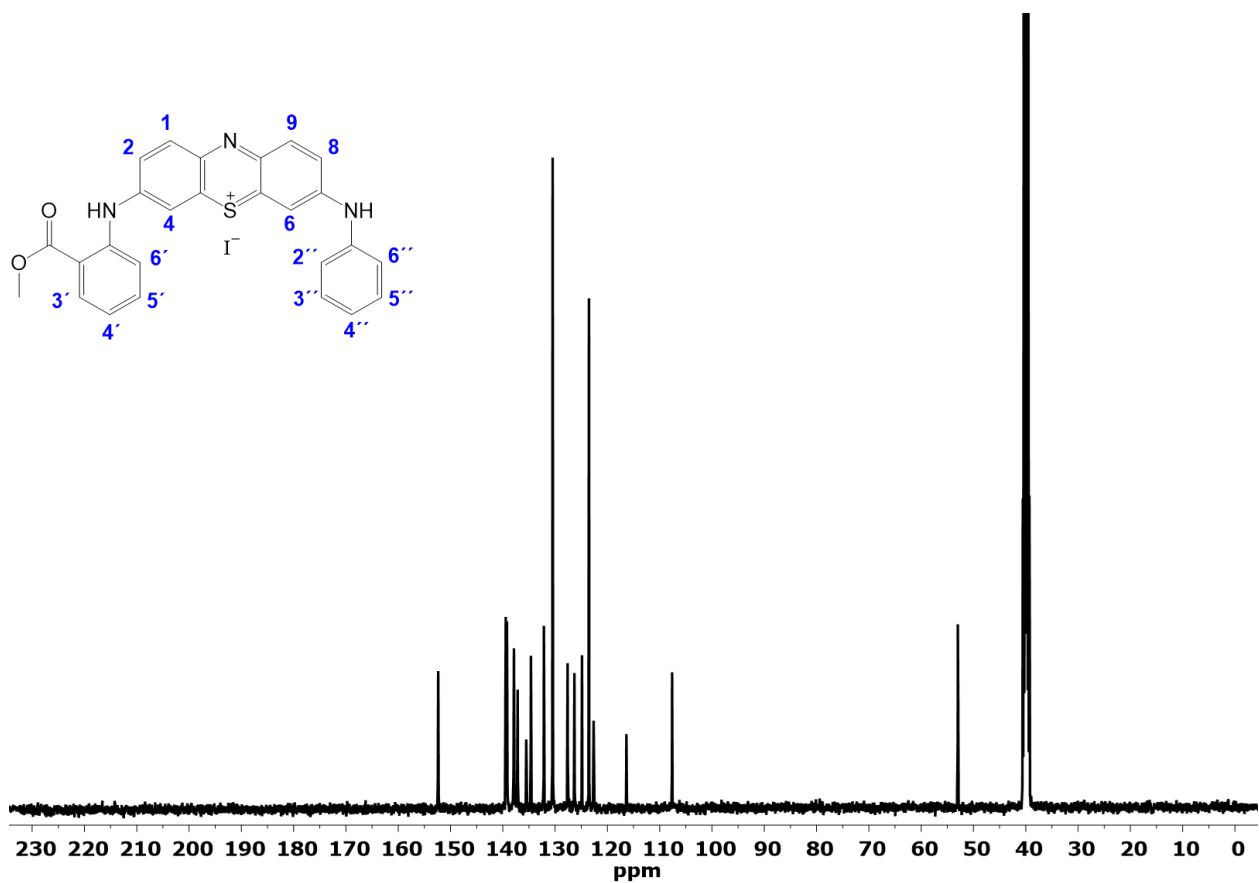

Figure S34.  $^{13}\text{C}$  NMR spectrum of the compound **23**,  $\text{DMSO-}d_6$ , 300 K, 100 MHz.

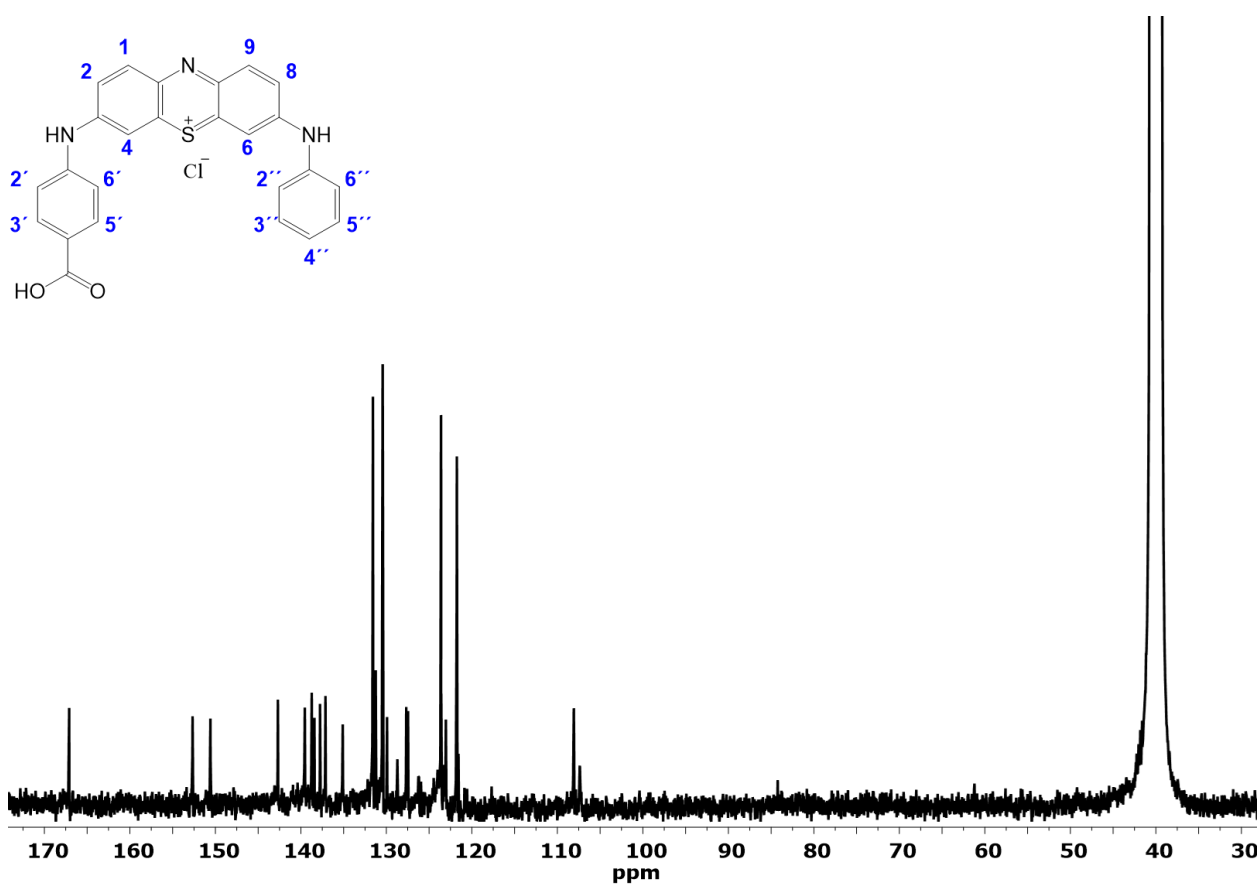

Figure S35. <sup>13</sup>C NMR spectrum of the compound **24**, DMSO-*d*<sub>6</sub>, 300 K, 100 MHz.

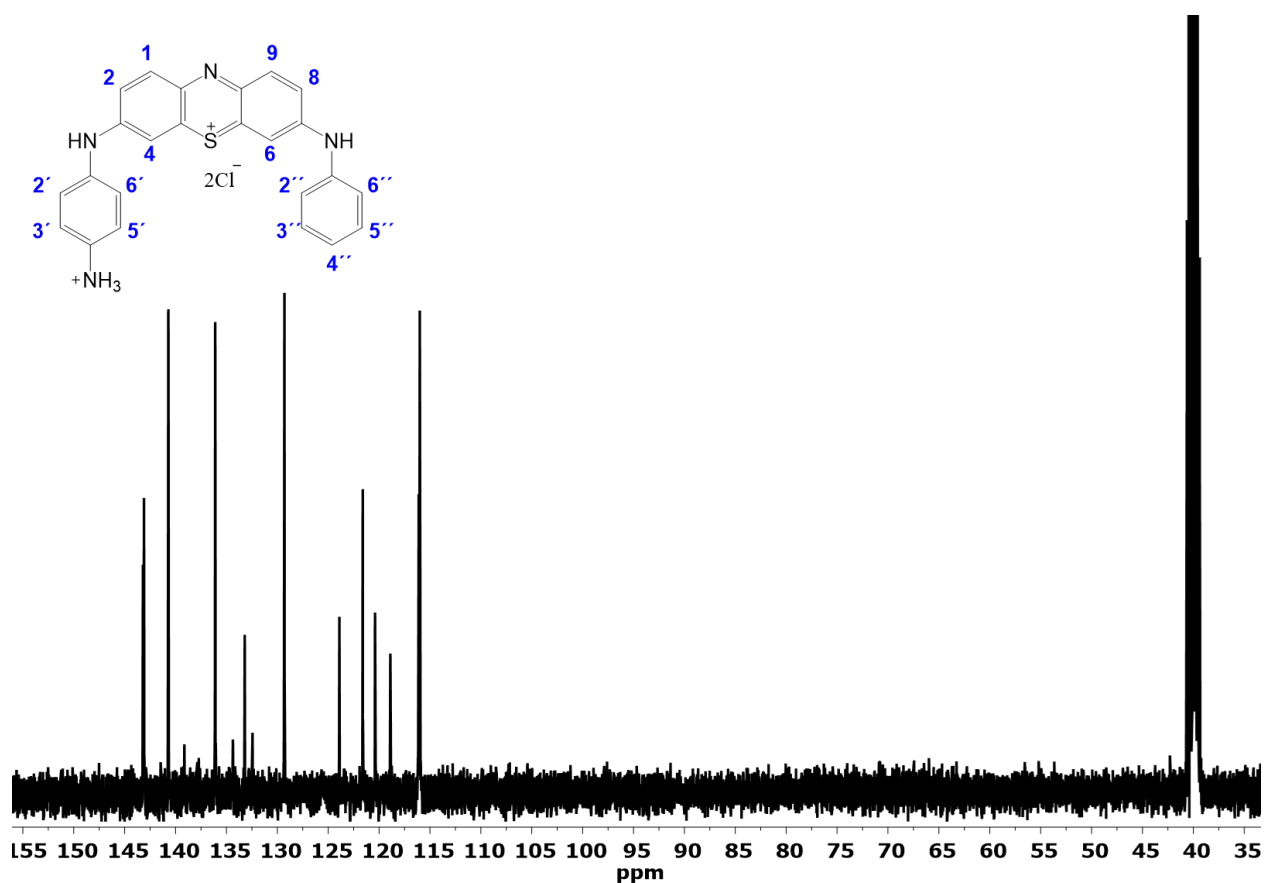

Figure S36. <sup>13</sup>C NMR spectrum of the compound **25**, DMSO-*d*<sub>6</sub>, 300 K, 100 MHz.

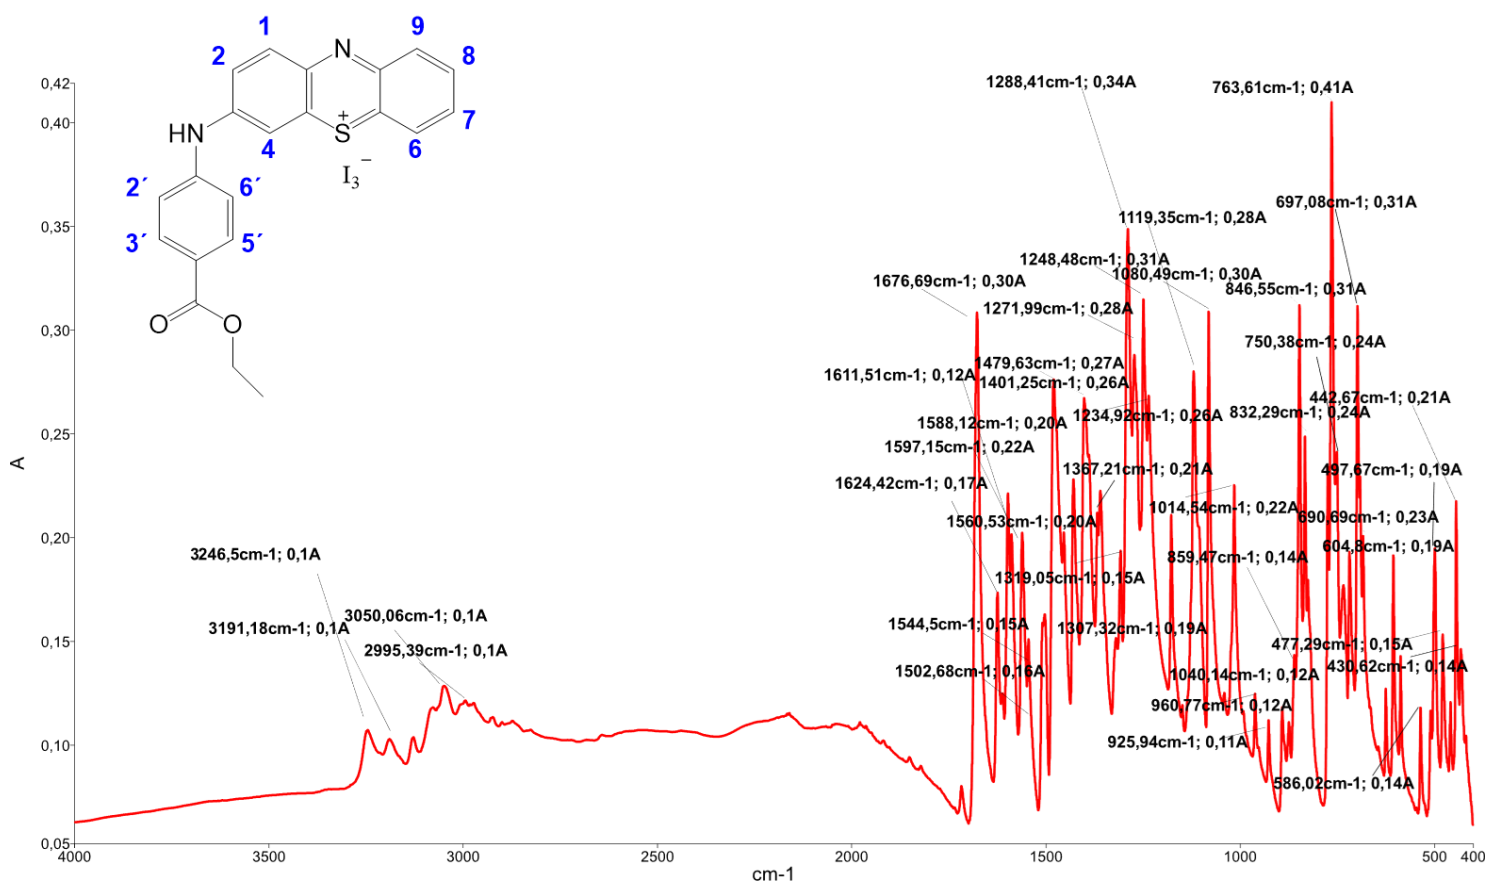

Figure S37. FT-IR spectrum of the compound 10.

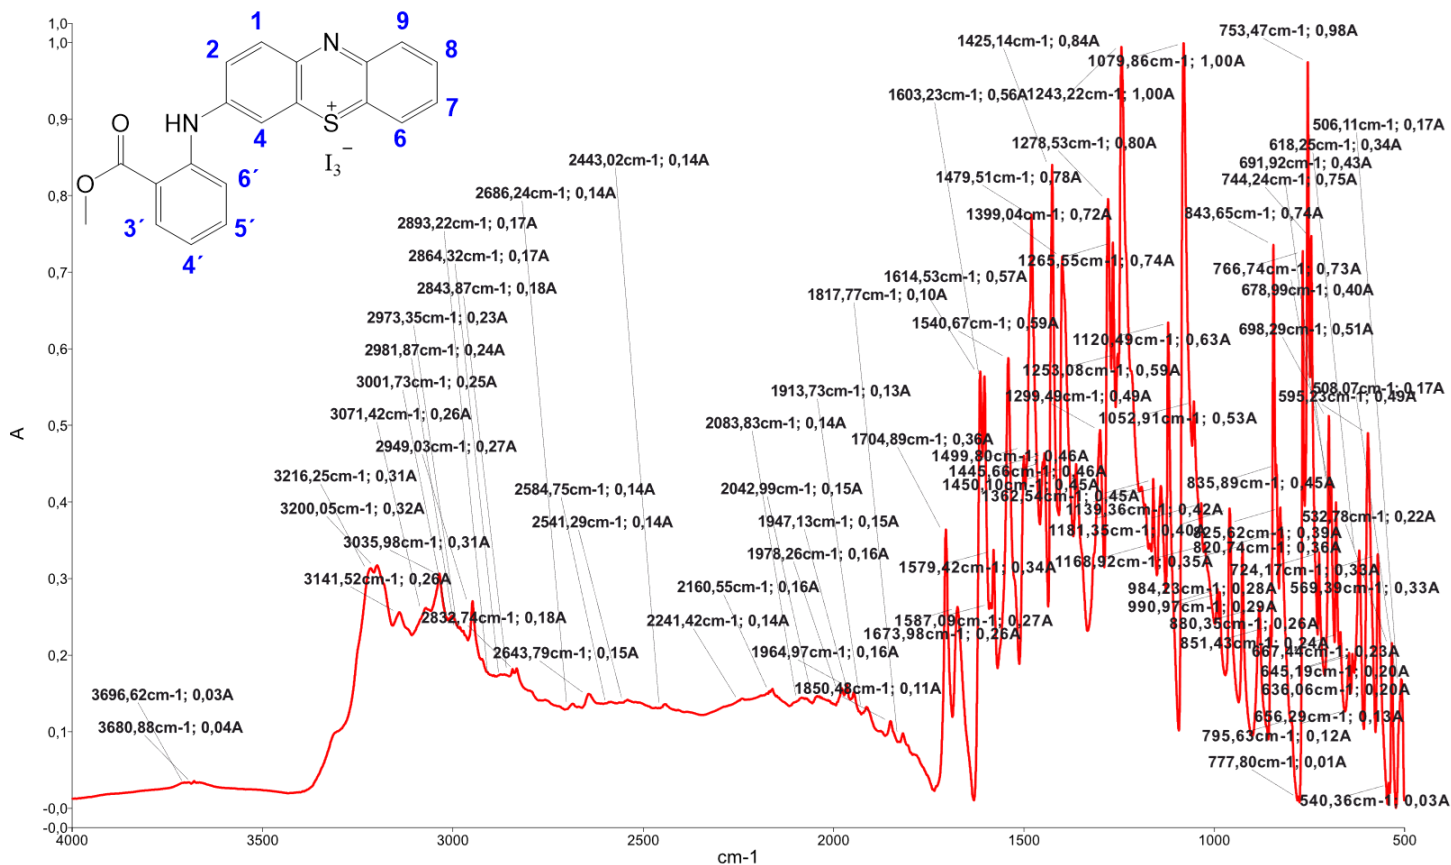

Figure S38. FT-IR spectrum of the compound 11.

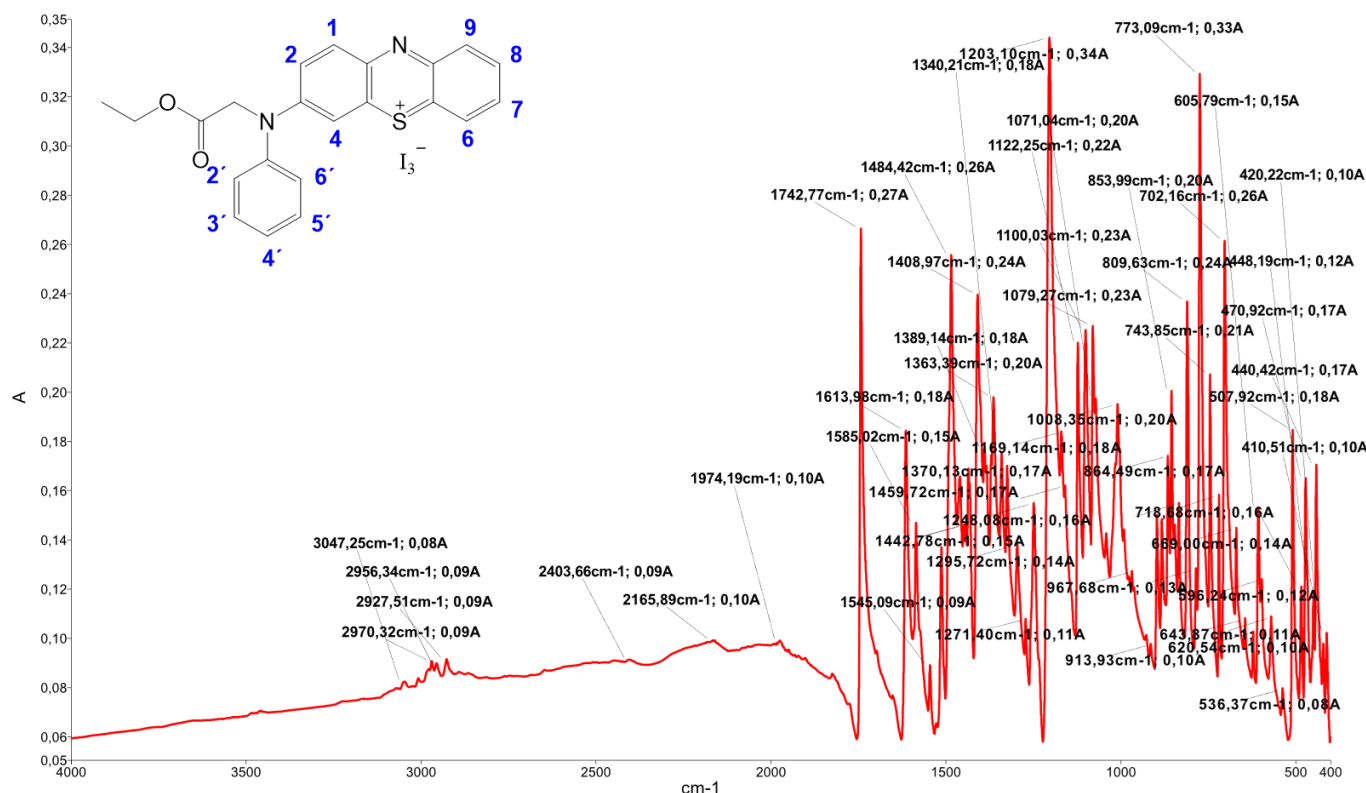

Figure S39. FT-IR spectrum of the compound 12.

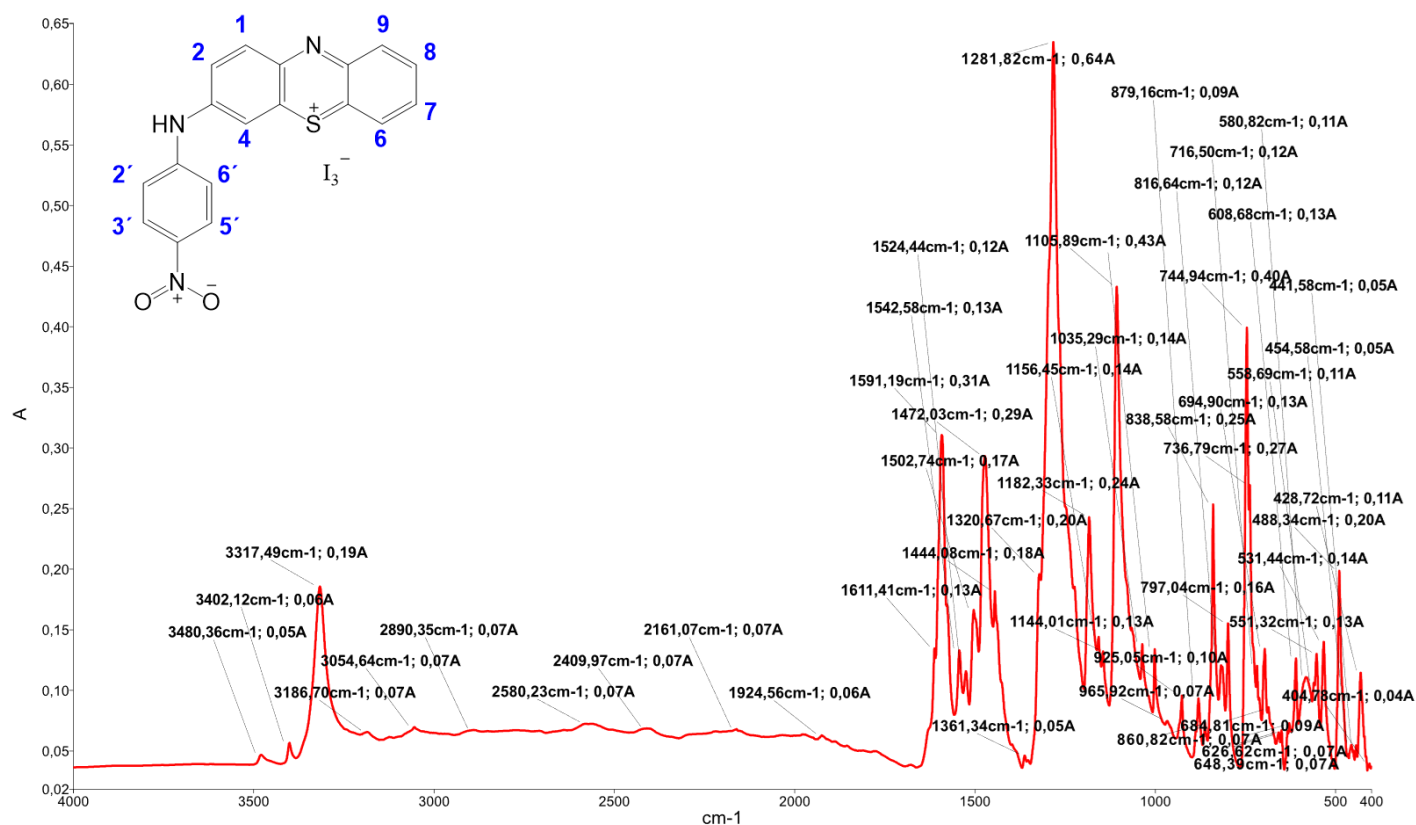

Figure S40. FT-IR spectrum of the compound 13.

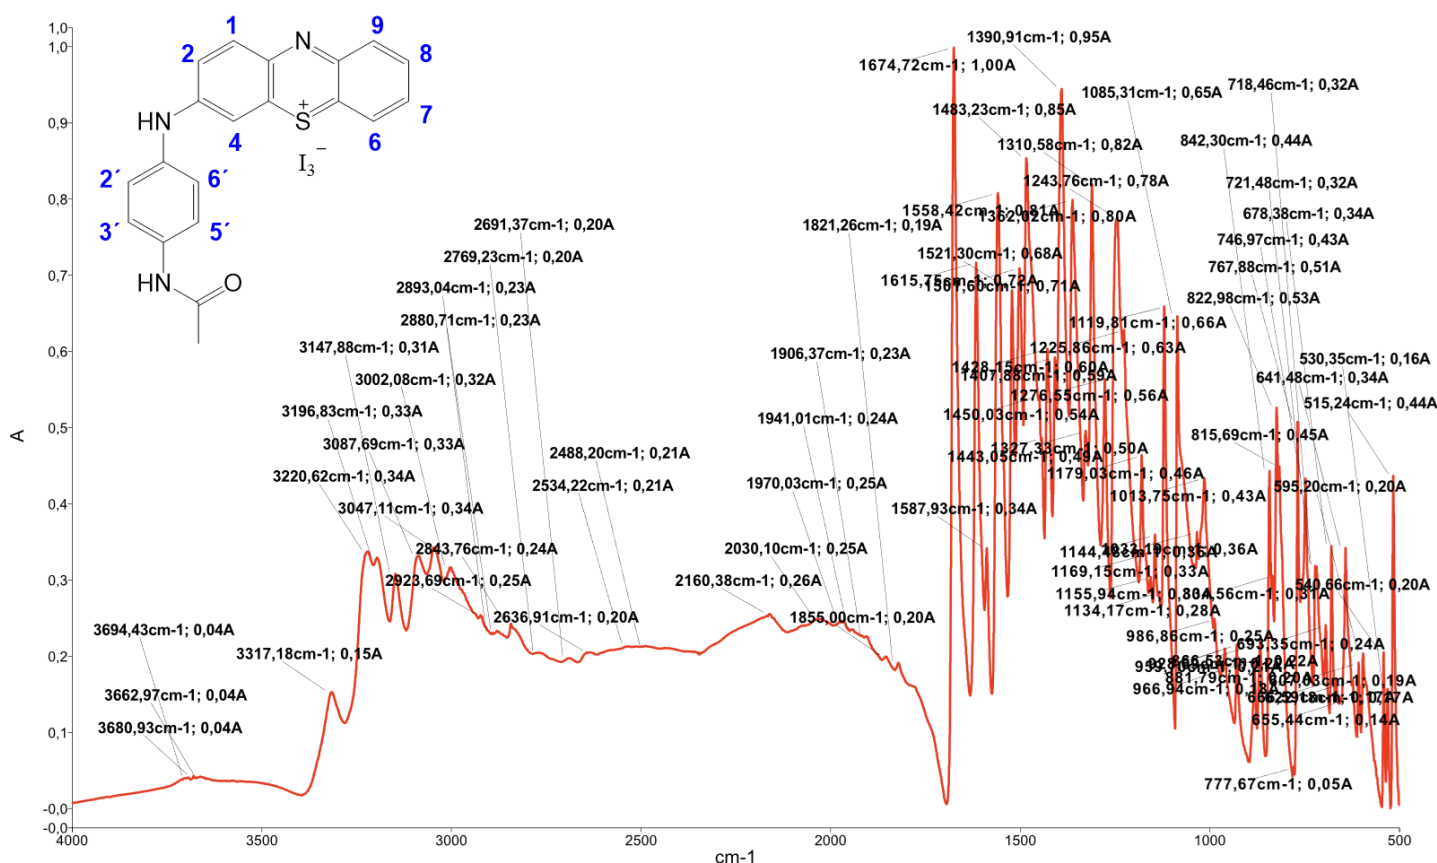

Figure S41. FT-IR spectrum of the compound 14.

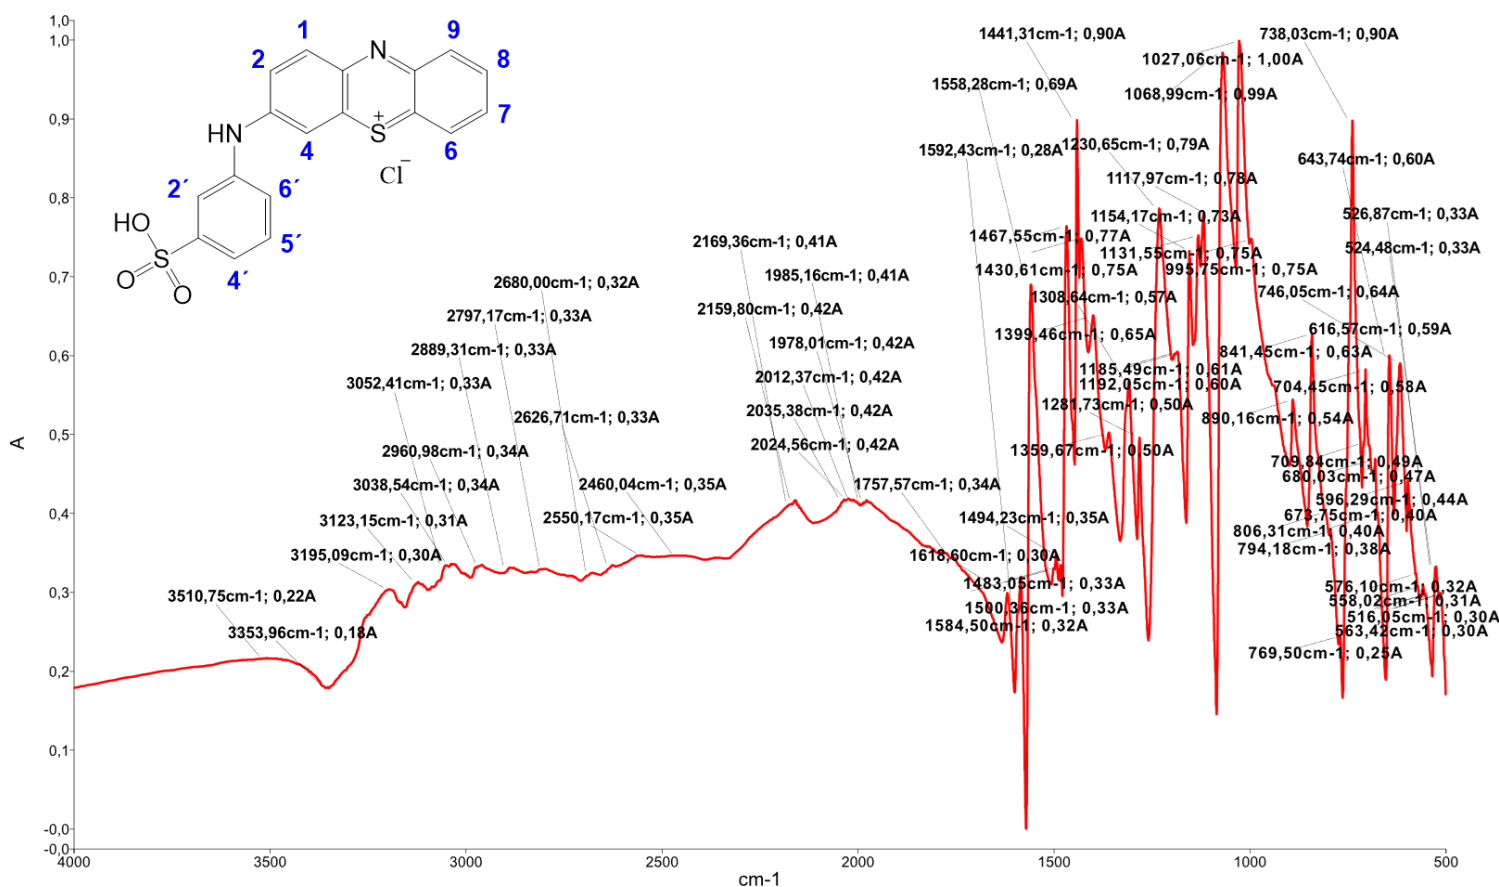

Figure S42. FT-IR spectrum of the compound 15.



FTIR spectrum of the ionic liquid [1,1'-bis(4-aminophenyl)-2,2'-bithiazole]<sup>+</sup> 2Cl<sup>-</sup> in the range of 4000-400 cm<sup>-1</sup>. The chemical structure of the cation is shown as an inset, with atoms numbered 1 through 9. The spectrum is labeled with various peak wavenumbers and their corresponding assignments (e.g., 3210.41cm<sup>-1</sup>; 0,15A, 1506.99cm<sup>-1</sup>; 0,33A).

Figure S44. FT-IR spectrum of the compound **17**.



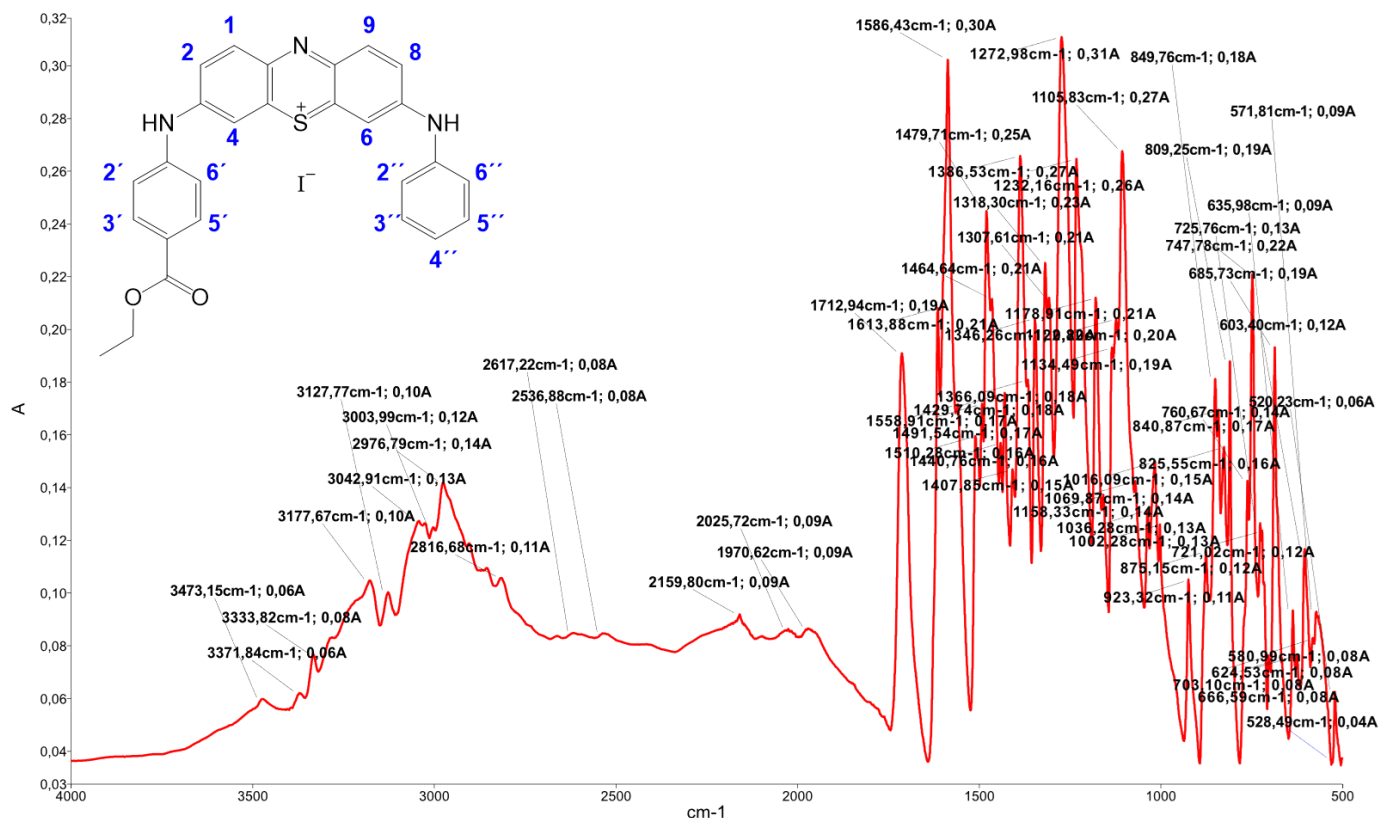

Figure S45. FT-IR spectrum of the compound 18.

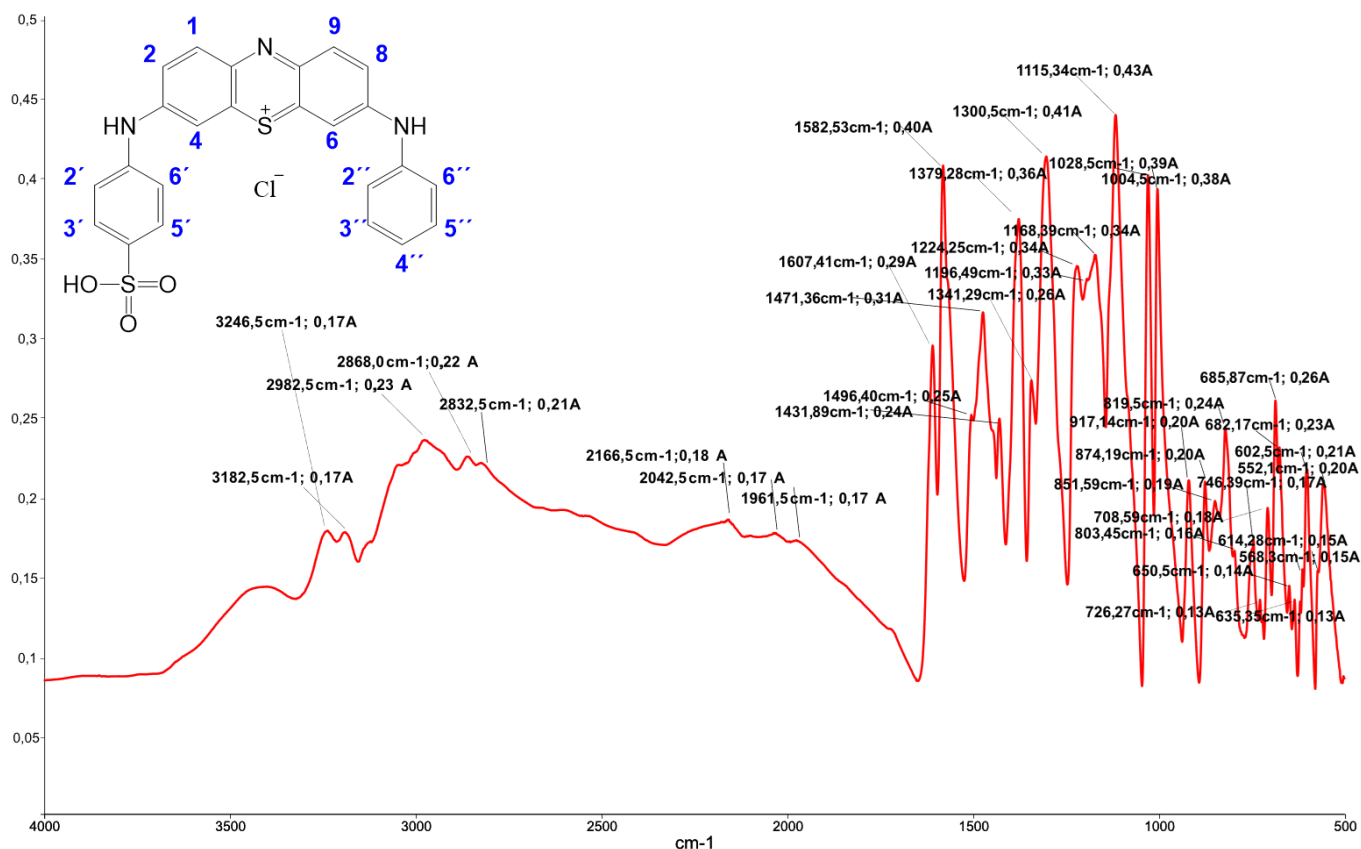

Figure S46. FT-IR spectrum of the compound 19.

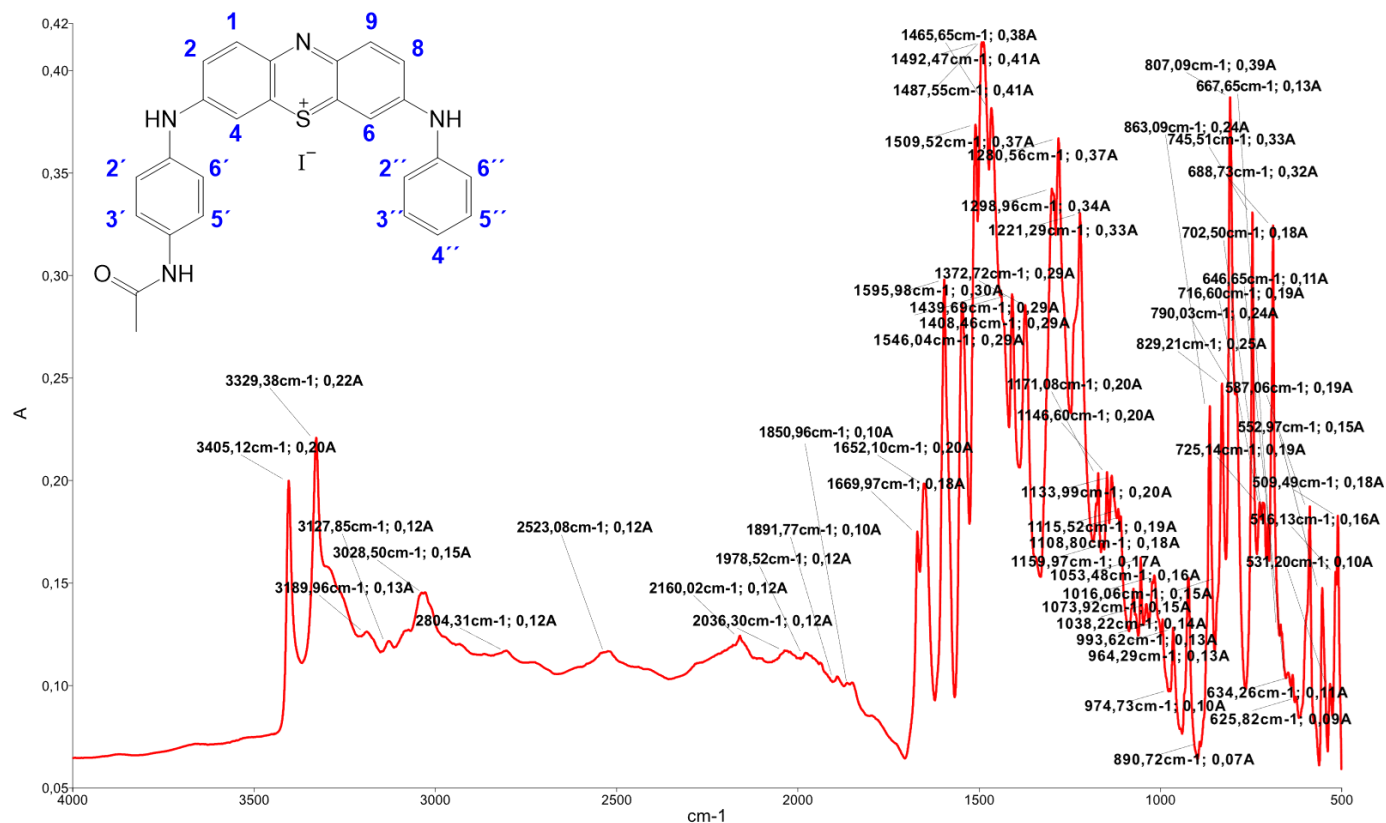

Figure S47. FT-IR spectrum of the compound 20.

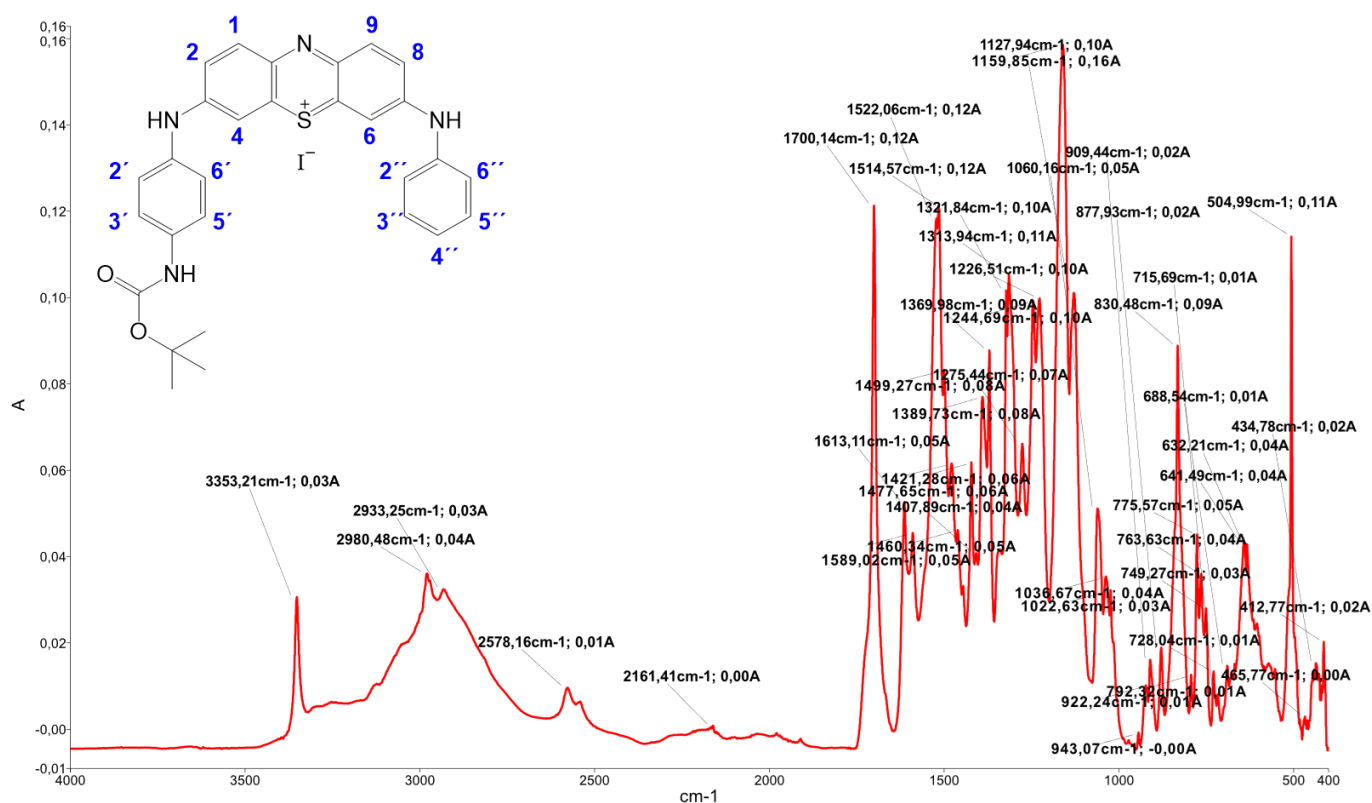

Figure S48. FT-IR spectrum of the compound 21.

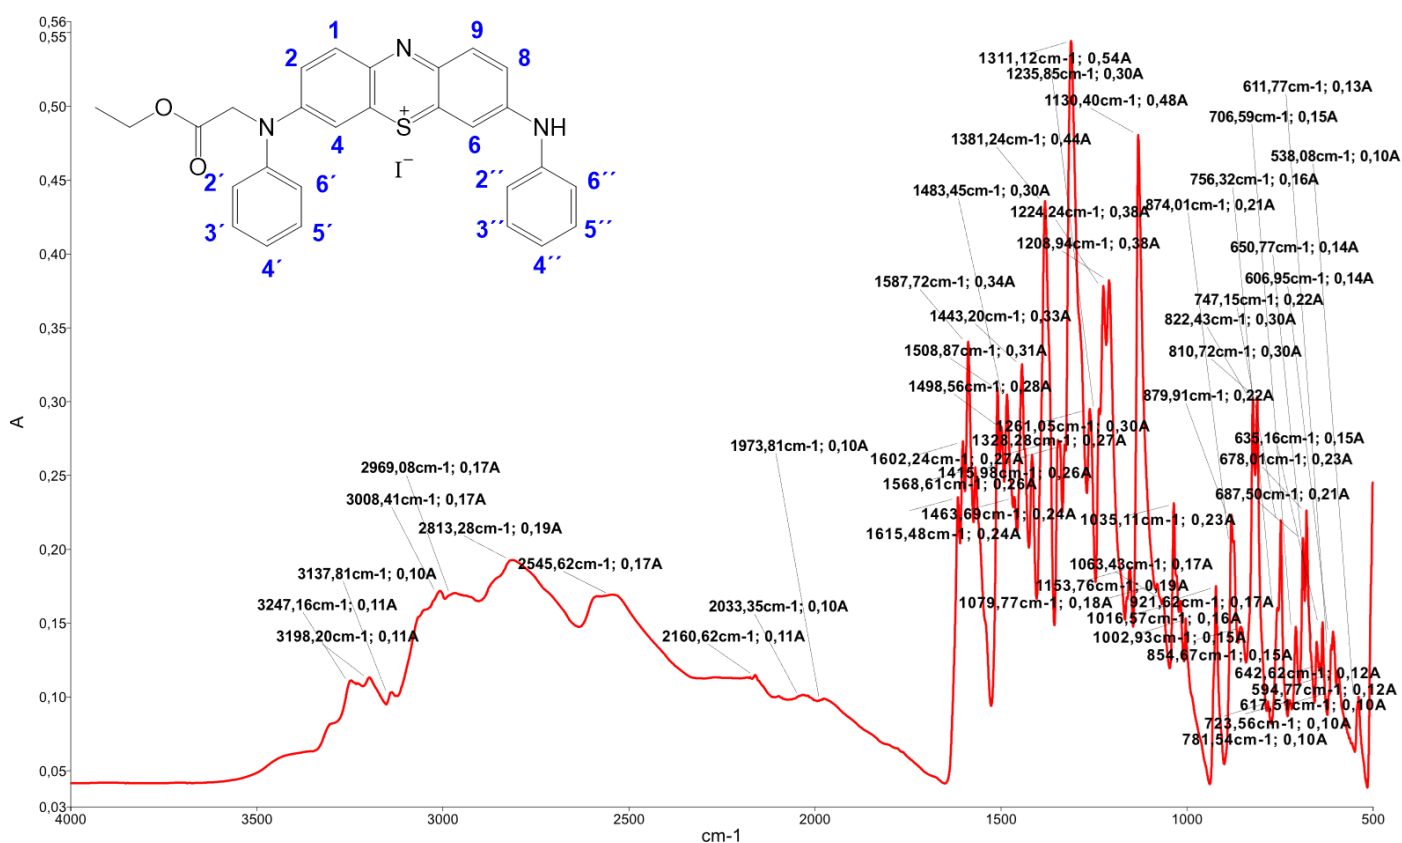

Figure S49. FT-IR spectrum of the compound 22.

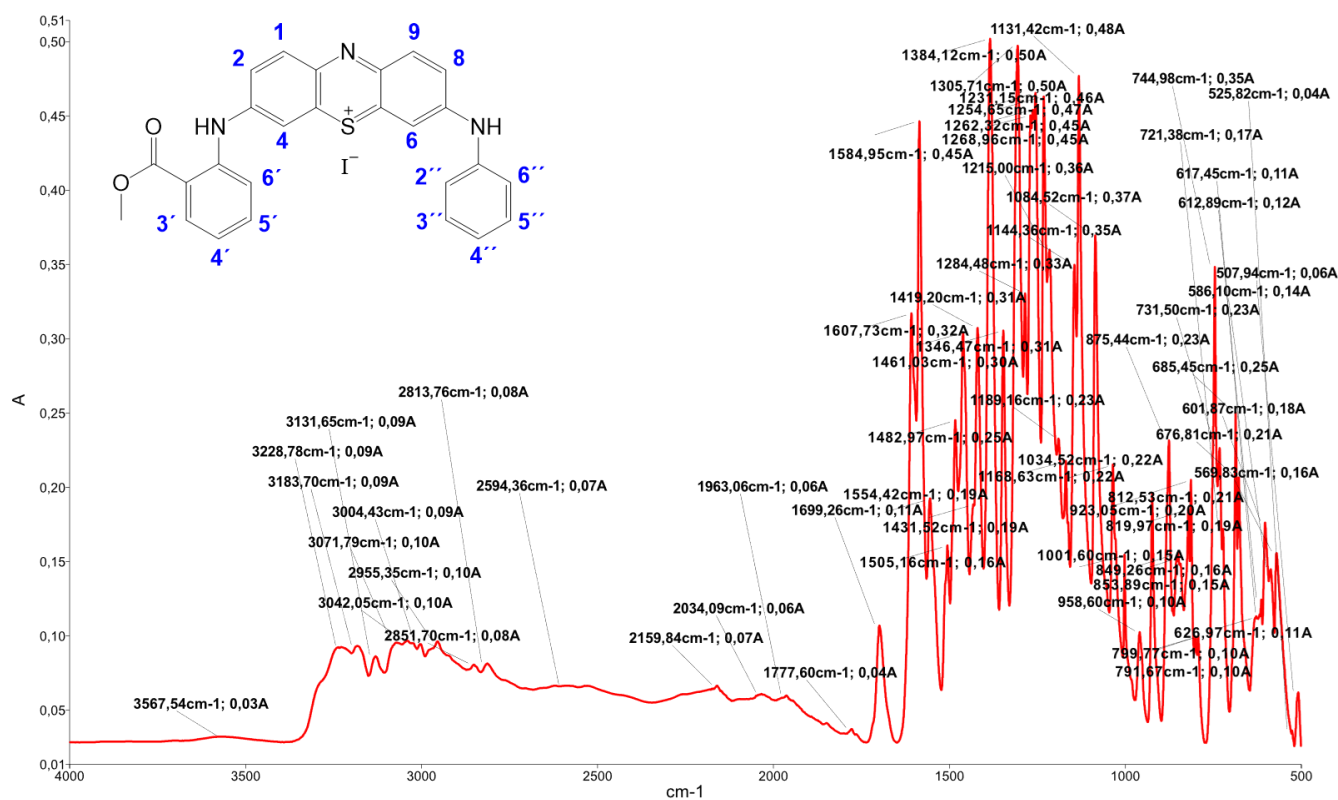

Figure S50. FT-IR spectrum of the compound 23.

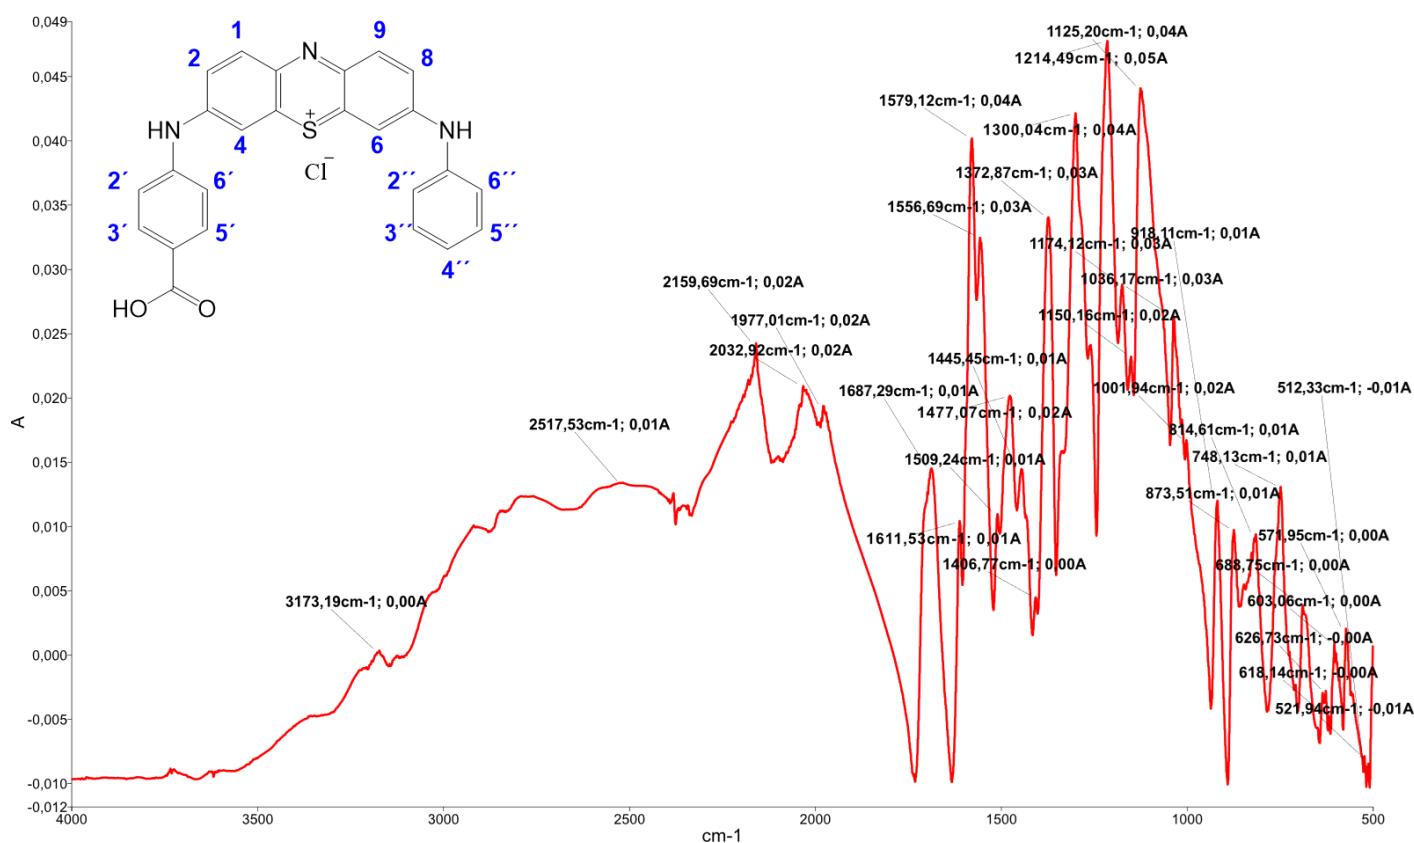

Figure S51. FT-IR spectrum of the compound 24.

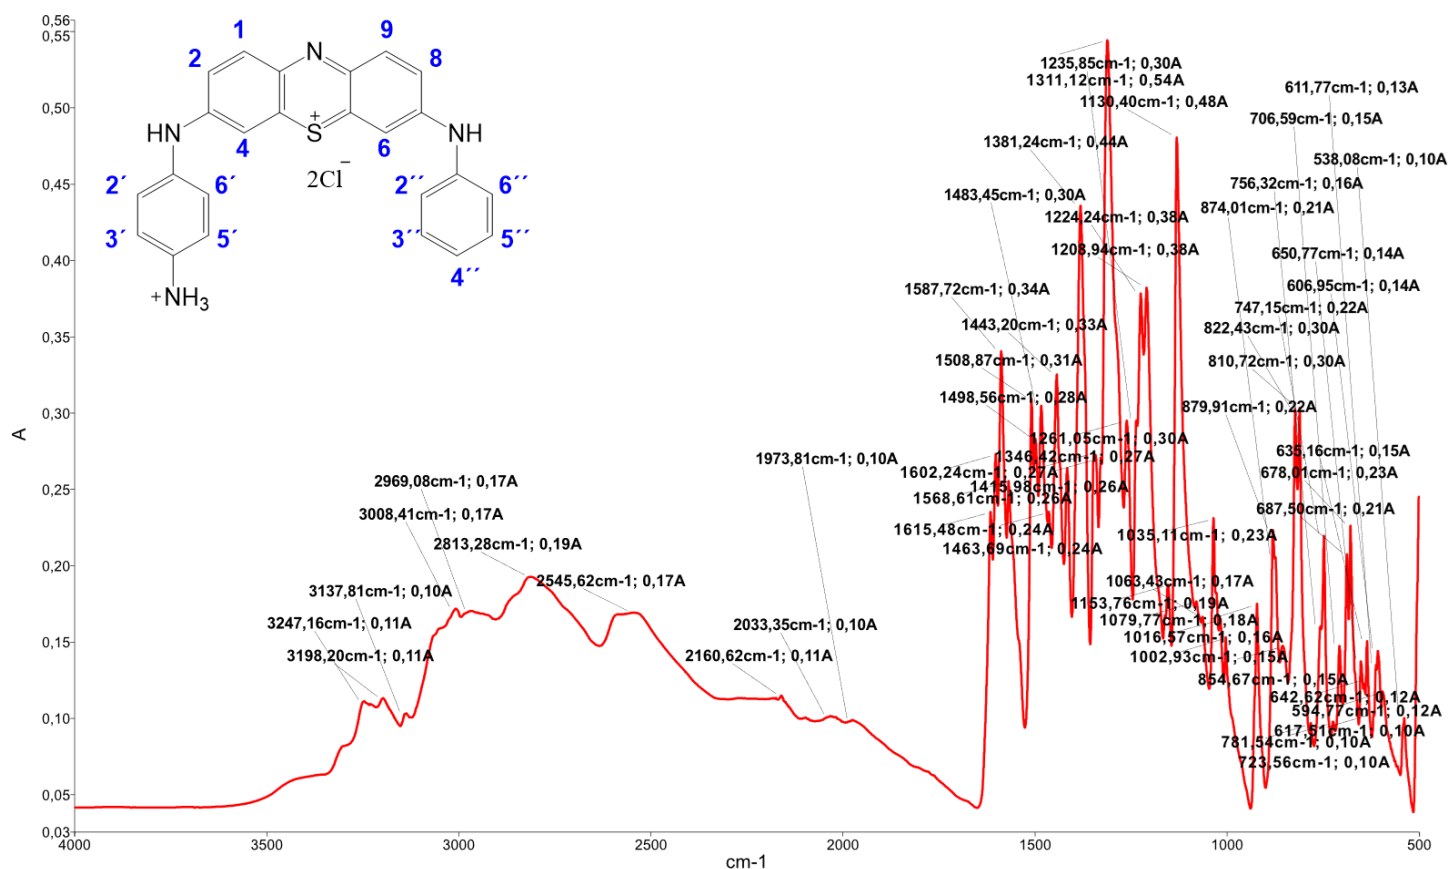

Figure S52. FT-IR spectrum of the compound 25.

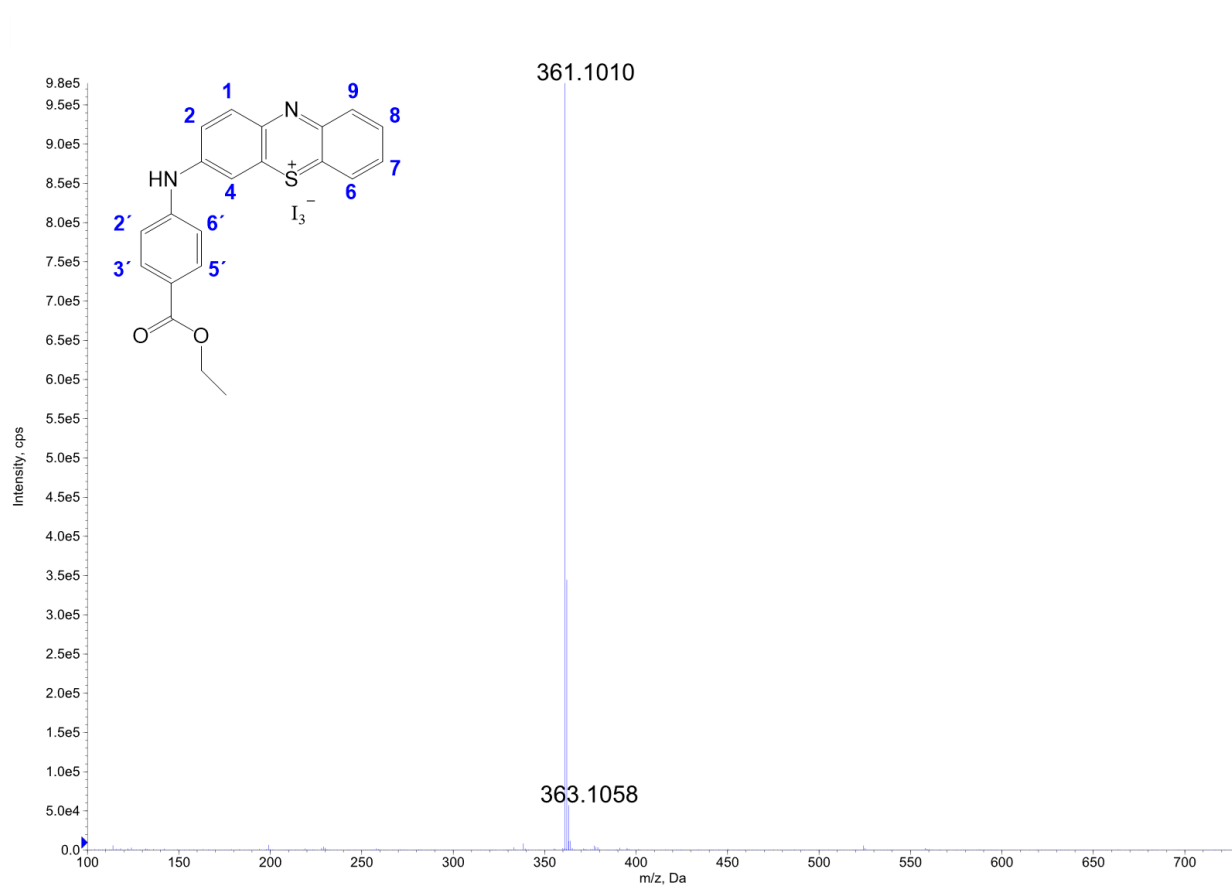Figure S53. HRMS spectrum of the compound **10**.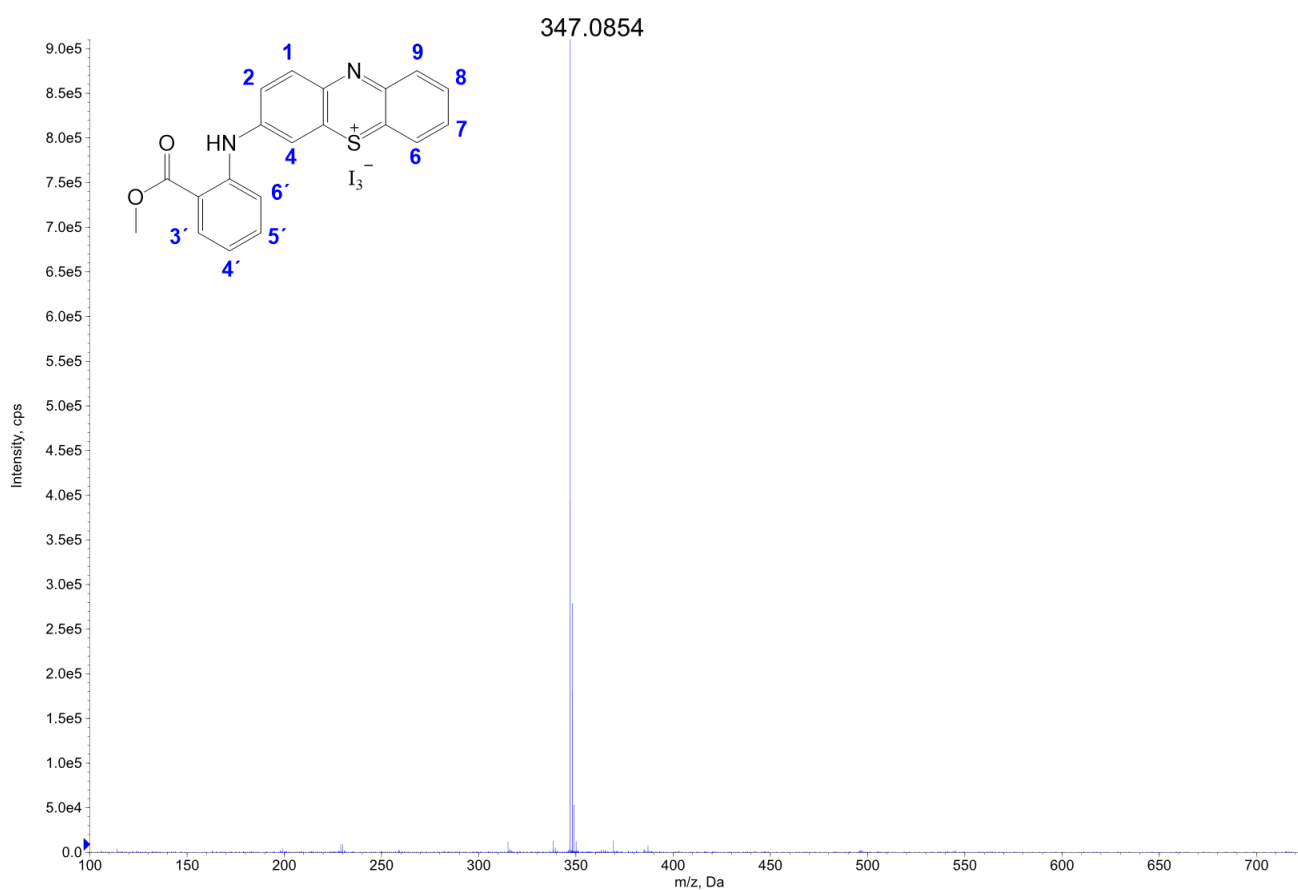Figure S54. HRMS spectrum of the compound **11**.

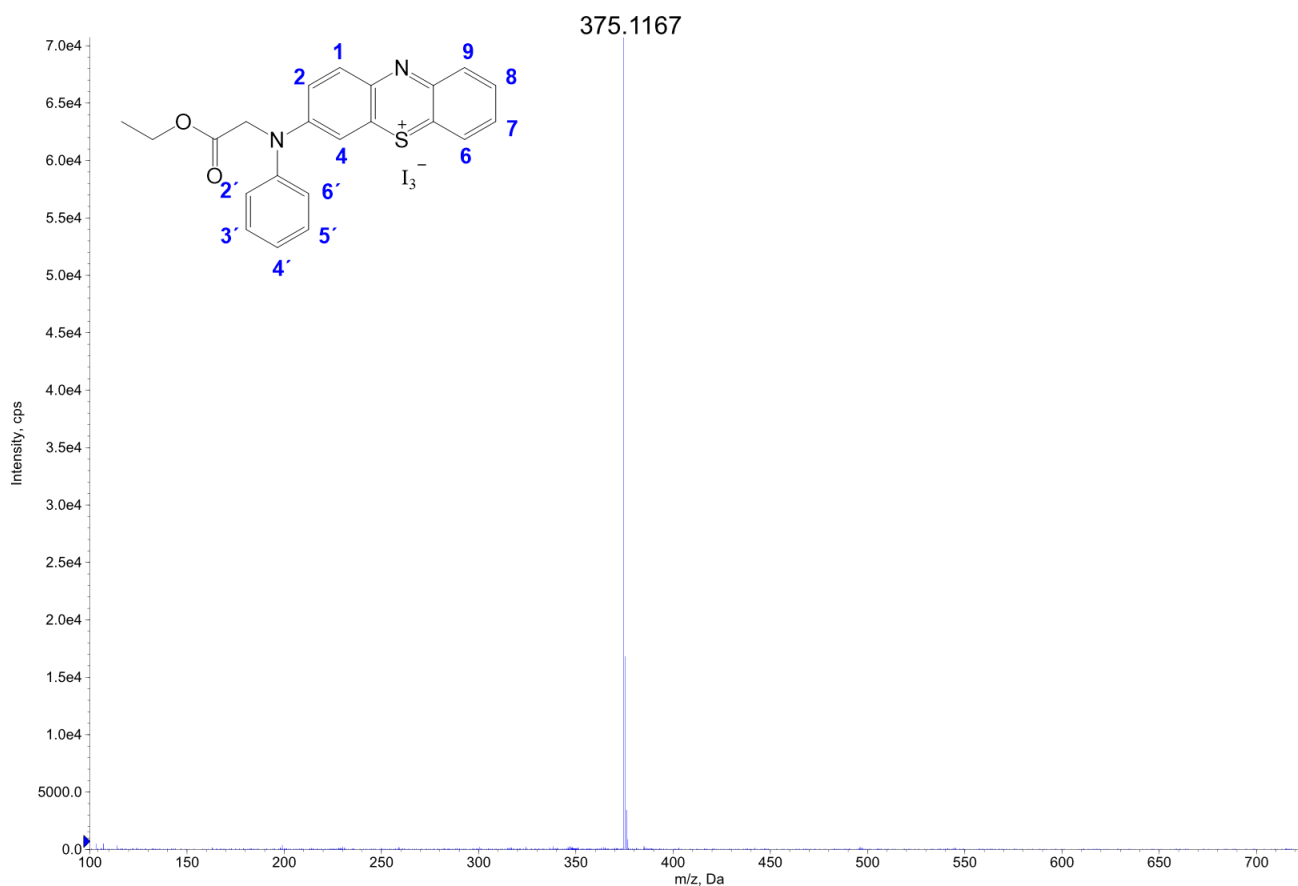Figure S55. HRMS spectrum of the compound **12**.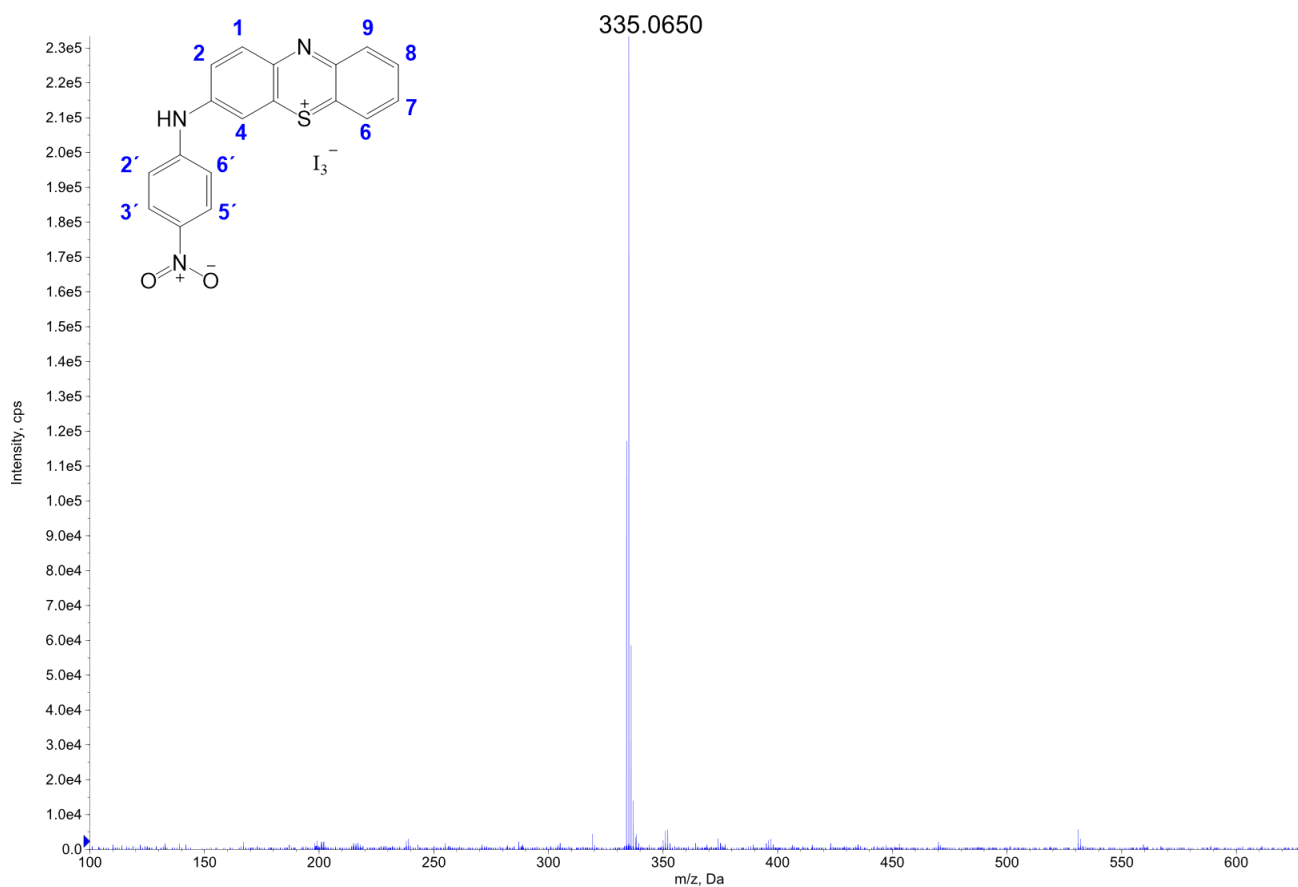Figure S56. HRMS spectrum of the compound **13**.

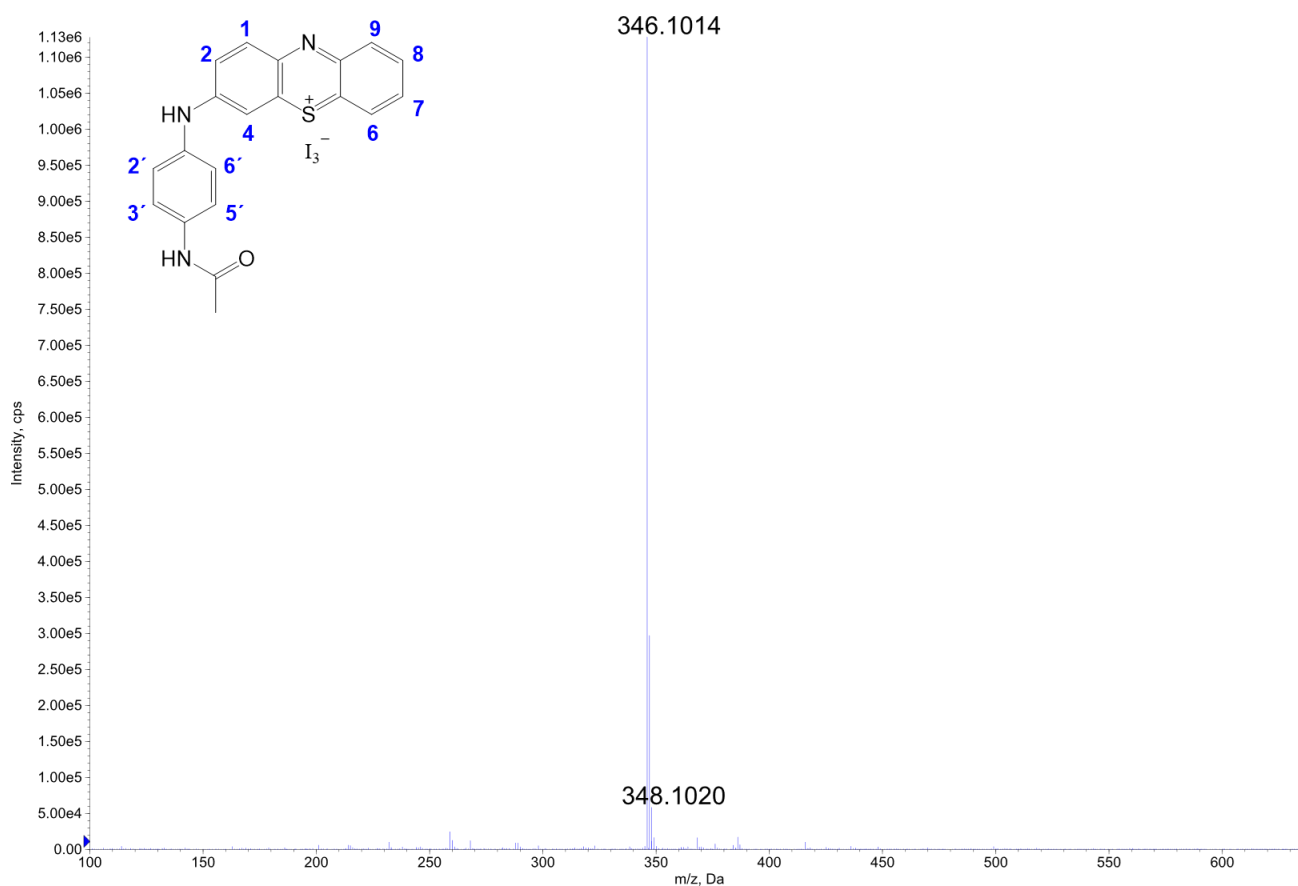Figure S57. HRMS spectrum of the compound **14**.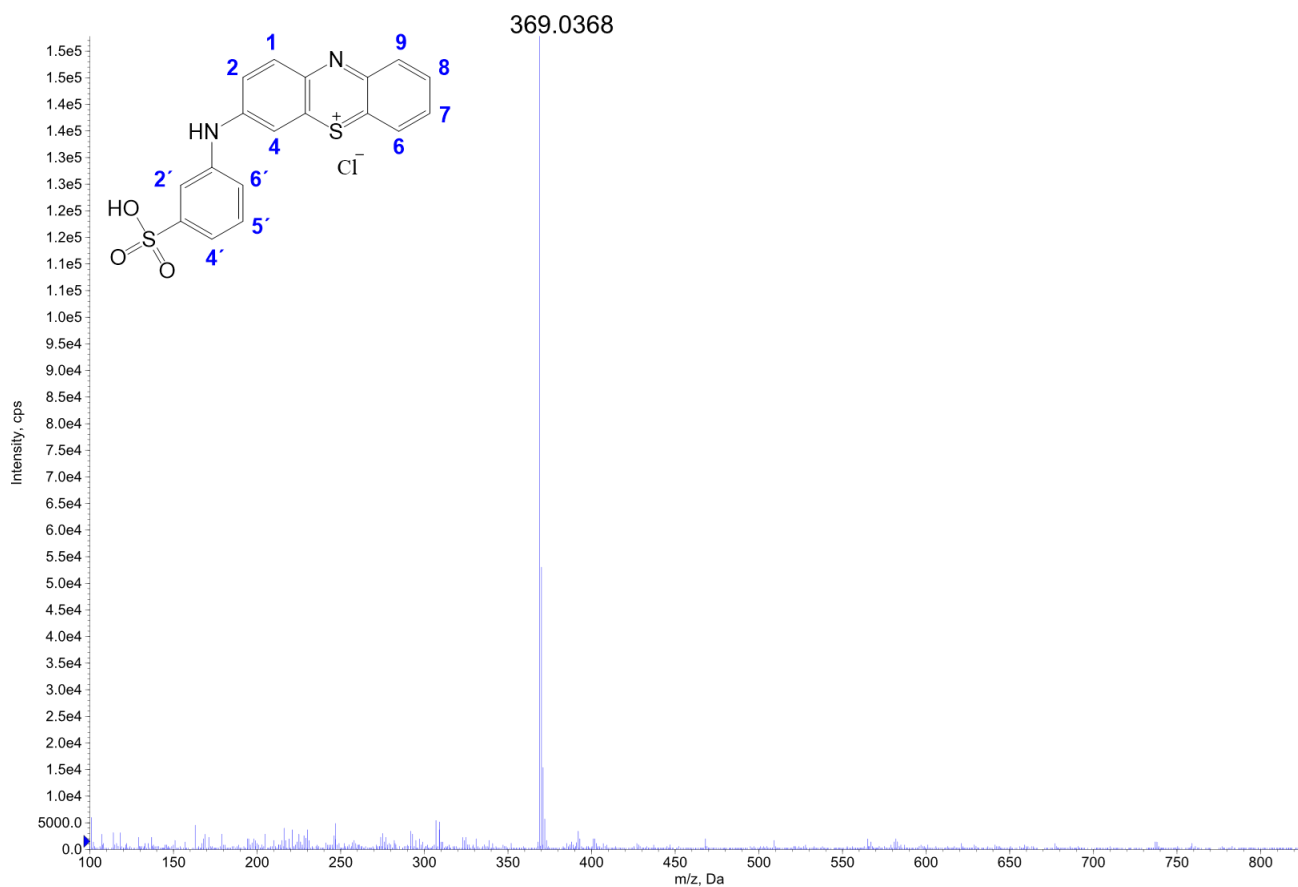Figure S58. HRMS spectrum of the compound **15**.

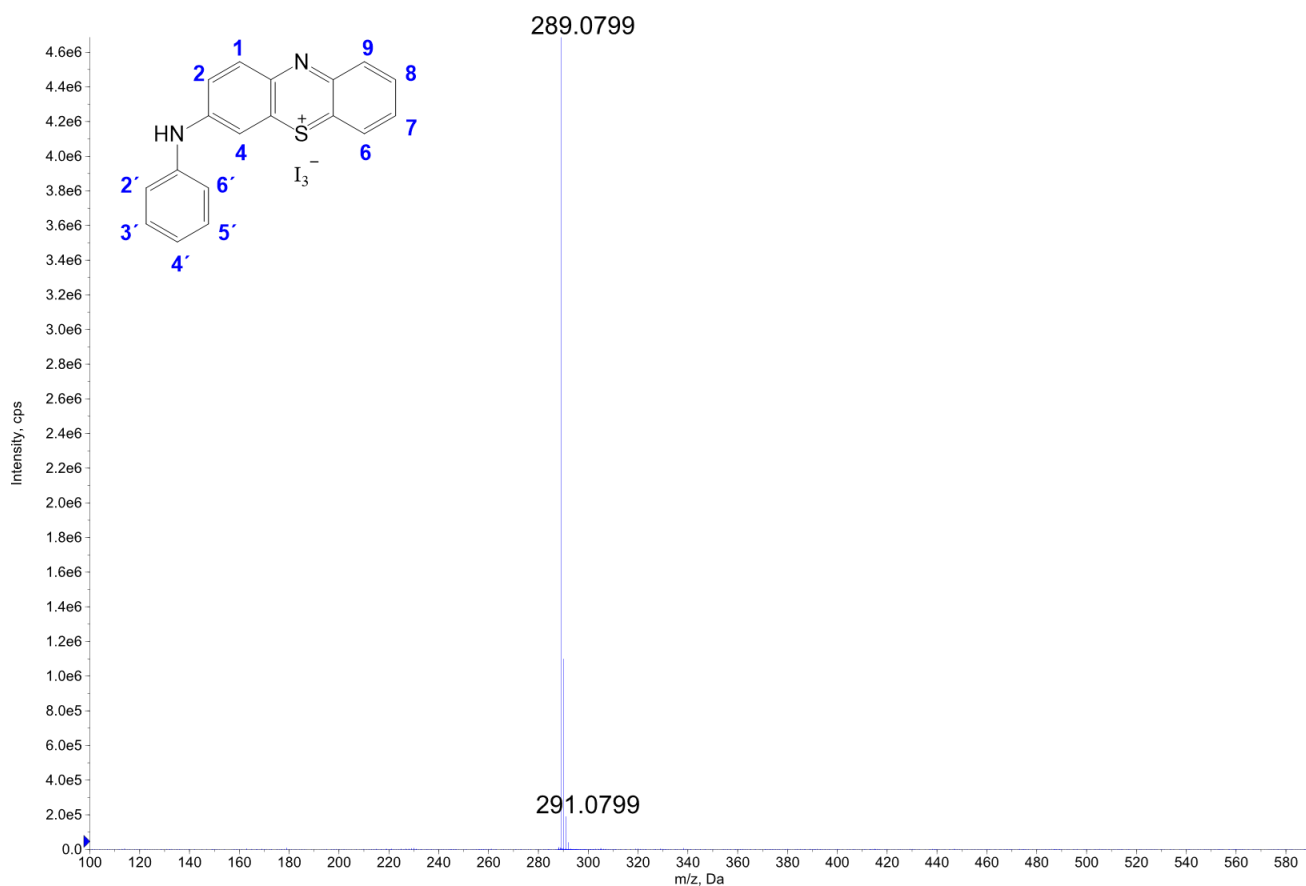

Figure S59. HRMS spectrum of the compound 16.

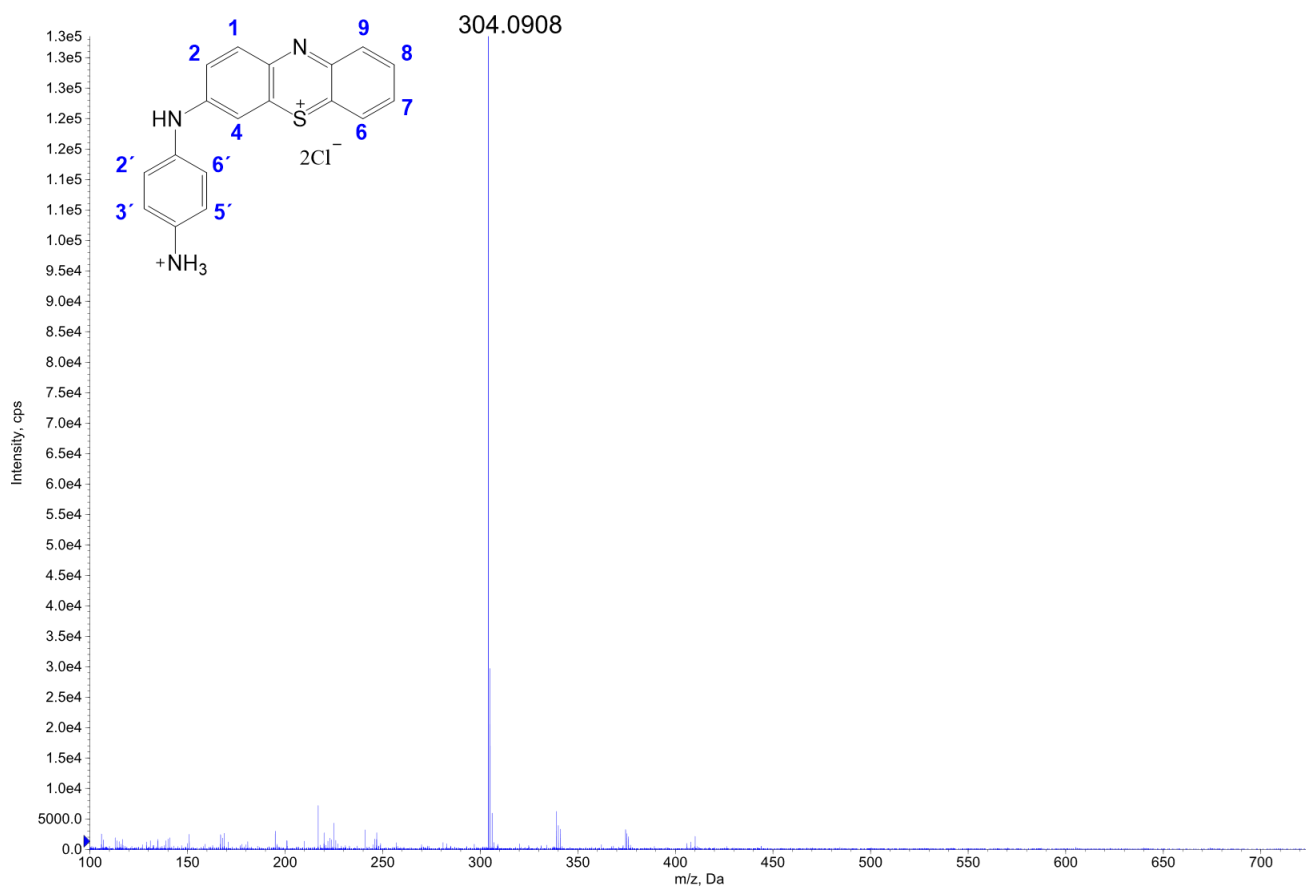

Figure S60. HRMS spectrum of the compound 17.



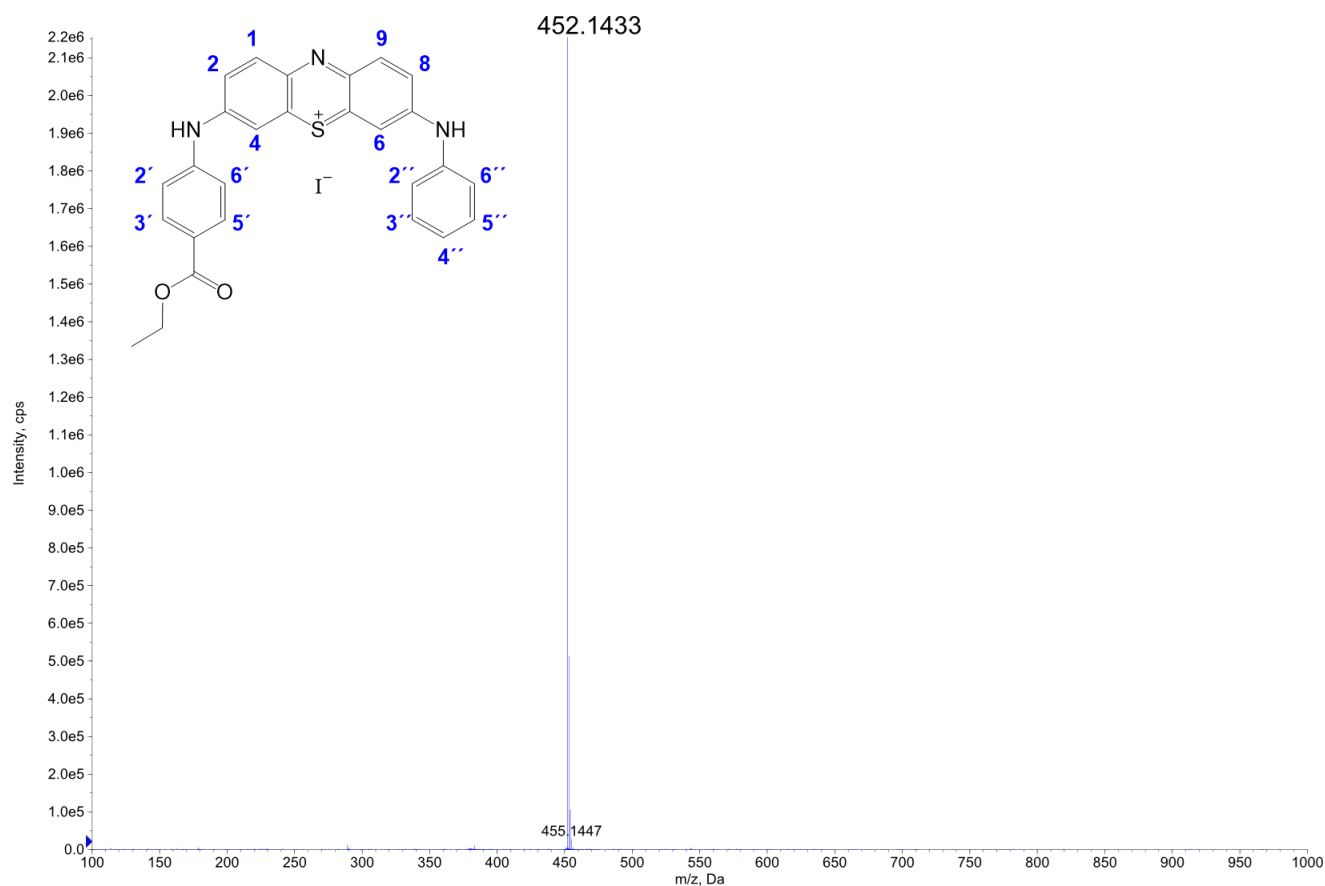Figure S61. HRMS spectrum of the compound **18**.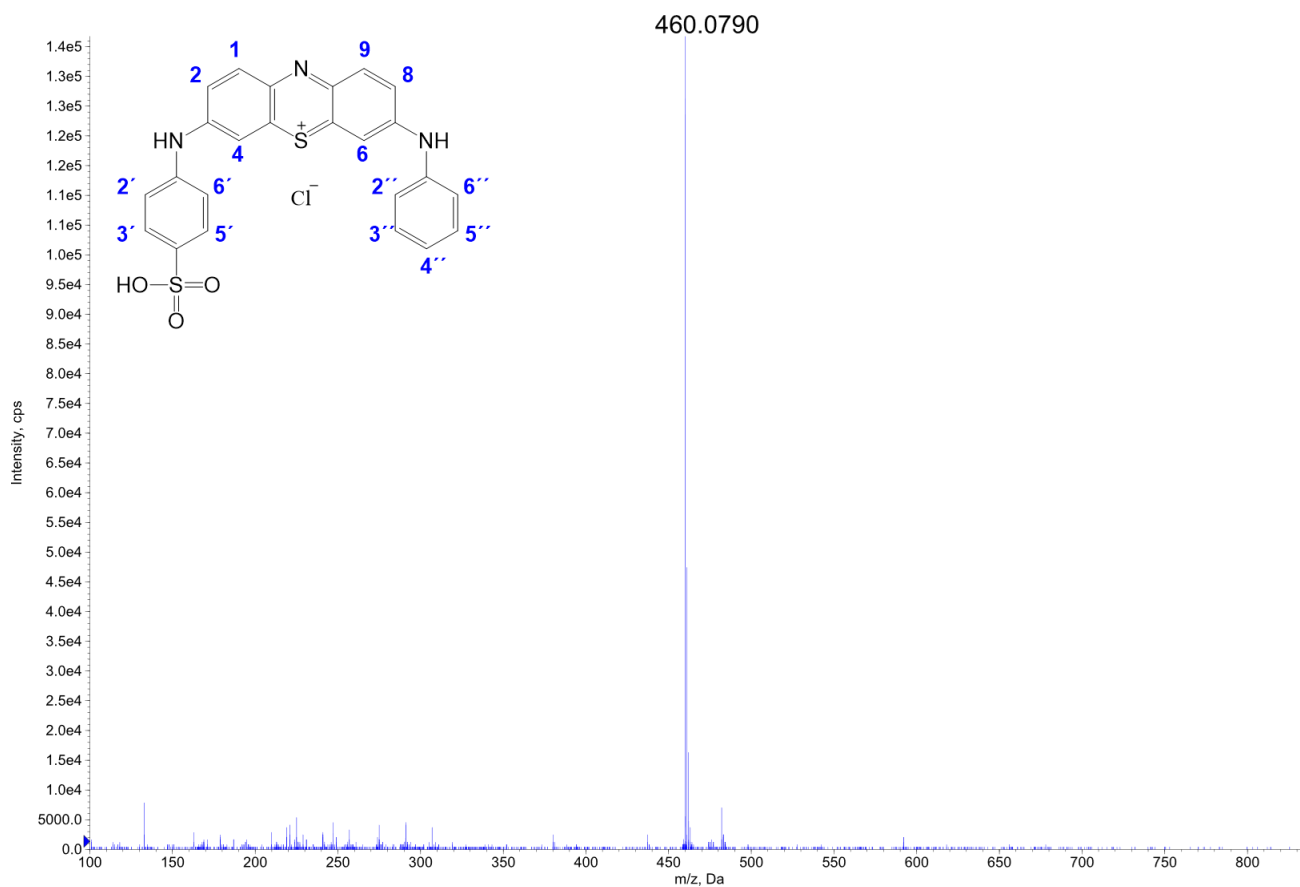Figure S62. HRMS spectrum of the compound **19**.

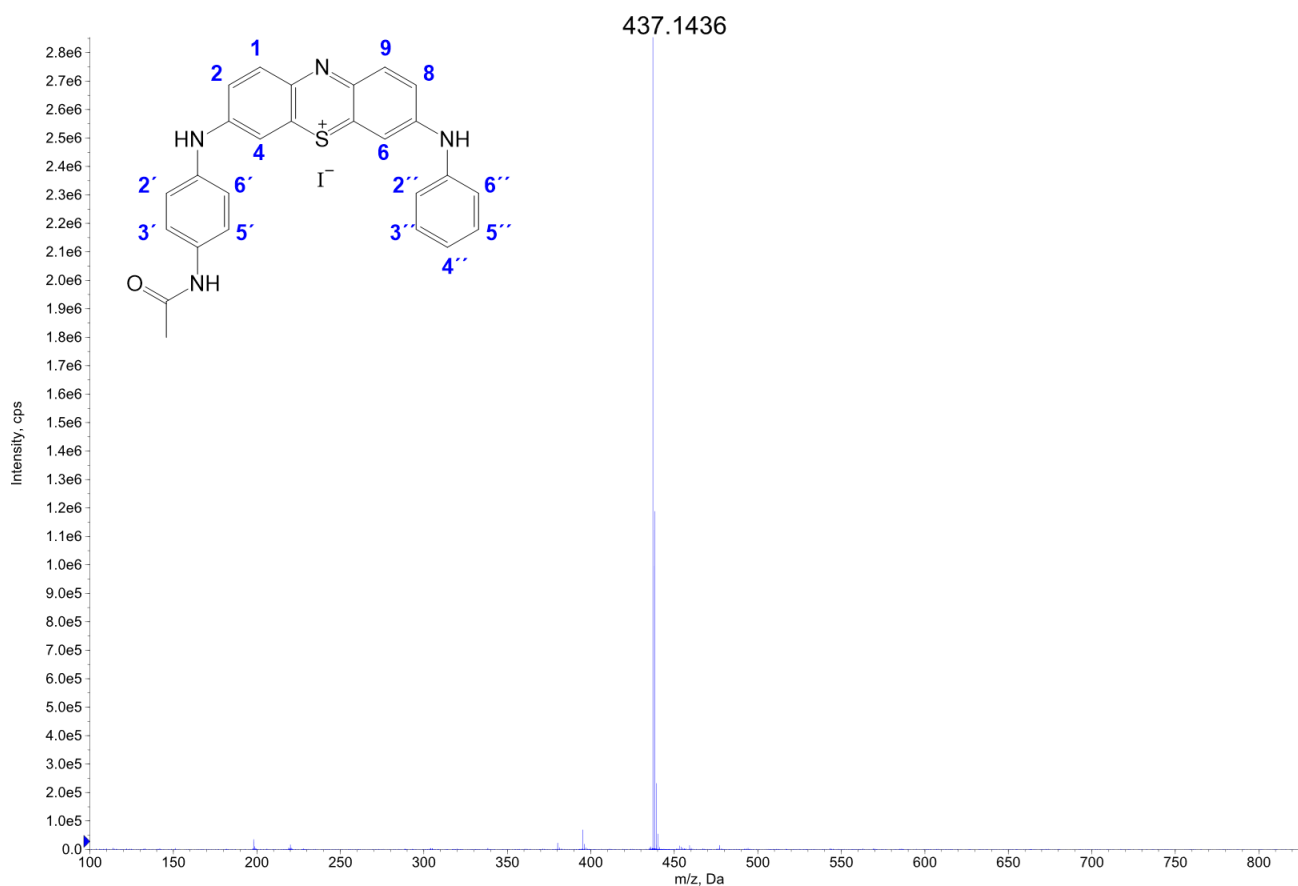

Figure S63. HRMS spectrum of the compound 20.

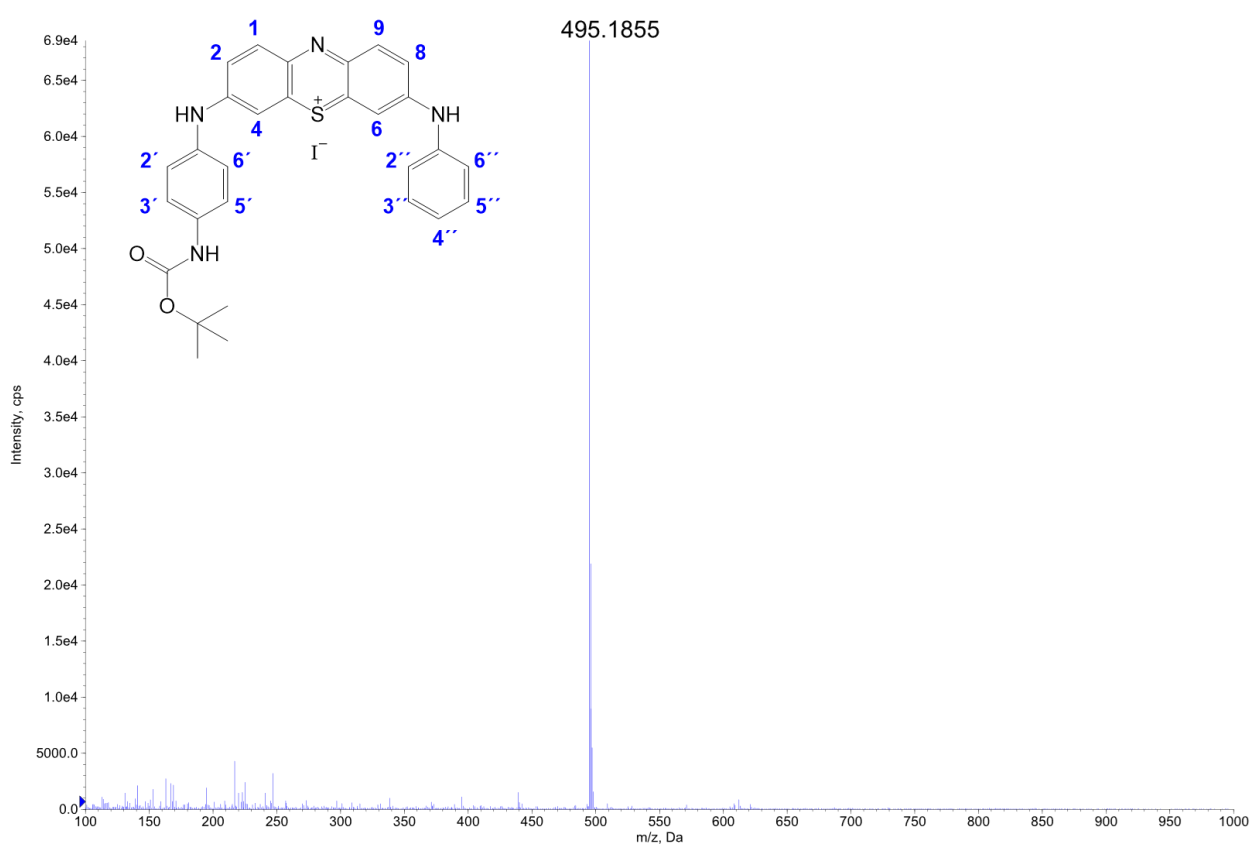

Figure S64. HRMS spectrum of the compound 21.

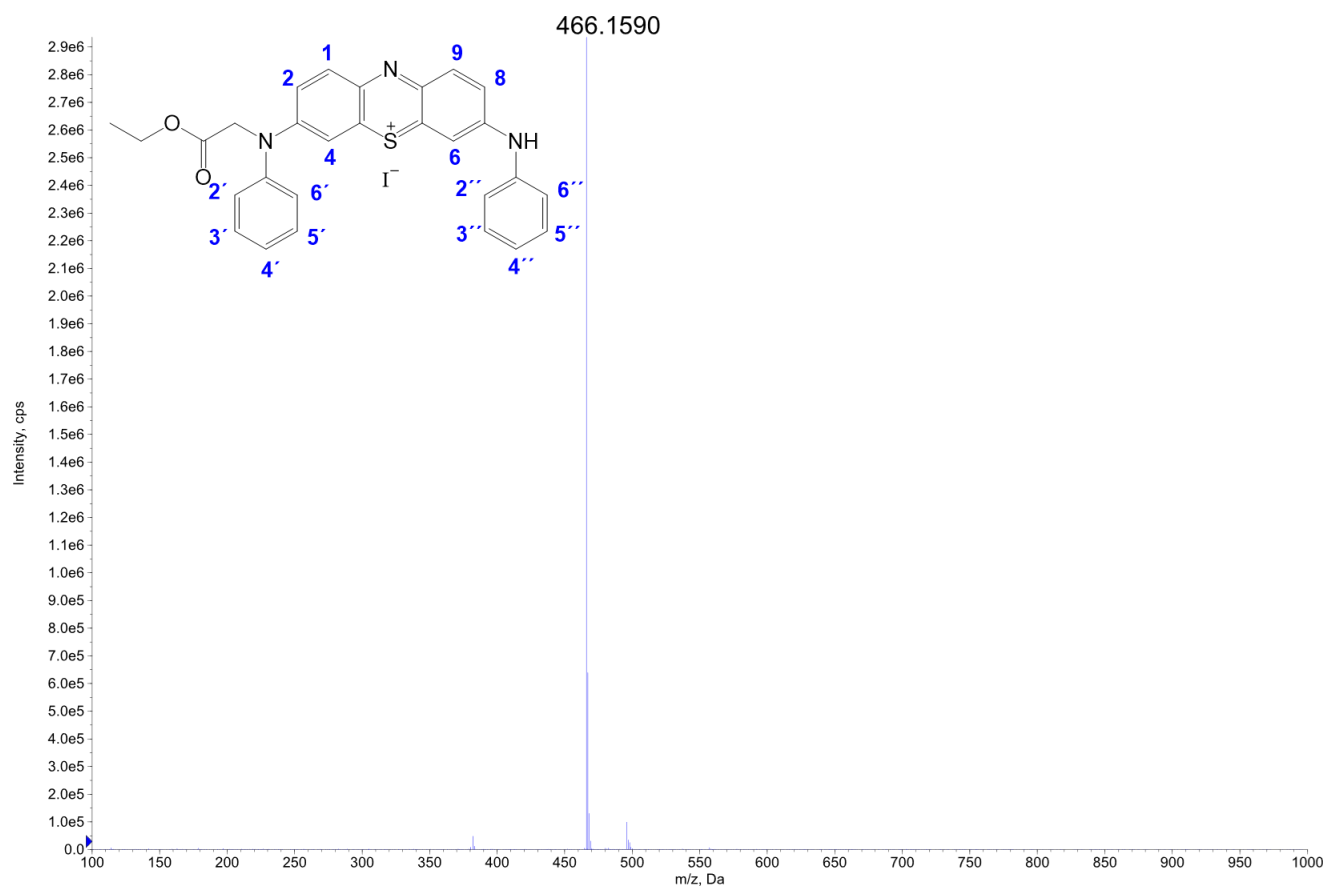

Figure S65. HRMS spectrum of the compound 22.

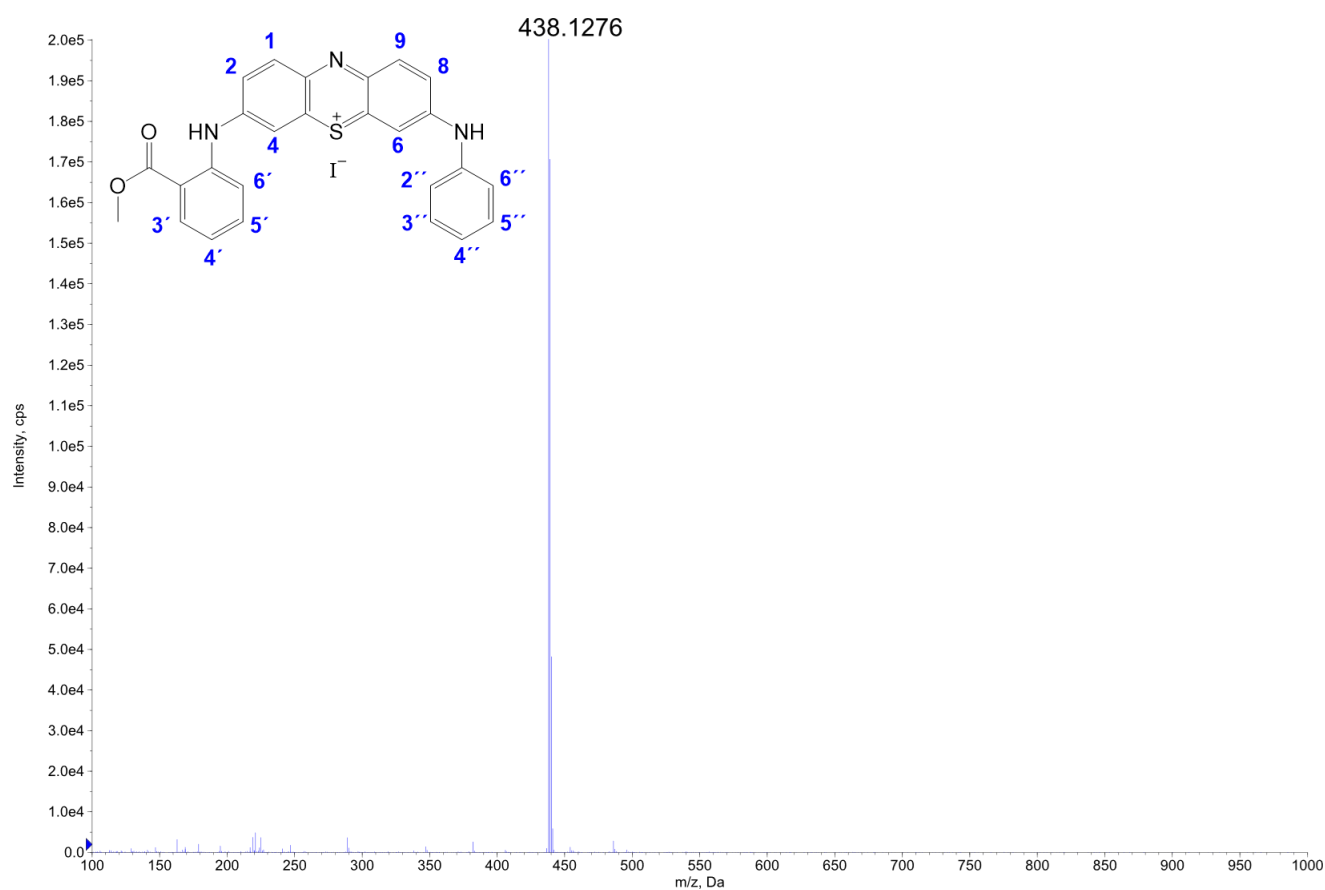

Figure S66. HRMS spectrum of the compound 23.

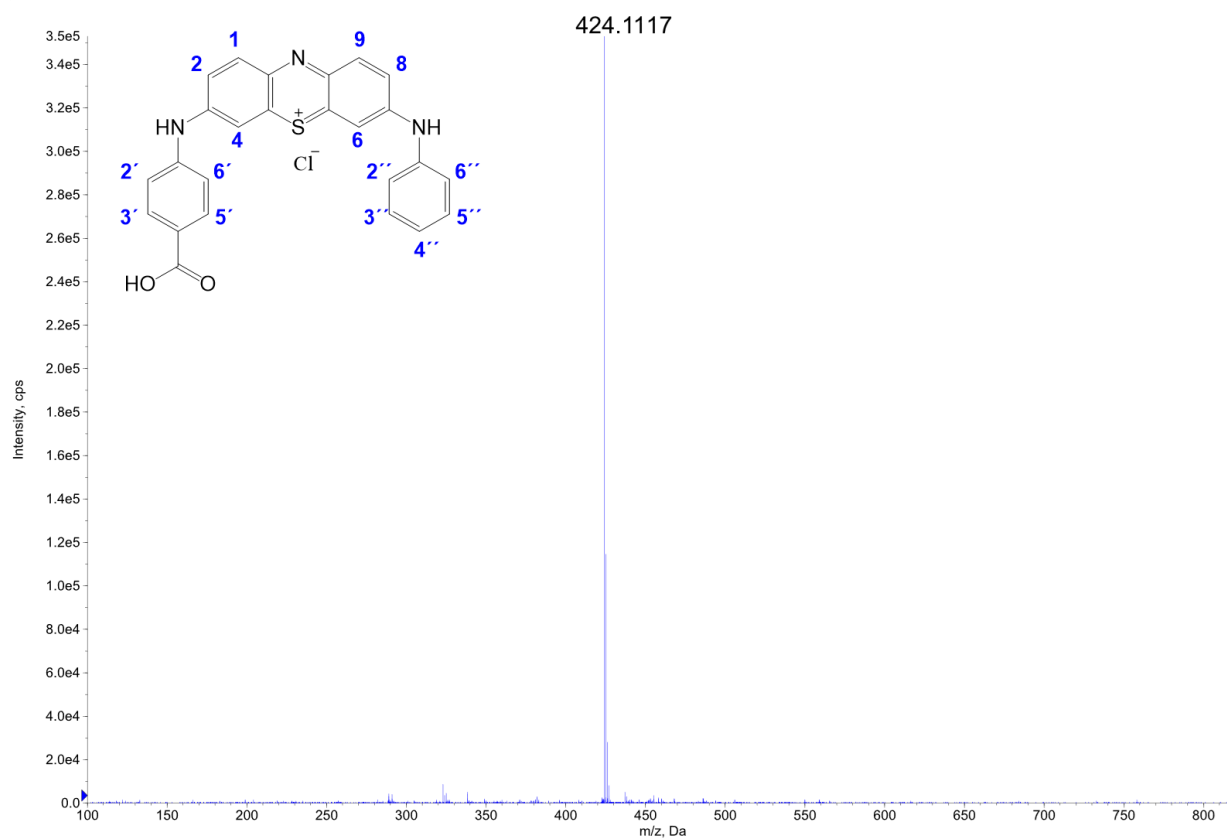Figure S67. HRMS spectrum of the compound **24**.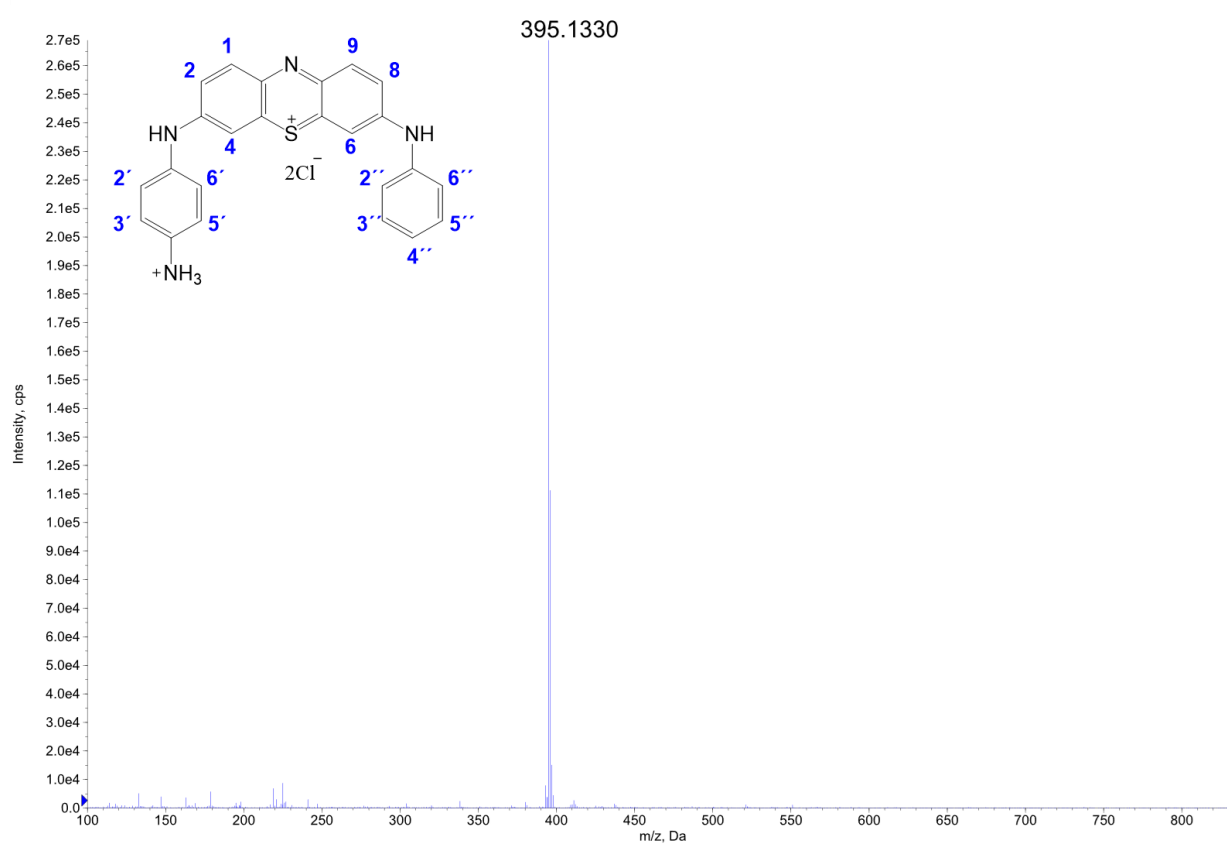Figure S68. HRMS spectrum of the compound **25**.

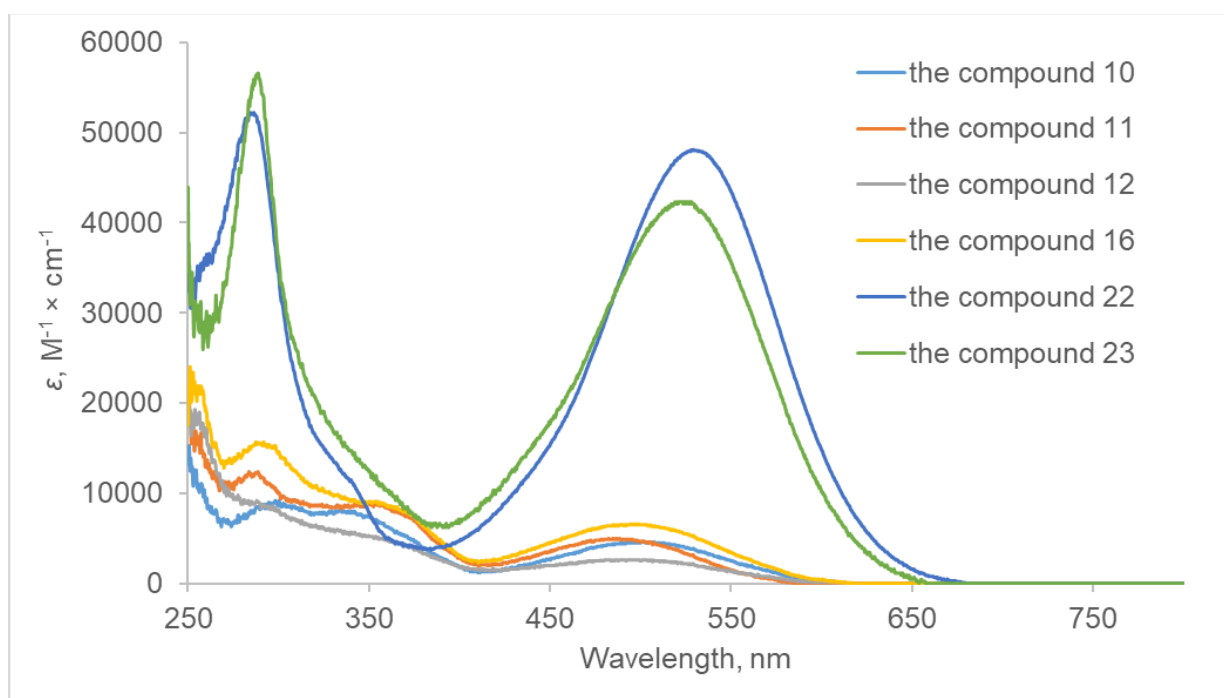

Figure S69. UV-Vis spectra of the compounds **10**, **11**, **12**, **16**, **22**, and **23** (THF,  $1 \times 10^{-5}$  M).

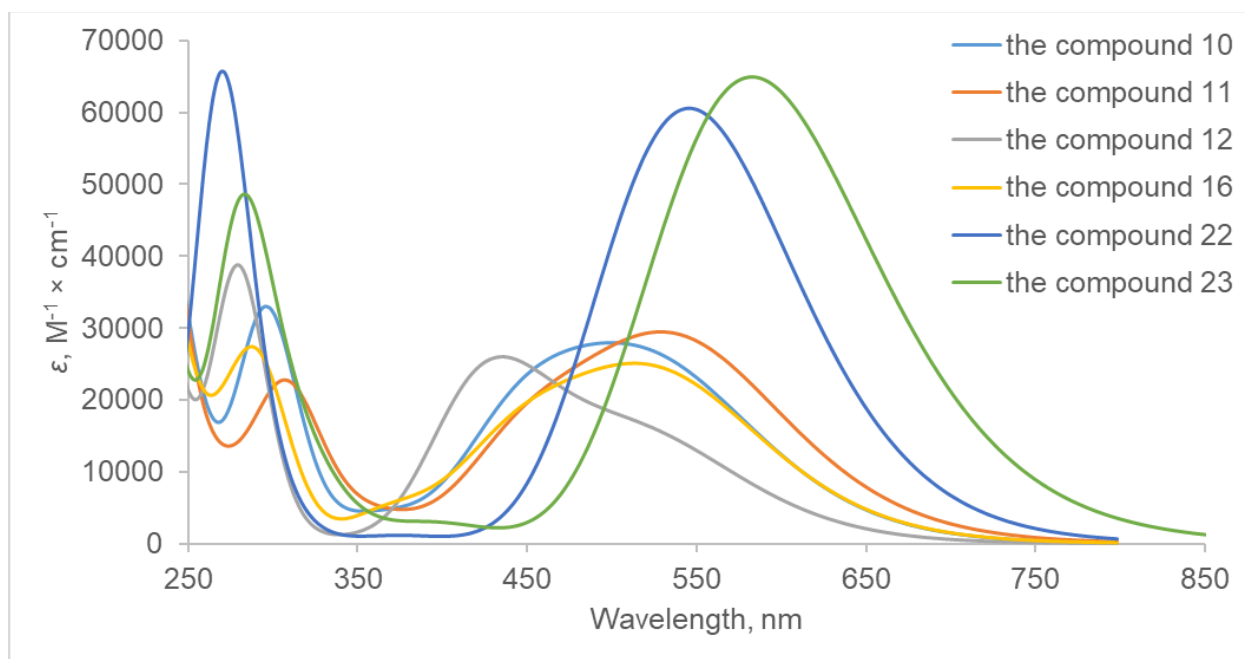

Figure S70. Calculated (TD-DFT M06-HF/6-311++G(d,p)/IEFPCM) UV-Vis absorption spectra of the compounds **10**, **11**, **12**, **16**, **22**, and **23** in THF.

Table S1. Absolute energies, minimum frequencies and calculated atomic coordinates for cations **1**, **10-16** (DFT B3LYP/6-311++G(d,p)).

**1:** E = -914.9304313 a.u.,  $\omega_1=78.6\text{ cm}^{-1}$

| Center<br>Number | Atomic<br>Number | Atomic<br>Type | Coordinates (Angstroms) |           |           |
|------------------|------------------|----------------|-------------------------|-----------|-----------|
|                  |                  |                | X                       | Y         | Z         |
| 1                | 6                | 0              | -3.740514               | -0.362518 | 0.000318  |
| 2                | 6                | 0              | -3.596718               | 1.046692  | 0.000097  |
| 3                | 6                | 0              | -2.349490               | 1.609784  | -0.000143 |
| 4                | 6                | 0              | -1.179339               | 0.788075  | -0.000150 |
| 5                | 6                | 0              | -1.354194               | -0.643894 | 0.000027  |
| 6                | 6                | 0              | -2.642132               | -1.200122 | 0.000288  |
| 7                | 16               | 0              | 0.000050                | -1.707209 | -0.000074 |
| 8                | 6                | 0              | 1.353892                | -0.644081 | -0.000410 |
| 9                | 6                | 0              | 1.179398                | 0.788017  | -0.000666 |
| 10               | 7                | 0              | 0.000089                | 1.413530  | -0.000351 |
| 11               | 6                | 0              | 2.642269                | -1.200256 | -0.000117 |
| 12               | 6                | 0              | 3.740371                | -0.362479 | -0.000073 |
| 13               | 6                | 0              | 3.596781                | 1.046778  | 0.000532  |
| 14               | 6                | 0              | 2.349538                | 1.609853  | 0.000337  |
| 15               | 1                | 0              | -4.733817               | -0.796000 | 0.000525  |
| 16               | 1                | 0              | -4.480069               | 1.672955  | 0.000141  |
| 17               | 1                | 0              | -2.197905               | 2.681793  | -0.000278 |
| 18               | 1                | 0              | -2.772821               | -2.275977 | 0.000480  |
| 19               | 1                | 0              | 2.772738                | -2.276095 | 0.000147  |
| 20               | 1                | 0              | 4.480114                | 1.673012  | 0.000848  |
| 21               | 1                | 0              | 2.197401                | 2.681766  | 0.000551  |
| 22               | 1                | 0              | 4.733766                | -0.795919 | 0.000984  |

**10A:** E = -1468.710065 a.u.,  $\omega_1=21.5\text{ cm}^{-1}$

| Center<br>Number | Atomic<br>Number | Atomic<br>Type | Coordinates (Angstroms) |           |           |
|------------------|------------------|----------------|-------------------------|-----------|-----------|
|                  |                  |                | X                       | Y         | Z         |
| 1                | 6                | 0              | -7.891726               | 0.760002  | -0.223656 |
| 2                | 6                | 0              | -7.478576               | 1.927103  | 0.446906  |
| 3                | 6                | 0              | -6.147471               | 2.117606  | 0.735951  |
| 4                | 6                | 0              | -5.178646               | 1.147428  | 0.367492  |
| 5                | 6                | 0              | -5.620455               | -0.027781 | -0.308948 |
| 6                | 6                | 0              | -6.976795               | -0.209882 | -0.600624 |
| 7                | 16               | 0              | -4.503813               | -1.273277 | -0.796726 |
| 8                | 6                | 0              | -2.968104               | -0.669988 | -0.258728 |

|    |   |   |           |            |           |
|----|---|---|-----------|------------|-----------|
| 9  | 6 | 0 | -2.882318 | 0.618349   | 0.410923  |
| 10 | 7 | 0 | -3.888607 | 1.418566   | 0.683778  |
| 11 | 6 | 0 | -1.840369 | -1.432916  | -0.492129 |
| 12 | 6 | 0 | -0.572189 | -0.967164  | -0.086101 |
| 13 | 6 | 0 | -0.465198 | 0.316721   | 0.559187  |
| 14 | 6 | 0 | -1.566804 | 1.064832   | 0.798608  |
| 15 | 7 | 0 | 0.565353  | -1.662566  | -0.290269 |
| 16 | 6 | 0 | 0.723549  | -2.983375  | -0.805611 |
| 17 | 6 | 0 | 1.687173  | -3.199718  | -1.794830 |
| 18 | 6 | 0 | 1.894485  | -4.483208  | -2.281030 |
| 19 | 6 | 0 | 1.145912  | -5.555869  | -1.787362 |
| 20 | 6 | 0 | 0.193407  | -5.333161  | -0.788335 |
| 21 | 6 | 0 | -0.015874 | -4.052099  | -0.290388 |
| 22 | 6 | 0 | 1.417685  | -6.918598  | -2.353397 |
| 23 | 8 | 0 | 0.641467  | -7.861171  | -1.801995 |
| 24 | 8 | 0 | 2.245090  | -7.125619  | -3.208759 |
| 25 | 6 | 0 | 0.835271  | -9.226378  | -2.279930 |
| 26 | 6 | 0 | -0.139866 | -10.114909 | -1.539270 |
| 27 | 1 | 0 | -8.941027 | 0.613511   | -0.450880 |
| 28 | 1 | 0 | -8.211038 | 2.672028   | 0.731504  |
| 29 | 1 | 0 | -5.791773 | 3.002973   | 1.247879  |
| 30 | 1 | 0 | -7.309263 | -1.103296  | -1.116537 |
| 31 | 1 | 0 | -1.920709 | -2.379228  | -1.010042 |
| 32 | 1 | 0 | 0.514515  | 0.670094   | 0.861865  |
| 33 | 1 | 0 | -1.506008 | 2.027580   | 1.290315  |
| 34 | 1 | 0 | 1.427431  | -1.171484  | -0.088726 |
| 35 | 1 | 0 | 2.259956  | -2.367075  | -2.187758 |
| 36 | 1 | 0 | 2.632457  | -4.672610  | -3.050495 |
| 37 | 1 | 0 | -0.366608 | -6.168193  | -0.389087 |
| 38 | 1 | 0 | -0.720497 | -3.891681  | 0.516511  |
| 39 | 1 | 0 | 0.669225  | -9.234745  | -3.358698 |
| 40 | 1 | 0 | 1.874230  | -9.505355  | -2.095091 |
| 41 | 1 | 0 | -0.017168 | -11.146880 | -1.877156 |
| 42 | 1 | 0 | 0.039197  | -10.086695 | -0.462281 |
| 43 | 1 | 0 | -1.172262 | -9.814832  | -1.731707 |

10B: E = -1468.7093167 a.u.,  $\omega_1=20.1 \text{ cm}^{-1}$

| Center | Atomic | Atomic | Coordinates (Angstroms) |           |           |
|--------|--------|--------|-------------------------|-----------|-----------|
| Number | Number | Type   | X                       | Y         | Z         |
| -----  |        |        |                         |           |           |
| 1      | 6      | 0      | -7.612672               | -2.507051 | -0.332884 |
| 2      | 6      | 0      | -7.766388               | -1.249816 | 0.281732  |
| 3      | 6      | 0      | -6.658844               | -0.485001 | 0.565067  |
| 4      | 6      | 0      | -5.355428               | -0.947990 | 0.245042  |

|    |    |   |           |           |           |
|----|----|---|-----------|-----------|-----------|
| 5  | 6  | 0 | -5.223956 | -2.224735 | -0.376823 |
| 6  | 6  | 0 | -6.357459 | -2.993943 | -0.661215 |
| 7  | 16 | 0 | -3.664999 | -2.876102 | -0.805023 |
| 8  | 6  | 0 | -2.560625 | -1.638031 | -0.292311 |
| 9  | 6  | 0 | -3.060126 | -0.418927 | 0.324824  |
| 10 | 7  | 0 | -4.320759 | -0.129762 | 0.558374  |
| 11 | 6  | 0 | -1.208444 | -1.826644 | -0.483815 |
| 12 | 6  | 0 | -0.276533 | -0.838211 | -0.090539 |
| 13 | 6  | 0 | -0.750842 | 0.366144  | 0.537876  |
| 14 | 6  | 0 | -2.078575 | 0.554886  | 0.732780  |
| 15 | 7  | 0 | 1.039035  | -1.062689 | -0.285225 |
| 16 | 6  | 0 | 2.132373  | -0.164296 | -0.094597 |
| 17 | 6  | 0 | 3.252747  | -0.619064 | 0.606416  |
| 18 | 6  | 0 | 4.346240  | 0.220361  | 0.768447  |
| 19 | 6  | 0 | 4.330327  | 1.513386  | 0.236457  |
| 20 | 6  | 0 | 3.210874  | 1.955839  | -0.474517 |
| 21 | 6  | 0 | 2.114752  | 1.118312  | -0.649620 |
| 22 | 6  | 0 | 5.542030  | 2.372377  | 0.449911  |
| 23 | 8  | 0 | 5.408891  | 3.584506  | -0.104377 |
| 24 | 8  | 0 | 6.517921  | 1.998568  | 1.055920  |
| 25 | 6  | 0 | 6.538236  | 4.496625  | 0.045698  |
| 26 | 6  | 0 | 6.178173  | 5.792054  | -0.647809 |
| 27 | 1  | 0 | -8.486889 | -3.107621 | -0.554692 |
| 28 | 1  | 0 | -8.756856 | -0.889122 | 0.529242  |
| 29 | 1  | 0 | -6.737106 | 0.486602  | 1.036595  |
| 30 | 1  | 0 | -6.254660 | -3.963788 | -1.134232 |
| 31 | 1  | 0 | -0.846272 | -2.736446 | -0.951247 |
| 32 | 1  | 0 | -0.036249 | 1.102730  | 0.877165  |
| 33 | 1  | 0 | -2.456753 | 1.445022  | 1.220030  |
| 34 | 1  | 0 | 1.294443  | -1.993216 | -0.592352 |
| 35 | 1  | 0 | 3.260368  | -1.616015 | 1.032663  |
| 36 | 1  | 0 | 5.222340  | -0.108470 | 1.313286  |
| 37 | 1  | 0 | 3.209449  | 2.948238  | -0.905164 |
| 38 | 1  | 0 | 1.267960  | 1.447576  | -1.239685 |
| 39 | 1  | 0 | 6.723353  | 4.633530  | 1.112697  |
| 40 | 1  | 0 | 7.417801  | 4.021216  | -0.392231 |
| 41 | 1  | 0 | 7.008588  | 6.496028  | -0.552429 |
| 42 | 1  | 0 | 5.989410  | 5.631744  | -1.711501 |
| 43 | 1  | 0 | 5.293121  | 6.248197  | -0.198934 |

11A: E = - 1429.38786070 a.u.,  $\omega_1=20.6 \text{ cm}^{-1}$

| Center | Atomic | Atomic | Coordinates (Angstroms) |   |   |
|--------|--------|--------|-------------------------|---|---|
| Number | Number | Type   | X                       | Y | Z |
| -----  |        |        |                         |   |   |



|    |    |   |           |           |           |
|----|----|---|-----------|-----------|-----------|
| 1  | 6  | 0 | -6.980957 | 0.664434  | -0.126641 |
| 2  | 6  | 0 | -6.953582 | -0.545219 | 0.592467  |
| 3  | 6  | 0 | -5.751410 | -1.160268 | 0.856098  |
| 4  | 6  | 0 | -4.530455 | -0.587835 | 0.414062  |
| 5  | 6  | 0 | -4.582297 | 0.638435  | -0.310148 |
| 6  | 6  | 0 | -5.810445 | 1.253672  | -0.576821 |
| 7  | 16 | 0 | -3.133596 | 1.416161  | -0.889702 |
| 8  | 6  | 0 | -1.865842 | 0.357375  | -0.354251 |
| 9  | 6  | 0 | -2.189048 | -0.860962 | 0.372490  |
| 10 | 7  | 0 | -3.392605 | -1.266111 | 0.708850  |
| 11 | 6  | 0 | -0.558388 | 0.693118  | -0.647545 |
| 12 | 6  | 0 | 0.501246  | -0.151326 | -0.249306 |
| 13 | 6  | 0 | 0.193931  | -1.381831 | 0.438727  |
| 14 | 6  | 0 | -1.082869 | -1.710692 | 0.739741  |
| 15 | 7  | 0 | 1.806484  | 0.087290  | -0.489559 |
| 16 | 6  | 0 | 2.452829  | 1.210881  | -1.041887 |
| 17 | 6  | 0 | 3.637975  | 1.012981  | -1.796883 |
| 18 | 6  | 0 | 4.288948  | 2.127806  | -2.336271 |
| 19 | 6  | 0 | 3.808016  | 3.414465  | -2.125326 |
| 20 | 6  | 0 | 2.671531  | 3.603263  | -1.342078 |
| 21 | 6  | 0 | 2.000582  | 2.512854  | -0.800428 |
| 22 | 1  | 0 | -7.929254 | 1.145936  | -0.333895 |
| 23 | 1  | 0 | -7.880064 | -0.989147 | 0.934564  |
| 24 | 1  | 0 | -5.691466 | -2.092732 | 1.403269  |
| 25 | 1  | 0 | -5.845505 | 2.185262  | -1.129854 |
| 26 | 1  | 0 | -0.350665 | 1.584859  | -1.221629 |
| 27 | 1  | 0 | 1.013005  | -2.032179 | 0.724045  |
| 28 | 1  | 0 | -1.326575 | -2.623500 | 1.268610  |
| 29 | 1  | 0 | 2.437292  | -0.721166 | -0.432094 |
| 30 | 6  | 0 | 4.219578  | -0.349488 | -1.970670 |
| 31 | 1  | 0 | 5.187036  | 1.970384  | -2.917607 |
| 32 | 1  | 0 | 2.312933  | 4.604430  | -1.134211 |
| 33 | 1  | 0 | 1.155562  | 2.678518  | -0.146332 |
| 34 | 8  | 0 | 3.841054  | -1.338108 | -1.357239 |
| 35 | 8  | 0 | 5.215148  | -0.383967 | -2.848894 |
| 36 | 6  | 0 | 5.871023  | -1.661925 | -3.046914 |
| 37 | 1  | 0 | 4.329120  | 4.263863  | -2.548858 |
| 38 | 1  | 0 | 5.152987  | -2.396598 | -3.409712 |
| 39 | 1  | 0 | 6.309226  | -2.004196 | -2.109972 |
| 40 | 1  | 0 | 6.640636  | -1.471159 | -3.789461 |

11B: E = -1429.3872594 a.u.,  $\omega_1=22.6\text{ cm}^{-1}$

| Center | Atomic | Atomic | Coordinates (Angstroms) |   |   |
|--------|--------|--------|-------------------------|---|---|
| Number | Number | Type   | X                       | Y | Z |

---

|    |    |   |           |           |           |
|----|----|---|-----------|-----------|-----------|
| 1  | 6  | 0 | -7.583332 | -2.730344 | 0.221758  |
| 2  | 6  | 0 | -7.815382 | -1.424646 | -0.249897 |
| 3  | 6  | 0 | -6.755827 | -0.571223 | -0.453990 |
| 4  | 6  | 0 | -5.424723 | -0.990324 | -0.195263 |
| 5  | 6  | 0 | -5.213163 | -2.317453 | 0.280654  |
| 6  | 6  | 0 | -6.298287 | -3.176672 | 0.485879  |
| 7  | 16 | 0 | -3.614326 | -2.924218 | 0.620573  |
| 8  | 6  | 0 | -2.588699 | -1.571319 | 0.247595  |
| 9  | 6  | 0 | -3.165047 | -0.322650 | -0.227308 |
| 10 | 7  | 0 | -4.441948 | -0.082457 | -0.422716 |
| 11 | 6  | 0 | -1.227958 | -1.698873 | 0.416360  |
| 12 | 6  | 0 | -0.354718 | -0.617282 | 0.145842  |
| 13 | 6  | 0 | -0.905556 | 0.613111  | -0.358731 |
| 14 | 6  | 0 | -2.243599 | 0.742544  | -0.533996 |
| 15 | 7  | 0 | 0.966058  | -0.817616 | 0.333623  |
| 16 | 6  | 0 | 2.046713  | 0.085182  | 0.284735  |
| 17 | 6  | 0 | 3.311780  | -0.387354 | -0.150377 |
| 18 | 6  | 0 | 4.388512  | 0.505252  | -0.189744 |
| 19 | 6  | 0 | 4.241249  | 1.828886  | 0.207218  |
| 20 | 6  | 0 | 3.007389  | 2.271869  | 0.678954  |
| 21 | 6  | 0 | 1.919941  | 1.407167  | 0.725481  |
| 22 | 1  | 0 | -8.419151 | -3.401060 | 0.381964  |
| 23 | 1  | 0 | -8.827510 | -1.096153 | -0.450123 |
| 24 | 1  | 0 | -6.894761 | 0.440273  | -0.814632 |
| 25 | 1  | 0 | -6.134439 | -4.185082 | 0.848119  |
| 26 | 1  | 0 | -0.806562 | -2.629791 | 0.780035  |
| 27 | 1  | 0 | -0.243223 | 1.418301  | -0.640909 |
| 28 | 1  | 0 | -2.674971 | 1.651500  | -0.934654 |
| 29 | 1  | 0 | 1.287455  | -1.792155 | 0.364937  |
| 30 | 6  | 0 | 3.514071  | -1.820830 | -0.507462 |
| 31 | 1  | 0 | 5.348573  | 0.141922  | -0.529629 |
| 32 | 1  | 0 | 2.891915  | 3.289735  | 1.032074  |
| 33 | 1  | 0 | 0.984662  | 1.747603  | 1.148946  |
| 34 | 8  | 0 | 2.694820  | -2.702980 | -0.287819 |
| 35 | 8  | 0 | 4.692540  | -2.056701 | -1.073067 |
| 36 | 6  | 0 | 4.993785  | -3.433111 | -1.413379 |
| 37 | 1  | 0 | 5.088079  | 2.502677  | 0.171442  |
| 38 | 1  | 0 | 4.259480  | -3.810303 | -2.124385 |
| 39 | 1  | 0 | 4.988561  | -4.048606 | -0.514326 |
| 40 | 1  | 0 | 5.984600  | -3.402815 | -1.857781 |

12A: E = -1508.0227938 a.u.,  $\omega_1=15.8\text{ cm}^{-1}$

| Number | Number | Type | X         | Y         | Z         |
|--------|--------|------|-----------|-----------|-----------|
| 1      | 6      | 0    | -6.484988 | 0.504154  | -0.117987 |
| 2      | 6      | 0    | -6.319132 | -0.040377 | 1.169348  |
| 3      | 6      | 0    | -5.068799 | -0.425285 | 1.594859  |
| 4      | 6      | 0    | -3.937430 | -0.279883 | 0.750454  |
| 5      | 6      | 0    | -4.128288 | 0.274817  | -0.548402 |
| 6      | 6      | 0    | -5.404971 | 0.662148  | -0.971368 |
| 7      | 16     | 0    | -2.798419 | 0.494793  | -1.653657 |
| 8      | 6      | 0    | -1.432017 | -0.099524 | -0.758629 |
| 9      | 6      | 0    | -1.611100 | -0.614777 | 0.589974  |
| 10     | 7      | 0    | -2.743199 | -0.687168 | 1.250904  |
| 11     | 6      | 0    | -0.189919 | -0.071099 | -1.351944 |
| 12     | 6      | 0    | 0.957497  | -0.546105 | -0.666474 |
| 13     | 6      | 0    | 0.793028  | -1.055622 | 0.675119  |
| 14     | 6      | 0    | -0.426877 | -1.087257 | 1.260981  |
| 15     | 7      | 0    | 2.167356  | -0.537163 | -1.263675 |
| 16     | 6      | 0    | 2.359699  | 0.081575  | -2.562229 |
| 17     | 6      | 0    | 2.376535  | -0.718060 | -3.704297 |
| 18     | 6      | 0    | 2.599829  | -0.126519 | -4.946398 |
| 19     | 6      | 0    | 2.805819  | 1.249448  | -5.038933 |
| 20     | 6      | 0    | 2.789518  | 2.038719  | -3.889756 |
| 21     | 6      | 0    | 2.566674  | 1.458575  | -2.641799 |
| 22     | 1      | 0    | -7.470726 | 0.806438  | -0.451265 |
| 23     | 1      | 0    | -7.176724 | -0.154556 | 1.820447  |
| 24     | 1      | 0    | -4.901925 | -0.848640 | 2.577416  |
| 25     | 1      | 0    | -5.547169 | 1.083595  | -1.959841 |
| 26     | 1      | 0    | -0.078308 | 0.315953  | -2.355486 |
| 27     | 1      | 0    | 1.650622  | -1.402914 | 1.231644  |
| 28     | 1      | 0    | -0.559382 | -1.462067 | 2.268234  |
| 29     | 1      | 0    | 2.613870  | -0.741109 | -5.838575 |
| 30     | 1      | 0    | 2.955279  | 3.107153  | -3.960901 |
| 31     | 1      | 0    | 2.562607  | 2.054921  | -1.737310 |
| 32     | 1      | 0    | 2.982711  | 1.705381  | -6.005840 |
| 33     | 1      | 0    | 2.215553  | -1.786981 | -3.621330 |
| 34     | 6      | 0    | 3.383080  | -0.997641 | -0.594580 |
| 35     | 1      | 0    | 3.216696  | -1.941411 | -0.072002 |
| 36     | 1      | 0    | 4.135277  | -1.193736 | -1.358030 |
| 37     | 6      | 0    | 3.944737  | 0.039808  | 0.389926  |
| 38     | 8      | 0    | 3.402017  | 1.082211  | 0.656887  |
| 39     | 8      | 0    | 5.095279  | -0.398592 | 0.888729  |
| 40     | 6      | 0    | 5.786735  | 0.470787  | 1.847804  |
| 41     | 1      | 0    | 5.115794  | 0.635868  | 2.692512  |
| 42     | 1      | 0    | 5.966283  | 1.429226  | 1.358361  |
| 43     | 6      | 0    | 7.067742  | -0.223017 | 2.251458  |
| 44     | 1      | 0    | 7.604747  | 0.403310  | 2.968036  |

---

|    |   |   |          |           |          |
|----|---|---|----------|-----------|----------|
| 45 | 1 | 0 | 6.864553 | -1.185296 | 2.725572 |
| 46 | 1 | 0 | 7.716615 | -0.386766 | 1.388934 |

**12B:** E = -1508.0226831 a.u.,  $\omega_1=16.2\text{ cm}^{-1}$

| Center<br>Number | Atomic<br>Number | Atomic<br>Type | Coordinates (Angstroms) |           |           |
|------------------|------------------|----------------|-------------------------|-----------|-----------|
|                  |                  |                | X                       | Y         | Z         |
| -----            |                  |                |                         |           |           |
| 1                | 6                | 0              | -6.235759               | 1.285540  | -0.673412 |
| 2                | 6                | 0              | -6.434473               | -0.084350 | -0.418645 |
| 3                | 6                | 0              | -5.356826               | -0.894192 | -0.143211 |
| 4                | 6                | 0              | -4.040488               | -0.365196 | -0.110351 |
| 5                | 6                | 0              | -3.863346               | 1.024659  | -0.368676 |
| 6                | 6                | 0              | -4.965899               | 1.839269  | -0.650317 |
| 7                | 16               | 0              | -2.284342               | 1.762933  | -0.345202 |
| 8                | 6                | 0              | -1.226877               | 0.439742  | 0.039146  |
| 9                | 6                | 0              | -1.769676               | -0.896297 | 0.231333  |
| 10               | 7                | 0              | -3.035951               | -1.236366 | 0.163094  |
| 11               | 6                | 0              | 0.126541                | 0.682042  | 0.139644  |
| 12               | 6                | 0              | 1.034504                | -0.367930 | 0.428086  |
| 13               | 6                | 0              | 0.506913                | -1.700060 | 0.617221  |
| 14               | 6                | 0              | -0.821356               | -1.940623 | 0.526755  |
| 15               | 7                | 0              | 2.360342                | -0.150764 | 0.552677  |
| 16               | 6                | 0              | 3.302642                | -1.248949 | 0.668702  |
| 17               | 6                | 0              | 3.847018                | -1.554635 | 1.915539  |
| 18               | 6                | 0              | 4.778008                | -2.586444 | 2.017512  |
| 19               | 6                | 0              | 5.158739                | -3.300039 | 0.881521  |
| 20               | 6                | 0              | 4.611580                | -2.982351 | -0.360627 |
| 21               | 6                | 0              | 3.680485                | -1.951236 | -0.475342 |
| 22               | 1                | 0              | -7.085870               | 1.921112  | -0.891295 |
| 23               | 1                | 0              | -7.435366               | -0.496799 | -0.441773 |
| 24               | 1                | 0              | -5.469962               | -1.952632 | 0.055330  |
| 25               | 1                | 0              | -4.827224               | 2.896001  | -0.847810 |
| 26               | 1                | 0              | 0.491393                | 1.683237  | -0.038947 |
| 27               | 1                | 0              | 1.191292                | -2.504762 | 0.844317  |
| 28               | 1                | 0              | -1.226674               | -2.933483 | 0.677058  |
| 29               | 1                | 0              | 5.201820                | -2.832878 | 2.983672  |
| 30               | 1                | 0              | 4.911681                | -3.532511 | -1.244507 |
| 31               | 1                | 0              | 3.258626                | -1.680418 | -1.435634 |
| 32               | 1                | 0              | 5.883453                | -4.101204 | 0.964556  |
| 33               | 1                | 0              | 3.540592                | -0.998116 | 2.794127  |
| 34               | 6                | 0              | 2.950291                | 1.178715  | 0.419538  |
| 35               | 1                | 0              | 2.354151                | 1.927854  | 0.945086  |
| 36               | 1                | 0              | 3.929390                | 1.166435  | 0.897499  |
| 37               | 6                | 0              | 3.129072                | 1.603568  | -1.046514 |

|    |   |   |          |          |           |
|----|---|---|----------|----------|-----------|
| 38 | 8 | 0 | 2.731551 | 0.968032 | -1.989872 |
| 39 | 8 | 0 | 3.774268 | 2.764584 | -1.096043 |
| 40 | 6 | 0 | 4.053267 | 3.322349 | -2.424131 |
| 41 | 1 | 0 | 3.099790 | 3.457781 | -2.937516 |
| 42 | 1 | 0 | 4.639937 | 2.587021 | -2.976890 |
| 43 | 6 | 0 | 4.795188 | 4.624521 | -2.225440 |
| 44 | 1 | 0 | 5.016678 | 5.064191 | -3.201020 |
| 45 | 1 | 0 | 4.195728 | 5.339003 | -1.657750 |
| 46 | 1 | 0 | 5.739524 | 4.464805 | -1.701570 |

**13A:** E = -1405.9881632 a.u.,  $\omega_1=20.0\text{ cm}^{-1}$

| Center | Atomic | Atomic | Coordinates (Angstroms) |           |           |
|--------|--------|--------|-------------------------|-----------|-----------|
| Number | Number | Type   | X                       | Y         | Z         |
| -----  |        |        |                         |           |           |
| 1      | 6      | 0      | -7.167848               | 0.171851  | 0.174868  |
| 2      | 6      | 0      | -6.871248               | 1.487810  | -0.231679 |
| 3      | 6      | 0      | -5.564219               | 1.869963  | -0.419282 |
| 4      | 6      | 0      | -4.502008               | 0.949847  | -0.209949 |
| 5      | 6      | 0      | -4.827118               | -0.379012 | 0.199648  |
| 6      | 6      | 0      | -6.161304               | -0.755303 | 0.390566  |
| 7      | 16     | 0      | -3.591816               | -1.573724 | 0.475446  |
| 8      | 6      | 0      | -2.122156               | -0.719917 | 0.134252  |
| 9      | 6      | 0      | -2.161773               | 0.677503  | -0.260380 |
| 10     | 7      | 0      | -3.245305               | 1.409421  | -0.410504 |
| 11     | 6      | 0      | -0.921281               | -1.396297 | 0.257514  |
| 12     | 6      | 0      | 0.294230                | -0.732190 | 0.003146  |
| 13     | 6      | 0      | 0.275348                | 0.658111  | -0.369800 |
| 14     | 6      | 0      | -0.896221               | 1.324304  | -0.498487 |
| 15     | 7      | 0      | 1.500771                | -1.334952 | 0.113069  |
| 16     | 6      | 0      | 1.787727                | -2.707047 | 0.364886  |
| 17     | 6      | 0      | 2.746509                | -3.019822 | 1.333515  |
| 18     | 6      | 0      | 3.080069                | -4.346736 | 1.574159  |
| 19     | 6      | 0      | 2.440976                | -5.339978 | 0.841971  |
| 20     | 6      | 0      | 1.496991                | -5.047563 | -0.135228 |
| 21     | 6      | 0      | 1.174617                | -3.719007 | -0.381761 |
| 22     | 1      | 0      | -8.199509               | -0.124788 | 0.322648  |
| 23     | 1      | 0      | -7.675466               | 2.194501  | -0.393538 |
| 24     | 1      | 0      | -5.297000               | 2.872460  | -0.729179 |
| 25     | 1      | 0      | -6.405508               | -1.763947 | 0.703344  |
| 26     | 1      | 0      | -0.912491               | -2.430525 | 0.574465  |
| 27     | 1      | 0      | 1.216331                | 1.163427  | -0.557812 |
| 28     | 1      | 0      | -0.929253               | 2.367543  | -0.786492 |
| 29     | 1      | 0      | 2.307937                | -0.727030 | 0.054604  |
| 30     | 1      | 0      | 1.044844                | -5.851832 | -0.699512 |

|    |   |   |          |           |           |
|----|---|---|----------|-----------|-----------|
| 31 | 1 | 0 | 0.477263 | -3.471625 | -1.172170 |
| 32 | 7 | 0 | 2.783943 | -6.761700 | 1.104790  |
| 33 | 1 | 0 | 3.220408 | -2.230632 | 1.905694  |
| 34 | 8 | 0 | 2.165573 | -7.608488 | 0.478091  |
| 35 | 8 | 0 | 3.655926 | -6.981371 | 1.930346  |
| 36 | 1 | 0 | 3.814908 | -4.618114 | 2.319855  |

**13B:** E = -1405.987215 a.u.,  $\omega_1=19.8\text{ cm}^{-1}$

| Center | Atomic | Atomic | Coordinates (Angstroms) |           |           |
|--------|--------|--------|-------------------------|-----------|-----------|
| Number | Number | Type   | X                       | Y         | Z         |
| -----  |        |        |                         |           |           |
| 1      | 6      | 0      | -7.724859               | -2.683241 | 0.200706  |
| 2      | 6      | 0      | -7.953766               | -1.338042 | -0.149349 |
| 3      | 6      | 0      | -6.890739               | -0.482728 | -0.317225 |
| 4      | 6      | 0      | -5.556780               | -0.939712 | -0.142251 |
| 5      | 6      | 0      | -5.349401               | -2.307743 | 0.211395  |
| 6      | 6      | 0      | -6.439481               | -3.168310 | 0.380443  |
| 7      | 16     | 0      | -3.750740               | -2.957311 | 0.442978  |
| 8      | 6      | 0      | -2.718619               | -1.594809 | 0.146963  |
| 9      | 6      | 0      | -3.288588               | -0.303504 | -0.198059 |
| 10     | 7      | 0      | -4.570174               | -0.031849 | -0.324902 |
| 11     | 6      | 0      | -1.351340               | -1.755914 | 0.252099  |
| 12     | 6      | 0      | -0.477621               | -0.669177 | 0.031978  |
| 13     | 6      | 0      | -1.022536               | 0.610746  | -0.330447 |
| 14     | 6      | 0      | -2.364459               | 0.774489  | -0.438676 |
| 15     | 7      | 0      | 0.856782                | -0.871219 | 0.134968  |
| 16     | 6      | 0      | 1.907869                | 0.089382  | 0.104912  |
| 17     | 6      | 0      | 3.040163                | -0.190604 | -0.666946 |
| 18     | 6      | 0      | 4.103826                | 0.702197  | -0.684360 |
| 19     | 6      | 0      | 4.011899                | 1.866775  | 0.068570  |
| 20     | 6      | 0      | 2.900772                | 2.155774  | 0.851498  |
| 21     | 6      | 0      | 1.844339                | 1.253822  | 0.877760  |
| 22     | 1      | 0      | -8.565463               | -3.354255 | 0.332263  |
| 23     | 1      | 0      | -8.967538               | -0.982587 | -0.284553 |
| 24     | 1      | 0      | -7.026360               | 0.557593  | -0.585159 |
| 25     | 1      | 0      | -6.280164               | -4.206190 | 0.649205  |
| 26     | 1      | 0      | -0.936862               | -2.722177 | 0.520003  |
| 27     | 1      | 0      | -0.353873               | 1.432406  | -0.544905 |
| 28     | 1      | 0      | -2.795387               | 1.725057  | -0.727610 |
| 29     | 1      | 0      | 1.157074                | -1.833339 | 0.230129  |
| 30     | 1      | 0      | 2.882736                | 3.062272  | 1.441160  |
| 31     | 1      | 0      | 0.993134                | 1.440901  | 1.520169  |
| 32     | 7      | 0      | 5.143451                | 2.829633  | 0.044916  |
| 33     | 1      | 0      | 3.083958                | -1.095552 | -1.261937 |

|    |   |   |          |          |           |
|----|---|---|----------|----------|-----------|
| 34 | 8 | 0 | 5.013332 | 3.857944 | 0.690906  |
| 35 | 8 | 0 | 6.120680 | 2.524588 | -0.620310 |
| 36 | 1 | 0 | 4.989733 | 0.513683 | -1.275334 |

**14A:** E = -1409.5088322 a.u.,  $\omega_1=17.1\text{ cm}^{-1}$

| Center | Atomic | Atomic | Coordinates (Angstroms) |           |           |
|--------|--------|--------|-------------------------|-----------|-----------|
| Number | Number | Type   | X                       | Y         | Z         |
| -----  |        |        |                         |           |           |
| 1      | 6      | 0      | -7.649332               | 0.123599  | 0.141191  |
| 2      | 6      | 0      | -7.367306               | 1.442493  | -0.260976 |
| 3      | 6      | 0      | -6.062576               | 1.842008  | -0.437459 |
| 4      | 6      | 0      | -4.990606               | 0.937459  | -0.221640 |
| 5      | 6      | 0      | -5.300068               | -0.393759 | 0.182734  |
| 6      | 6      | 0      | -6.629964               | -0.788742 | 0.363146  |
| 7      | 16     | 0      | -4.049156               | -1.575304 | 0.467172  |
| 8      | 6      | 0      | -2.586474               | -0.698731 | 0.137585  |
| 9      | 6      | 0      | -2.645505               | 0.700705  | -0.255352 |
| 10     | 7      | 0      | -3.735645               | 1.417227  | -0.411862 |
| 11     | 6      | 0      | -1.378816               | -1.355554 | 0.268627  |
| 12     | 6      | 0      | -0.167767               | -0.672647 | 0.025874  |
| 13     | 6      | 0      | -0.205818               | 0.719649  | -0.341643 |
| 14     | 6      | 0      | -1.385767               | 1.367290  | -0.478895 |
| 15     | 7      | 0      | 1.041432                | -1.259802 | 0.137800  |
| 16     | 6      | 0      | 1.349364                | -2.631223 | 0.362888  |
| 17     | 6      | 0      | 2.320106                | -2.960058 | 1.311761  |
| 18     | 6      | 0      | 2.677094                | -4.282743 | 1.532359  |
| 19     | 6      | 0      | 2.083427                | -5.315603 | 0.787383  |
| 20     | 6      | 0      | 1.110787                | -4.969429 | -0.170687 |
| 21     | 6      | 0      | 0.749505                | -3.650427 | -0.385184 |
| 22     | 1      | 0      | -8.677615               | -0.188164 | 0.280854  |
| 23     | 1      | 0      | -8.178842               | 2.139453  | -0.428580 |
| 24     | 1      | 0      | -5.806944               | 2.848674  | -0.743693 |
| 25     | 1      | 0      | -6.861481               | -1.801335 | 0.672972  |
| 26     | 1      | 0      | -1.353843               | -2.390163 | 0.583640  |
| 27     | 1      | 0      | 0.729108                | 1.240248  | -0.518630 |
| 28     | 1      | 0      | -1.432865               | 2.411258  | -0.762200 |
| 29     | 1      | 0      | 1.839609                | -0.640420 | 0.072683  |
| 30     | 1      | 0      | 0.659738                | -5.748598 | -0.774813 |
| 31     | 1      | 0      | 0.035070                | -3.412484 | -1.163842 |
| 32     | 7      | 0      | 2.365437                | -6.669246 | 0.965843  |
| 33     | 1      | 0      | 2.779469                | -2.179791 | 1.908638  |
| 34     | 1      | 0      | 3.393441                | -4.504291 | 2.308604  |
| 35     | 6      | 0      | 3.489876                | -7.377127 | 1.418828  |
| 36     | 8      | 0      | 3.408679                | -8.584642 | 1.478582  |
| 37     | 6      | 0      | 4.752141                | -6.629932 | 1.777006  |

|    |   |   |          |           |          |
|----|---|---|----------|-----------|----------|
| 38 | 1 | 0 | 1.657310 | -7.314448 | 0.635842 |
| 39 | 1 | 0 | 4.694776 | -6.260331 | 2.804928 |
| 40 | 1 | 0 | 4.948731 | -5.787514 | 1.112181 |
| 41 | 1 | 0 | 5.574209 | -7.341409 | 1.724442 |

**14B:** E = -1409.5080404 a.u.,  $\omega_1=16.8\text{ cm}^{-1}$

| Center<br>Number | Atomic<br>Number | Atomic<br>Type | Coordinates (Angstroms) |           |           |
|------------------|------------------|----------------|-------------------------|-----------|-----------|
|                  |                  |                | X                       | Y         | Z         |
| -----            |                  |                |                         |           |           |
| 1                | 6                | 0              | -7.799330               | -2.619278 | 0.209148  |
| 2                | 6                | 0              | -8.002401               | -1.276577 | -0.159932 |
| 3                | 6                | 0              | -6.922081               | -0.442770 | -0.336012 |
| 4                | 6                | 0              | -5.598405               | -0.919737 | -0.150432 |
| 5                | 6                | 0              | -5.416848               | -2.283461 | 0.222344  |
| 6                | 6                | 0              | -6.521938               | -3.122480 | 0.399618  |
| 7                | 16               | 0              | -3.828229               | -2.960472 | 0.470087  |
| 8                | 6                | 0              | -2.770131               | -1.618290 | 0.155498  |
| 9                | 6                | 0              | -3.319265               | -0.321304 | -0.209759 |
| 10               | 7                | 0              | -4.593197               | -0.028648 | -0.343728 |
| 11               | 6                | 0              | -1.408448               | -1.800202 | 0.264488  |
| 12               | 6                | 0              | -0.512444               | -0.730658 | 0.030222  |
| 13               | 6                | 0              | -1.035998               | 0.552783  | -0.354321 |
| 14               | 6                | 0              | -2.373955               | 0.736627  | -0.467378 |
| 15               | 7                | 0              | 0.814081                | -0.948490 | 0.145304  |
| 16               | 6                | 0              | 1.875848                | -0.000041 | 0.127864  |
| 17               | 6                | 0              | 3.017638                | -0.275250 | -0.628042 |
| 18               | 6                | 0              | 4.089093                | 0.606269  | -0.640534 |
| 19               | 6                | 0              | 4.052936                | 1.784623  | 0.124486  |
| 20               | 6                | 0              | 2.897281                | 2.047199  | 0.885838  |
| 21               | 6                | 0              | 1.826902                | 1.169616  | 0.894404  |
| 22               | 1                | 0              | -8.651452               | -3.274163 | 0.347376  |
| 23               | 1                | 0              | -9.008761               | -0.903828 | -0.303855 |
| 24               | 1                | 0              | -7.038770               | 0.595867  | -0.619063 |
| 25               | 1                | 0              | -6.380440               | -4.158998 | 0.683393  |
| 26               | 1                | 0              | -1.010030               | -2.768950 | 0.547929  |
| 27               | 1                | 0              | -0.350726               | 1.357285  | -0.581600 |
| 28               | 1                | 0              | -2.788990               | 1.688371  | -0.775085 |
| 29               | 1                | 0              | 1.096979                | -1.912859 | 0.269702  |
| 30               | 1                | 0              | 2.858069                | 2.938105  | 1.502392  |
| 31               | 1                | 0              | 0.972628                | 1.375365  | 1.528025  |
| 32               | 7                | 0              | 5.073719                | 2.733415  | 0.148200  |
| 33               | 1                | 0              | 3.059198                | -1.169670 | -1.239870 |
| 34               | 1                | 0              | 4.934164                | 0.386149  | -1.274361 |
| 35               | 6                | 0              | 6.459877                | 2.679309  | -0.068121 |



|    |   |   |          |          |           |
|----|---|---|----------|----------|-----------|
| 36 | 8 | 0 | 7.082962 | 3.715329 | 0.012864  |
| 37 | 6 | 0 | 7.123642 | 1.354171 | -0.357178 |
| 38 | 1 | 0 | 4.805977 | 3.660399 | 0.457738  |
| 39 | 1 | 0 | 7.034919 | 1.110014 | -1.419715 |
| 40 | 1 | 0 | 6.703220 | 0.534051 | 0.226821  |
| 41 | 1 | 0 | 8.181707 | 1.466179 | -0.127756 |

**15A:** E = -1825.3175971 a.u.,  $\omega_1=1.1\text{ cm}^{-1}$

| Center | Atomic | Atomic | Coordinates (Angstroms) |           |           |
|--------|--------|--------|-------------------------|-----------|-----------|
| Number | Number | Type   | X                       | Y         | Z         |
| -----  |        |        |                         |           |           |
| 1      | 6      | 0      | 7.651961                | -0.422330 | 0.198996  |
| 2      | 6      | 0      | 7.476098                | 0.817809  | 0.843475  |
| 3      | 6      | 0      | 6.213468                | 1.341474  | 0.990877  |
| 4      | 6      | 0      | 5.077090                | 0.644147  | 0.500895  |
| 5      | 6      | 0      | 5.279534                | -0.611215 | -0.147362 |
| 6      | 6      | 0      | 6.569663                | -1.133211 | -0.293573 |
| 7      | 16     | 0      | 3.945511                | -1.536453 | -0.776140 |
| 8      | 6      | 0      | 2.563679                | -0.560724 | -0.396594 |
| 9      | 6      | 0      | 2.730974                | 0.710921  | 0.287977  |
| 10     | 7      | 0      | 3.871489                | 1.232632  | 0.683821  |
| 11     | 6      | 0      | 1.311429                | -1.014232 | -0.767695 |
| 12     | 6      | 0      | 0.167296                | -0.239503 | -0.489758 |
| 13     | 6      | 0      | 0.313626                | 1.027653  | 0.179085  |
| 14     | 6      | 0      | 1.536032                | 1.474404  | 0.549971  |
| 15     | 7      | 0      | -1.074509               | -0.633892 | -0.839275 |
| 16     | 6      | 0      | -1.436695               | -1.873394 | -1.462769 |
| 17     | 6      | 0      | -1.958353               | -1.851228 | -2.754286 |
| 18     | 6      | 0      | -2.335151               | -3.057073 | -3.336574 |
| 19     | 6      | 0      | -2.193157               | -4.271273 | -2.672028 |
| 20     | 6      | 0      | -1.671909               | -4.273175 | -1.379314 |
| 21     | 6      | 0      | -1.300770               | -3.078179 | -0.768438 |
| 22     | 1      | 0      | 8.648838                | -0.831203 | 0.084010  |
| 23     | 1      | 0      | 8.337518                | 1.355229  | 1.219651  |
| 24     | 1      | 0      | 6.038706                | 2.292273  | 1.478598  |
| 25     | 1      | 0      | 6.720987                | -2.085962 | -0.787717 |
| 26     | 1      | 0      | 1.204023                | -1.955577 | -1.290903 |
| 27     | 1      | 0      | -0.573088               | 1.616848  | 0.385508  |
| 28     | 1      | 0      | 1.666529                | 2.422317  | 1.056769  |
| 29     | 1      | 0      | -1.823987               | 0.030108  | -0.690692 |
| 30     | 16     | 0      | -2.993134               | -3.025807 | -5.012490 |
| 31     | 1      | 0      | -1.564073               | -5.208002 | -0.843036 |
| 32     | 1      | 0      | -0.919672               | -3.076486 | 0.246055  |
| 33     | 1      | 0      | -2.473943               | -5.195448 | -3.161625 |

|    |   |   |           |           |           |
|----|---|---|-----------|-----------|-----------|
| 34 | 1 | 0 | -2.050868 | -0.924630 | -3.307678 |
| 35 | 8 | 0 | -2.544551 | -1.796540 | -5.629486 |
| 36 | 8 | 0 | -2.796490 | -4.332148 | -5.618345 |
| 37 | 8 | 0 | -4.595910 | -2.854164 | -4.711397 |
| 38 | 1 | 0 | -5.065477 | -3.638716 | -5.036563 |

**15B:** E = -1825.3168073 a.u.,  $\omega_1=9.8\text{ cm}^{-1}$

| Center<br>Number | Atomic<br>Number | Atomic<br>Type | Coordinates (Angstroms) |           |           |
|------------------|------------------|----------------|-------------------------|-----------|-----------|
|                  |                  |                | X                       | Y         | Z         |
| -----            |                  |                |                         |           |           |
| 1                | 6                | 0              | -7.667316               | -2.629379 | 0.047766  |
| 2                | 6                | 0              | -7.829271               | -1.353240 | -0.525874 |
| 3                | 6                | 0              | -6.736830               | -0.537471 | -0.702793 |
| 4                | 6                | 0              | -5.439875               | -0.966455 | -0.313213 |
| 5                | 6                | 0              | -5.300044               | -2.263679 | 0.265675  |
| 6                | 6                | 0              | -6.419254               | -3.084723 | 0.441381  |
| 7                | 16               | 0              | -3.749584               | -2.874441 | 0.771683  |
| 8                | 6                | 0              | -2.662736               | -1.578900 | 0.382564  |
| 9                | 6                | 0              | -3.166360               | -0.353981 | -0.217851 |
| 10               | 7                | 0              | -4.420373               | -0.100476 | -0.523010 |
| 11               | 6                | 0              | -1.318605               | -1.728942 | 0.655745  |
| 12               | 6                | 0              | -0.402716               | -0.695437 | 0.357930  |
| 13               | 6                | 0              | -0.880458               | 0.518570  | -0.247409 |
| 14               | 6                | 0              | -2.199791               | 0.671286  | -0.518710 |
| 15               | 7                | 0              | 0.908236                | -0.877594 | 0.624406  |
| 16               | 6                | 0              | 1.966859                | 0.075541  | 0.481152  |
| 17               | 6                | 0              | 3.046141                | -0.243842 | -0.340925 |
| 18               | 6                | 0              | 4.088995                | 0.669256  | -0.449552 |
| 19               | 6                | 0              | 4.074895                | 1.887201  | 0.223415  |
| 20               | 6                | 0              | 2.989982                | 2.187266  | 1.044968  |
| 21               | 6                | 0              | 1.941456                | 1.282162  | 1.185865  |
| 22               | 1                | 0              | -8.530460               | -3.269890 | 0.185280  |
| 23               | 1                | 0              | -8.814689               | -1.019379 | -0.825578 |
| 24               | 1                | 0              | -6.821141               | 0.449551  | -1.139965 |
| 25               | 1                | 0              | -6.310941               | -4.069490 | 0.881065  |
| 26               | 1                | 0              | -0.953251               | -2.644874 | 1.108158  |
| 27               | 1                | 0              | -0.174304               | 1.295299  | -0.506188 |
| 28               | 1                | 0              | -2.579761               | 1.569866  | -0.988727 |
| 29               | 1                | 0              | 1.186783                | -1.801857 | 0.929730  |
| 30               | 16               | 0              | 5.472404                | 0.259825  | -1.527264 |
| 31               | 1                | 0              | 2.966627                | 3.125139  | 1.586159  |
| 32               | 1                | 0              | 1.114753                | 1.503791  | 1.850387  |
| 33               | 1                | 0              | 4.890242                | 2.588451  | 0.097199  |
| 34               | 1                | 0              | 3.069315                | -1.167068 | -0.907175 |

|    |   |   |          |           |           |
|----|---|---|----------|-----------|-----------|
| 35 | 8 | 0 | 5.009934 | -0.741420 | -2.463577 |
| 36 | 8 | 0 | 6.124410 | 1.490433  | -1.942205 |
| 37 | 8 | 0 | 6.471402 | -0.498086 | -0.469496 |
| 38 | 1 | 0 | 7.292328 | 0.012987  | -0.388018 |

**16A:** E = -1201.4362853 a.u.,  $\omega_1=26.7\text{ cm}^{-1}$

| Center<br>Number | Atomic<br>Number | Atomic<br>Type | Coordinates (Angstroms) |           |           |
|------------------|------------------|----------------|-------------------------|-----------|-----------|
|                  |                  |                | X                       | Y         | Z         |
| -----            |                  |                |                         |           |           |
| 1                | 6                | 0              | 5.404214                | -1.621204 | -0.141055 |
| 2                | 6                | 0              | 5.822960                | -0.283365 | -0.011655 |
| 3                | 6                | 0              | 4.888824                | 0.722950  | 0.071236  |
| 4                | 6                | 0              | 3.500559                | 0.429841  | 0.029641  |
| 5                | 6                | 0              | 3.099617                | -0.932138 | -0.100408 |
| 6                | 6                | 0              | 4.058346                | -1.947755 | -0.186172 |
| 7                | 16               | 0              | 1.418168                | -1.386496 | -0.159946 |
| 8                | 6                | 0              | 0.586486                | 0.131529  | -0.029097 |
| 9                | 6                | 0              | 1.340280                | 1.370876  | 0.085042  |
| 10               | 7                | 0              | 2.649059                | 1.482396  | 0.110437  |
| 11               | 6                | 0              | -0.794153               | 0.131791  | -0.046033 |
| 12               | 6                | 0              | -1.505311               | 1.347832  | 0.042657  |
| 13               | 6                | 0              | -0.775328               | 2.586855  | 0.141159  |
| 14               | 6                | 0              | 0.577140                | 2.592697  | 0.164805  |
| 15               | 7                | 0              | -2.850682               | 1.408916  | 0.024428  |
| 16               | 6                | 0              | -3.783923               | 0.324444  | 0.025040  |
| 17               | 6                | 0              | -4.787676               | 0.303447  | -0.945711 |
| 18               | 6                | 0              | -5.732365               | -0.718812 | -0.932564 |
| 19               | 6                | 0              | -5.674168               | -1.715393 | 0.040817  |
| 20               | 6                | 0              | -4.674734               | -1.682921 | 1.012628  |
| 21               | 6                | 0              | -3.730320               | -0.660124 | 1.015091  |
| 22               | 1                | 0              | 6.142374                | -2.411702 | -0.207061 |
| 23               | 1                | 0              | 6.880027                | -0.051057 | 0.021028  |
| 24               | 1                | 0              | 5.172606                | 1.763277  | 0.169519  |
| 25               | 1                | 0              | 3.750394                | -2.982146 | -0.286790 |
| 26               | 1                | 0              | -1.339233               | -0.796984 | -0.149947 |
| 27               | 1                | 0              | -1.329835               | 3.516752  | 0.205498  |
| 28               | 1                | 0              | 1.141807                | 3.513080  | 0.245166  |
| 29               | 1                | 0              | -3.255454               | 2.335301  | -0.028110 |
| 30               | 1                | 0              | -6.510551               | -0.737387 | -1.685921 |
| 31               | 1                | 0              | -4.640894               | -2.443389 | 1.783572  |
| 32               | 1                | 0              | -2.980270               | -0.609046 | 1.795371  |
| 33               | 1                | 0              | -6.411274               | -2.509177 | 0.048102  |
| 34               | 1                | 0              | -4.821726               | 1.073928  | -1.707874 |

**16B:** E = -1201.4354139 a.u.,  $\omega_1=25.8\text{ cm}^{-1}$

| Center | Atomic | Atomic | Coordinates (Angstroms) |           |           |
|--------|--------|--------|-------------------------|-----------|-----------|
| Number | Number | Type   | X                       | Y         | Z         |
| -----  |        |        |                         |           |           |
| 1      | 6      | 0      | -7.617478               | -2.676487 | 0.165200  |
| 2      | 6      | 0      | -7.835807               | -1.335255 | -0.202009 |
| 3      | 6      | 0      | -6.765850               | -0.486256 | -0.365611 |
| 4      | 6      | 0      | -5.437340               | -0.945965 | -0.168758 |
| 5      | 6      | 0      | -5.240218               | -2.308458 | 0.202173  |
| 6      | 6      | 0      | -6.335588               | -3.163105 | 0.366527  |
| 7      | 16     | 0      | -3.645684               | -2.962998 | 0.464022  |
| 8      | 6      | 0      | -2.603373               | -1.606302 | 0.165167  |
| 9      | 6      | 0      | -3.166509               | -0.315790 | -0.203283 |
| 10     | 7      | 0      | -4.442991               | -0.041323 | -0.349358 |
| 11     | 6      | 0      | -1.240515               | -1.770015 | 0.287905  |
| 12     | 6      | 0      | -0.357462               | -0.687294 | 0.063648  |
| 13     | 6      | 0      | -0.895346               | 0.591917  | -0.318861 |
| 14     | 6      | 0      | -2.234126               | 0.757377  | -0.444821 |
| 15     | 7      | 0      | 0.969455                | -0.883813 | 0.186040  |
| 16     | 6      | 0      | 2.015651                | 0.091637  | 0.131807  |
| 17     | 6      | 0      | 3.100225                | -0.137032 | -0.717669 |
| 18     | 6      | 0      | 4.147474                | 0.779000  | -0.752504 |
| 19     | 6      | 0      | 4.111173                | 1.917152  | 0.052347  |
| 20     | 6      | 0      | 3.029780                | 2.133949  | 0.905209  |
| 21     | 6      | 0      | 1.982021                | 1.218677  | 0.956915  |
| 22     | 1      | 0      | -8.461919               | -3.343290 | 0.293372  |
| 23     | 1      | 0      | -8.845924               | -0.976202 | -0.354119 |
| 24     | 1      | 0      | -6.893946               | 0.551586  | -0.646625 |
| 25     | 1      | 0      | -6.182876               | -4.198424 | 0.648792  |
| 26     | 1      | 0      | -0.830797               | -2.734181 | 0.570547  |
| 27     | 1      | 0      | -0.218307               | 1.408353  | -0.527726 |
| 28     | 1      | 0      | -2.659911               | 1.705973  | -0.747561 |
| 29     | 1      | 0      | 1.272301                | -1.839626 | 0.327815  |
| 30     | 1      | 0      | 4.988186                | 0.605488  | -1.413223 |
| 31     | 1      | 0      | 3.008999                | 3.006607  | 1.546865  |
| 32     | 1      | 0      | 1.162084                | 1.362623  | 1.650492  |
| 33     | 1      | 0      | 4.927723                | 2.628332  | 0.021814  |
| 34     | 1      | 0      | 3.116895                | -1.015854 | -1.352529 |
